# Supplementary material
Source: PubMed Central journal article supplement (PMC6097237)
Supplement: NIHMS979389-supplement-Supplementary_Materials.pdf [file NIHMS979389-supplement-Supplementary_Materials.pdf]

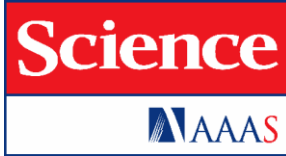

## Supplementary Materials for

### **Analysis of shared heritability in common disorders of the brain**

The Brainstorm Consortium\*†

\*All authors with their affiliations are listed in the main article.

†Corresponding authors: Verner Anttila (verneri.anttila@gmail.com); Aiden Corvin (acorvin@tcd.ie); Benjamin M. Neale (bneale@broadinstitute.org)

Published 22 June 2018, *Science* **360**, eaap8757 (2018)

DOI: 10.1126/science.aap8757

#### **This PDF file includes:**

Materials and Methods  
Supplementary Text  
Consortium Memberships  
Figs. S1 to S10  
Tables S1 to S6 and S8 to S11  
References

#### **Other Supplementary Material for this manuscript includes the following:**

(available at [www.sciencemag.org/content/360/6395/eaap8757/suppl/DC1](http://www.sciencemag.org/content/360/6395/eaap8757/suppl/DC1))

Tables S7, S12, and S13 (Excel files)

## Materials and Methods

### Data processing

We obtained GWAS meta-analysis summary statistics for 25 brain disorders and 17 phenotypes. Wherever non-European cohorts formed a part of those meta-analyses, we generated non-sex-stratified European-cohorts-only version of the meta-analysis of each disorder together with the primary analysts for each disorder to avoid bias stemming from ancestry differences. Prior to heritability analysis, each dataset underwent additional filtering: markers were excluded for not being present among the HapMap Project Phase 3 SNPs(83), having an allele mismatch to 1000 Genomes alleles, ambiguous strand information, INFO score <0.9 (where available), MAF<1%, and if considerable missingness in the meta-analysis was observed (where available; defined as effective per-SNP sample size less than two thirds of the 90th percentile of total sample size). To remove a potential source of bias, the major histocompatibility complex region (all SNPs on chromosome 6 between 25 and 35 Mb) was removed from all datasets, as was the region surrounding the APOE locus (all SNPs on chromosome 19 between 44 and 47 Mb) from the Alzheimer's disease summary data.

### Simulations

To evaluate the robustness of these results under various scenarios, we performed various simulations using data from the UK Biobank(84). Details about the UK Biobank project are available at <http://www.ukbiobank.ac.uk>. Data for the current analyses were obtained under an approved data request (application number #18597).

We used data from the interim release of 152,376 samples, originally genotyped on the UK BiLEVE Axiom array and the UK Biobank Axiom array. We filtered individuals for Caucasian ancestry and recommended removals to arrive at a final dataset of 120,267 individuals. Simulated datasets were generated to evaluate the behavior of correlation estimates 1) under different degrees of misclassification; 2) under different heritability estimates for the two traits and 3) under different liability thresholds (232 simulation conditions, 100 replicates per condition, for a total of 2.95 billion simulated individuals).

In each simulation replicate, two sets of simulated quantitative phenotypes with heritability ranging from 5-50% and prevalence ranging from 1-10% (relevant to the study phenotypes) were generated by assigning 5% of total SNPs to have simulated effect sizes drawn from  $N\left(0, \sqrt{\frac{h^2}{0.05 M}}\right)$ , where  $h^2$  is the heritability and  $M$  is the total number of markers in the genome, standardized for minor allele frequency ( $p$ ) by  $\sqrt{2 * p * (1 - p)}$ . Individual phenotypes were simulated by calculating the sum of mean centered betas multiplied by the individual's risk alleles with the `-score` option in PLINK v1.90b3.38(85) and adding noise term  $e$ , drawn from  $N(0, \sqrt{1 - h^2})$ , to achieve phenotypes which sum to  $N(0, h^2)$ . Dichotomous phenotypes were generated by assigning top 1%, 5% and 10% of each heritability simulation to be cases, and misclassification scenarios by mixing the simulated betas with those from a second, independently simulated phenotype in proportions ranging between 0-100%. Association statistics were created using an additive test in PLINK v1.90b3.38, and LDSC was used to calculate correlation estimates.

Simulation results were summarized to evaluate three specific scenarios considered relevant to the challenges (particularly for the psychiatric disorders, due to their spectrum-like behavior) in brain disorder co-morbidity:

1. *Effect of misclassification on phenotype heritability.* Given that we generally observe slightly lower heritability estimates in this study than reported in the literature with previous studies (which generally have used smaller, possibly less heterogeneous datasets), we generated 100 replicates each of simulated phenotypes at several prevalence and heritability values, and with varying degrees of misclassification of cases from a second, independent phenotype (Fig. S9A). These results demonstrate that while large-scale misclassification will impact the estimated heritability, very large misclassification proportions are required to by themselves give rise to large-scale changes in the observed heritability to the degree shown in Table S3.

2. *Effect of co-morbidity on genetic correlation.* Given the overlapping epidemiology of some phenotypes and the potential to observe false positive correlations due to non-trivial case misclassification, we created a range of phenotypes with varying mixing portions of correctly diagnosed cases ( $\lambda$ ) and incorrectly diagnosed cases ( $1-\lambda$ ) from an independent second phenotype and evaluated the genetic correlation between the hybrid phenotype and the second phenotype. This simulates the real-world scenario where e.g.  $(1-\lambda)$  proportion of bipolar cases would in fact be misclassified cases of schizophrenia free of bipolar disorder (Fig. S9B). We also derived a formula (see “Effect of co-morbidity and phenotypic misclassification on correlation estimates” below) to estimate the degree of misclassification required to produce the observed correlations in the absence of true genetic correlation (Table S6).

3. *Effect of bidirectional comorbidity on genetic correlation.* We expanded the simulation from the previous scenario given misclassification in both directions, i.e. where a proportion  $(1-\lambda)$  of bipolar disorder cases are misclassified schizophrenia cases and the same proportion of schizophrenia cases are misclassified bipolar disorder cases (Fig. S9C).

### Power calculations

Using the same methodology as described for the simulations, we created 100 replicated pairs of datasets, each with varying sample sizes (10,000, 20,000 and 40,000 individuals with a 50/50 case/control split, randomly selected from the UK Biobank data; see section above), heritabilities (1%, 5%, 10% and 20%) and polygenicity (simulating 0.5%-100% of markers contributing to the heritability). In the second set of similarly created replicates, phenotypes were additionally created to be 10%, 20%, 30%, or 40% correlated to their pair in the first set. LDSC was used to calculate the correlation between the pair (Figure S10).

### Heritability analysis

For a given trait, the total additive common SNP heritability in a set of GWAS summary statistics ( $h^2_g$ ) is estimated by regressing the association  $\chi^2$  statistic of a SNP against the total amount of common genetic variation tagged by that SNP (i.e., the sum of  $r^2$  between that SNP and all surrounding SNPs within a 1 Mb window, termed the LD score). The LD scores themselves, for each SNP with MAF 5-50% in the Hapmap3 data, were obtained from previously published data(24) (<https://github.com/bulik/ldsc>) but

edited by removing the at the time erroneously included HLA region markers [chr6, 20-36 Mb]. Genetic correlations,  $r_g$ , (i.e., the genome-wide average shared genetic risk) for a pair of phenotypes was similarly estimated by regressing the product of Z-score for each phenotype for each SNP, instead of the  $\chi^2$  statistic. The LD score referenced above is estimated from a common reference panel (for this work, the European subset of the 1000 Genomes Project reference). In this framework, including LD in the regression allows us to distinguish and account for LD-independent error sources (such as sample sharing and population stratification) from LD-dependent sources, like polygenic signal). It is essential to use an approach which is not biased by sample overlaps when analyzing summary statistics, given the large amount of control sharing between the GWAS meta-analyses in the study. P-values and effect directions for each phenotype were used to create a set of directional  $\chi^2$  statistics, which were then regressed against the SNP LD scores (as the  $\chi^2$  statistic is dependent on the amount of variation tagged by the SNP).

A univariate regression of these statistics against the LD statistic of each SNP was used to estimate the heritability for each phenotype using LDSC v1.0.0(24). When converting the results to liability scale, we assumed that all controls were unselected for all brain disorders as well as coronary artery disease and Crohn's disease from the additional phenotypes ( $u = 1$  for the formula presented in (86)). Phenotypes with a univariate heritability Z-score  $< 2$  were excluded from further analysis (cardioembolic, large-, and small-vessel stroke and agreeableness personality measure), leaving 21 brain disorder phenotypes and 16 traits of interest. In the genetic correlation analysis, the product of  $\chi^2$  statistics from the two phenotypes was similarly regressed.

Significance was assessed by Bonferroni multiple testing correction by estimating the number of independent brain disorder phenotypes by matrix decomposition of the genetic correlation results using matSpD (see Links)(87, 88). The number of independent disorder phenotypes was estimated to be 17.7943 (from 22 initial disorders, after exclusions), yielding a Bonferroni-corrected threshold of  $p < 3.35 \times 10^{-4}$  for disorder-disorder pairs; 12.1925 independent phenotypes (from 16 initial phenotypes, after exclusions) for a threshold of  $p < 7.33 \times 10^{-4}$  for phenotype-phenotype pairs and a total of 216.96 disorder-phenotype pairs for a threshold of  $p < 2.30 \times 10^{-4}$ .

### Functional enrichment and partitioning analysis

Partitioning analysis was conducted using LDSC v1.0.0(24), using stratified LD score regression to identify enriched cell type groups, expanding on the work described in Finucane et al(26). First, we obtained genome annotations for each of ten cell type groups, created by taking a union of regions with any of four histone modifications (H3K4me1, H3K4me3, H3K27ac, H3K9ac) in any cell type belonging to the cell type group. We then added each of these ten annotations to the full baseline model one at a time and performed LD score regression for each of the resulting ten models. For each of these ten analyses, we computed a Z-score for the regression coefficient corresponding to the cell type group, and we used this to test the hypothesis that the cell type group contributes positively to SNP heritability after controlling for the 53 categories in the full baseline model. Significance threshold was estimated from the number of independent phenotypes across 10 tissue categories and 53 functional categories (latter evaluated as 24 independent categories due to overlapping category structure) for Bonferroni thresholds

of  $p < 2.81 \times 10^{-4}$  and  $1.17 \times 10^{-4}$ , respectively. For the behavioral-cognitive traits and additional traits, the corresponding thresholds were  $p < 4.10 \times 10^{-4}$  and  $p < 1.71 \times 10^{-4}$ .

### Correlation between heritability and dataset-specific factors

A weighted-least squares analysis was conducted among the brain disorder phenotypes in R, version 3.2, to determine what, if any, phenotype and dataset descriptive factors correlate with univariate heritability estimates. Weights were estimated using the squares of the standard errors of the univariate heritability estimates from the LD score regression analysis.

## Supplementary text

### Effect of co-morbidity and phenotypic misclassification on correlation estimates

We derived a formula to quantify the effect of case misclassification on the estimated genetic correlation between two traits, given the degree of misclassification, the observed heritability and the true genetic correlation. We assume both traits have similar sample and population prevalence.

Let  $\lambda$  be the fraction of correctly classified cases of phenotype 1, with the remainder being cases of phenotype 2 misclassified as cases of phenotype 1,  $\beta_1$  and  $\beta_2$  be true effects for phenotypes 1 and 2 on an arbitrary SNP. Therefore, the effect of the SNP on the misspecified phenotype 1 is  $\alpha$ :

$$\alpha \equiv \lambda\beta_1 + (1 - \lambda)\beta_2$$

Before considering the impact on the estimated genetic correlation, we note that this change in SNP effects means the heritability of the observed (potentially misclassified) phenotype may differ from the heritability of the true phenotype 1. Noting that the observed heritability for each phenotype is proportional to the variance of their effect sizes, we first calculate

$$\begin{aligned} \text{Var}(\alpha) &= \text{Var}(\lambda\beta_1 + (1 - \lambda)\beta_2) \\ &= \lambda^2 \text{Var}(\beta_1) + 2\lambda(1 - \lambda)\text{Cov}(\beta_1, \beta_2) + (1 - \lambda)^2 \text{Var}(\beta_2) \\ &= \lambda^2 \text{Var}(\beta_1) + 2\lambda(1 - \lambda)r_g\sqrt{\text{Var}(\beta_1)\text{Var}(\beta_2)} + (1 - \lambda)^2 \text{Var}(\beta_2) \end{aligned}$$

Then assuming standardized regression coefficients (e.g. following the LD score regression model), this can be written in terms of observed (obs) and true heritabilities for the two phenotypes and the number of genome-wide variants  $M$  as

$$\begin{aligned} \frac{h_{1,obs}^2}{M} &= \lambda^2 \frac{h_1^2}{M} + 2\lambda(1 - \lambda)r_g\sqrt{\frac{h_1^2}{M}\frac{h_2^2}{M}} + (1 - \lambda)^2 \frac{h_2^2}{M} \\ h_{1,obs}^2 &= \lambda^2 h_1^2 + 2\lambda(1 - \lambda)r_g\sqrt{h_1^2 h_2^2} + (1 - \lambda)^2 h_2^2 \end{aligned}$$

This allows solving for  $\sqrt{h_1^2}$  using a quadratic equation,

$$0 = \lambda^2 h_1^2 + 2\lambda(1-\lambda)r_g \sqrt{h_1^2 h_2^2} + (1-\lambda)^2 h_2^2 - h_{1,obs}^2$$

$$\begin{aligned} \sqrt{h_1^2} &= \frac{-2\lambda(1-\lambda)r_g \sqrt{h_2^2} \pm \sqrt{4\lambda^2(1-\lambda)^2 r_g^2 h_2^2 - 4\lambda^2[(1-\lambda)^2 h_2^2 - h_{1,obs}^2]}}{2\lambda^2} \\ &= \frac{-2\lambda(1-\lambda)r_g \sqrt{h_2^2} \pm 2\lambda \sqrt{(1-\lambda)^2(r_g^2 - 1)h_2^2 + h_{1,obs}^2}}{2\lambda^2} \\ &= \frac{-(1-\lambda)r_g \sqrt{h_2^2} \pm \sqrt{(1-\lambda)^2(r_g^2 - 1)h_2^2 + h_{1,obs}^2}}{\lambda} \end{aligned}$$

Note that the sign of the first term in the numerator will be opposite of the sign of  $r_g$ . Therefore if we select the sign of the phenotype so that  $r_g > 0$ , then we must add the second term to ensure  $\sqrt{h_1^2} > 0$ . This gives us

$$\sqrt{h_1^2} = \frac{-(1-\lambda)r_g \sqrt{h_2^2} + \sqrt{(1-\lambda)^2(r_g^2 - 1)h_2^2 + h_{1,obs}^2}}{\lambda}$$

Note that this will not be bounded above by one when  $\lambda$  is small. This is not surprising since a small  $\lambda$  implies that most of the cases reported for phenotype 1 are in fact cases for phenotype 2, making particular combinations of  $h_2^2$ ,  $h_{1,obs}^2$  and  $r_g$  infeasible for certain values of  $\lambda$ . From the above, the determinant of the quadratic form must be positive, thus

$$h_{1,obs}^2 \geq (1-\lambda)^2(1-r_g^2)h_2^2$$

Similarly, the determinant of the quadratic formula, solving for  $h_2^2$ , implies

$$h_2^2 \leq \frac{h_{1,obs}^2}{\lambda^2(1-r_g^2)}$$

This is the case unless no misclassification is present ( $\lambda = 0$ ) or the phenotypes are functionally equivalent ( $r_g^2 = 1$ ).

We can now return to the original question regarding the relationship between  $r_g$  and  $r_{g,obs}$  in the presence of phenotype misclassification. We derive for the SNP effects of  $\alpha$  and  $\beta_2$ :

$$\begin{aligned} r_{g,obs} &\equiv \text{Corr}(\alpha, \beta_2) \\ &= \frac{\text{Cov}(\alpha, \beta_2)}{\sqrt{\text{Var}(\alpha)\text{Var}(\beta_2)}} \\ &= \frac{\text{Cov}[\lambda\beta_1 + (1-\lambda)\beta_2, \beta_2]}{\sqrt{\text{Var}(\alpha)\text{Var}(\beta_2)}} \end{aligned}$$

$$\begin{aligned}
&= \frac{\lambda \text{Cov}(\beta_1, \beta_2) + (1 - \lambda) \text{Var}(\beta_2)}{\sqrt{\text{Var}(\alpha)\text{Var}(\beta_2)}} \\
&= \frac{\lambda r_g \sqrt{\text{Var}(\beta_1) \text{Var}(\beta_2)} + (1 - \lambda) \text{Var}(\beta_2)}{\sqrt{\text{Var}(\alpha)\text{Var}(\beta_2)}} \\
&= \lambda r_g \frac{\sqrt{\text{Var}(\beta_1)}}{\sqrt{\text{Var}(\alpha)}} + (1 - \lambda) \frac{\sqrt{\text{Var}(\beta_2)}}{\sqrt{\text{Var}(\alpha)}}
\end{aligned}$$

Again assuming standardized regression coefficients, the variances can be written in terms of heritability as

$$r_{g,obs} = \frac{\lambda r_g \sqrt{h_1^2} + (1 - \lambda) \sqrt{h_2^2}}{\sqrt{h_{1,obs}^2}}$$

Rearranging and substituting the expression for  $\sqrt{h_1^2}$  from above, assuming  $r_g > 0$ , gives

$$\begin{aligned}
r_g &= \frac{r_{g,obs} \sqrt{h_{1,obs}^2} - (1 - \lambda) \sqrt{h_2^2}}{\lambda \sqrt{h_1^2}} \\
&= \frac{r_{g,obs} \sqrt{h_{1,obs}^2} - (1 - \lambda) \sqrt{h_2^2}}{\lambda} \frac{\lambda}{-(1 - \lambda) r_g \sqrt{h_2^2} + \sqrt{(1 - \lambda)^2 (r_g^2 - 1) h_2^2 + h_{1,obs}^2}} \\
&= \frac{r_{g,obs} \sqrt{h_{1,obs}^2} - (1 - \lambda) \sqrt{h_2^2}}{\sqrt{(1 - \lambda)^2 (r_g^2 - 1) h_2^2 + h_{1,obs}^2} - (1 - \lambda) r_g \sqrt{h_2^2}}
\end{aligned}$$

Note that in the case with no misclassification, i.e.  $\lambda = 1$ ,

$$r_g = \frac{r_{g,obs} \sqrt{h_{1,obs}^2}}{\sqrt{h_{1,obs}^2}} = r_{g,obs}$$

To examine the effects of co-morbidity has on the estimates, Table S5 shows numerical solutions for the estimated true correlation of some selected disorder pairs based on literature estimates of co-morbidity, assuming unidirectional misclassification and that  $h_{1,obs}^2$  is equal to true  $h_1^2$  (ie. that both disorders are roughly as heritable). For this table, we substituted the lambda values (see table for reference) and used the formula above to estimate what the true  $r_g$  would be, based on the observed  $r_g$  in this study. Figure S8 shows how the true genetic correlation estimates for those pairs behave across a range of  $\lambda$  values, given the observed  $r_g$  in this study, under the same assumptions as Table S5.

We further estimate what degree of unidirectional misclassification would be required to produce the significant  $r_g$  values we observe in the paper, in the absence of any true correlation. Given  $r_g = 0$ ,

$$r_{g,obs} = \frac{(1 - \lambda)\sqrt{h_2^2}}{h_{1,obs}^2}$$

$$\lambda = 1 - r_{g,obs} \frac{h_{1,obs}^2}{\sqrt{h_2^2}}$$

Table S6 lists the implied values of misclassification ( $1-\lambda$ ) required to produce the observed significant  $r_g$  values between brain disorders in the study, if no true correlation between the phenotypes exists.

#### Study-specific acknowledgments

##### IGAP (Alzheimer's disease)

We thank the International Genomics of Alzheimer's Project (IGAP) for providing summary results data for these analyses. The investigators within IGAP contributed to the design and implementation of IGAP and/or provided data but did not all directly participate in the analysis or writing of this report. IGAP was made possible by the generous participation of the control subjects, the patients, and their families. The i-Select chips was funded by the French National Foundation on Alzheimer's disease and related disorders. EADI was supported by the LABEX (laboratory of excellence program investment for the future) DISTALZ grant, Inserm, Institut Pasteur de Lille, Université de Lille 2 and the Lille University Hospital. GERAD was supported by the Medical Research Council (Grant n° 503480), Alzheimer's Research UK (Grant n° 503176), the Wellcome Trust (Grant n° 082604/2/07/Z) and German Federal Ministry of Education and Research (BMBF): Competence Network Dementia (CND) grant n° 01GI0102, 01GI0711, 01GI0420. CHARGE was partly supported by the NIH/NIA grant R01 AG033193 and the NIA AG081220 and AGES contract N01-AG-12100, the NHLBI grant R01 HL105756, the Icelandic Heart Association, and the Erasmus Medical Center and Erasmus University. ADGC was supported by the NIH/NIA grants: U01 AG032984, U24 AG021886, U01 AG016976, and the Alzheimer's Association grant ADGC-10-196728.

##### IHGC (Migraine)

We would like to thank the numerous individuals who contributed to sample collection, storage, handling, phenotyping and genotyping within each of the individual cohorts. We also thank the important contribution to research made by the study participants. This work was supported by the National Human Genome Research Institute of the National Institutes of Health (grant number R44HG006981) for 23andme and the UK Medical Research Council and the Wellcome Trust (Grant ref: 102215/2/13/2) and the University of Bristol for ALSPAC. The Australian cohort was supported by National Institutes of Health (NIH) Grants AA07535, AA07728, AA13320, AA13321, AA14041, AA11998, AA17688, DA012854, DA019951, AA010249, AA013320, AA013321, AA011998, AA017688, and DA027995; by Grants from the Australian National Health



and Medical Research Council (NHMRC) (241944, 339462, 389927, 389875, 389891, 389892, 389938, 442915, 442981, 496739, 552485, 552498 and 1075175); by Grants from the Australian Research Council (ARC) (A7960034, A79906588, A79801419, DP0770096, DP0212016, and DP0343921); by the EU- funded GenomEUtwin (FP5-QLG2- CT- 2002- 01254) and ENGAGE (FP7- HEALTH- 201413) projects; and by the European Union's Seventh Framework program (2007–2013) under grant agreement no. 602633 (EUROHEADPAIN). DRN (FT0991022, 613674) and GWM (619667) were supported by the ARC Future Fellowship and NHMRC Fellowship Schemes. We thank P Visscher, D Duffy, A Henders, B Usher, E Souzeau, A Kuot, A McMellon, MJ Wright, MJ Campbell, A Caracella, L Bowdler, S Smith, B Haddon, A Conciatore, D Smyth, H Beeby, O Zheng and B Chapman for their input into project management, databases, phenotype collection, and sample collection, processing and genotyping. We acknowledge use of phenotype and genotype data from the British 1958 Birth Cohort DNA collection, funded by the Medical Research Council grant G0000934 and the Wellcome Trust grant 068545/Z/02. Genotyping for the B58C-WTCCC subset was funded by the Wellcome Trust grant 076113/B/04/Z. The B58C-T1DGC genotyping utilized resources provided by the Type 1 Diabetes Genetics Consortium, a collaborative clinical study sponsored by the National Institute of Diabetes and Digestive and Kidney Diseases (NIDDK), National Institute of Allergy and Infectious Diseases (NIAID), National Human Genome Research Institute (NHGRI), National Institute of Child Health and Human Development (NICHD), and Juvenile Diabetes Research Foundation International (JDRF) and supported by U01 DK062418. B58C-T1DGC GWAS data were deposited by the Diabetes and Inflammation Laboratory, Cambridge Institute for Medical Research (CIMR), University of Cambridge, which is funded by Juvenile Diabetes Research Foundation International, the Wellcome Trust and the National Institute for Health Research Cambridge Biomedical Research Centre; the CIMR is in receipt of a Wellcome Trust Strategic Award (079895). The B58C-GABRIEL genotyping was supported by a contract from the European Commission Framework Programme 6 (018996) and grants from the French Ministry of Research. The Danish HC study is funded by grants from The Advanced Technology Foundation (001-2009-2), The Lundbeck Foundation (R34-A3243), and The Lundbeck Foundation Initiative for Integrative Psychiatric Research (R102-A9118). The deCODE migraine study was funded in part by the European Commission (HEALTH-FP7-2013-Innovation-602891 to the NeuroPain Consortium) and the National Institute of Dental and Craniofacial Research (NIH R01DE022905). EGCUT received targeted financing from Estonian Research Council grant IUT20-60, Center of Excellence in Genomics (EXCEGEN) and University of Tartu (SP1GVARENG). We acknowledge EGCUT technical personnel, especially Mr V. Soo and S. Smit. Data analyses were carried out in part in the High Performance Computing Center of University of Tartu. For the Finnish MA cohort, the Wellcome Trust (grants WT089062 and 098051 to A.P. ), the Academy of Finland (grants 200923, 251704, and 286500 to A.P., and 139795 to M.W.); the Academy of Finland Center of Excellence for Complex Disease Genetics; the EuroHead project (LSM-CT-2004-504837); the Academy of Finland, Center of Excellence in Complex Disease Genetics, (grant numbers 213506 and 129680 to A.P. and J.K.); FP7-EUROHEADPAIN-no.602633, ENGAGE Consortium (grant agreement HEALTH-F4-2007-201413); EU/SYNSYS-Synaptic Systems (grant number 242167 to A.P.); the

Sigrid Juselius Foundation, Finland (to A.P.); the Folkhälsan Research Foundation, Finland (to M.W.); Medicinska Understödsföreningen Liv & Hälsa (to M.W.), and the Helsinki University Central Hospital (to M.K., V.A.). German MA/MO (Munich): This study was supported by the Corona Foundation (S199/10052/2011). Health 2000: The Health 2000 survey was funded by the Finnish National Institute for Health and Welfare (THL) in collaboration with the National Social Insurance Institution and the five university hospital districts. VS was supported by the Academy of Finland, grant #139635, and the Finnish Foundation for Cardiovascular Research. The NFBC1966 sample received financial support from the Academy of Finland (project grants 104781, 120315, 129269, 1114194, 24300796, Center of Excellence in Complex Disease Genetics and SALVE), University Hospital Oulu, Biocenter, University of Oulu, Finland (75617), NHLBI grant 5R01HL087679-02 through the STAMPEED program (1RL1MH083268-01), NIH/NIMH (5R01MH63706:02), ENGAGE project and grant agreement HEALTH-F4-2007-201413, EU FP7 EurHEALTHAgeing -277849, the Medical Research Council, UK (G0500539, G0600705, G1002319, PrevMetSyn/SALVE) and the MRC, Centenary Early Career Award. The program is currently being funded by the H2020-633595 DynaHEALTH action and academy of Finland EGEEA-project. For NTR/NESDA, we acknowledge the Netherlands Organisation for Scientific Research (NWO), the Netherlands Organisation for Health Research and Development (ZonMW), the EMGO+ Institute for Health and Care Research, the Neuroscience Campus Amsterdam, BBMRI-NL (184.021.007: Biobanking and Biomolecular Resources Research Infrastructure), the Avera Institute, Sioux Falls, South Dakota (USA), Rutgers University Cell and DNA Repository cooperative agreement [National Institute of Mental Health U24 MH068457-06], and the National Institutes of Health (NIH R01 HD042157-01A1, MH081802, Grand Opportunity grants 1RC2 MH089951 and 1RC2 MH089995). Part of the genotyping and analyses were funded by the Genetic Association Information Network (GAIN) of the Foundation for the National Institutes of Health. Genotyping was funded in part by grants from the National Institutes of Health (4R37DA018673-06, RC2 MH089951). The statistical analyses were carried out on the Genetic Cluster Computer (<http://www.geneticcluster.org>) which is supported by the Netherlands Scientific Organization (NWO 480-05-003), the Dutch Brain Foundation and the Department of Psychology and Education of the VU University Amsterdam. The Netherlands Twin register was also supported by ZonMW Addiction 31160008; ZonMW 940-37-024; NWO/SPI 56-464-14192; NWO-400-05-717; NWO-MW 904-61-19; NWO-MagW 480-04-004; NWO-Veni 016-115-035 and the European Research Council (ERC 230374, 284167). The Netherlands Study of Depression and Anxiety (NESDA) was also funded by ZonMW (Geestkracht program grant 10-000-1002). The generation and management of GWAS genotype data for the Rotterdam Study (RS I, RS II, RS III) was executed by the Human Genotyping Facility of the Genetic Laboratory of the Department of Internal Medicine, Erasmus MC, Rotterdam, The Netherlands. The GWAS datasets are supported by the Netherlands Organisation of Scientific Research NWO Investments (nr. 175.010.2005.011, 911-03-012), the Genetic Laboratory of the Department of Internal Medicine, Erasmus MC, the Research Institute for Diseases in the Elderly (014-93-015; RIDE2), the Netherlands Genomics Initiative (NGI)/Netherlands Organisation for Scientific Research (NWO) Netherlands Consortium for Healthy Aging (NCHA), project nr. 050-060-810. We thank Pascal Arp, Mila Jhamai, Marijn Verkerk, Lizbeth Herrera

and Marjolein Peters, MSc, and Carolina Medina-Gomez, MSc, for their help in creating the GWAS database, and Karol Estrada, PhD, Yurii Aulchenko, PhD, and Carolina Medina-Gomez, MSc, for the creation and analysis of imputed data. The Rotterdam Study is funded by Erasmus Medical Center and Erasmus University, Rotterdam, Netherlands Organization for the Health Research and Development (ZonMw), the Research Institute for Diseases in the Elderly (RIDE), the Ministry of Education, Culture and Science, the Ministry for Health, Welfare and Sports, the European Commission (DG XII), and the Municipality of Rotterdam. The authors are grateful to the study participants, the staff from the Rotterdam Study and the participating general practitioners and pharmacists. The Swedish Twin Registry acknowledges funding support from the Swedish Research Council, Swedish Brain Foundation, Karolinska Institutet Research Funds, and the Åke Wibergs Stiftelse. The WGHS is supported by HL043851 and HL080467 from the National Heart, Lung, and Blood Institute and CA047988 from the National Cancer Institute with collaborative scientific support and funding for genotyping provided by Amgen. Young Finns: The Young Finns Study has been financially supported by the Academy of Finland: grants 286284 (T.L.), 134309 (Eye), 126925, 121584, 124282, 129378 (Salve), 117787 (Gendi), and 41071 (Skidi); the Social Insurance Institution of Finland; Kuopio, Tampere and Turku University Hospital Medical Funds (grant X51001 for T.L.); Juho Vainio Foundation; Paavo Nurmi Foundation; Finnish Foundation of Cardiovascular Research (T.L.); Finnish Cultural Foundation; Tampere Tuberculosis Foundation (T.L.); Emil Aaltonen Foundation (T.L.); and Yrjö Jahnsson Foundation (T.L.). We gratefully acknowledge the THL DNA laboratory for its skilful work to produce the DNA samples used in this study, and Ville Aalto and Irina Lisinen for the expert technical assistance in the statistical analyses. Ester Cuenca-Leon is supported by a 'Beatriu de Pinós' grant (2010 BP-A and BP-A2) funded by AGAUR, Generalitat de Catalunya. Phil H. Lee is supported by NIMH K99 MH101367. Tune H. Pers is supported by the Alfred Benzon Foundation.

#### IPDGC (Parkinson's disease)

We would like to thank all of the subjects who donated their time and biological samples to be a part of this study. This work was supported in part by the Intramural Research Programs of the National Institute of Neurological Disorders and Stroke (NINDS), the National Institute on Aging (NIA), and the National Institute of Environmental Health Sciences both part of the National Institutes of Health, Department of Health and Human Services; project numbers Z01-AG000949-02 and Z01-ES101986. In addition, this work was supported by the Department of Defense (award W81XWH-09-2-0128), and The Michael J Fox Foundation for Parkinson's Research. This work was supported by National Institutes of Health grants R01NS037167, R01CA141668, P50NS071674, American Parkinson Disease Association (APDA); Barnes Jewish Hospital Foundation; Greater St Louis Chapter of the APDA; Hersenstichting Nederland; Neuroscience Campus Amsterdam; and the section of medical genomics, the Prinses Beatrix Fonds. The KORA (Cooperative Research in the Region of Augsburg) research platform was started and financed by the Forschungszentrum für Umwelt und Gesundheit, which is funded by the German Federal Ministry of Education, Science, Research, and Technology and by the State of Bavaria. This study was also funded by the German National Genome Network (NGFNplus number 01GS08134, German Ministry

for Education and Research); by the German Federal Ministry of Education and Research (NGFN 01GR0468, PopGen); and 01EW0908 in the frame of ERA-NET NEURON and Helmholtz Alliance Mental Health in an Ageing Society (HA-215), which was funded by the Initiative and Networking Fund of the Helmholtz Association. The French GWAS work was supported by the French National Agency of Research (ANR-08-MNP-012). This study was also funded by France-Parkinson Association, the French program “Investissements d’avenir” funding (ANR-10-IAIHU-06) and a grant from Assistance Publique-Hôpitaux de Paris (PHRC, AOR-08010) for the French clinical data. This study was also sponsored by the Landspítali University Hospital Research Fund (grant to SSv); Icelandic Research Council (grant to SSv); and European Community Framework Programme 7, People Programme, and IAPP on novel genetic and phenotypic markers of Parkinson’s disease and Essential Tremor (MarkMD), contract number PIAP-GA-2008-230596 MarkMD (to HP and JHu). This study utilized the high-performance computational capabilities of the Biowulf Linux cluster at the National Institutes of Health, Bethesda, Md. (<http://biowulf.nih.gov>), and DNA panels, samples, and clinical data from the National Institute of Neurological Disorders and Stroke Human Genetics Resource Center DNA and Cell Line Repository. People who contributed samples are acknowledged in descriptions of every panel on the repository website. We thank the French Parkinson’s Disease Genetics Study Group and the Drug Interaction with genes (DIGPD) study group: Y Agid, M Anheim, A-M Bonnet, M Borg, A Brice, E Broussolle, J-C Corvol, P Damier, A Destée, A Dürr, F Durif, A Elbaz, D Grabil, S Klebe, P. Krack, E Lohmann, L. Lacomblez, M Martinez, V Mesnage, P Pollak, O Rascol, F Tison, C Tranchant, M Vérin, F Viallet, and M Vidailhet. We also thank the members of the French 3C Consortium: A Alpérovitch, C Berr, C Tzourio, and P Amouyel for allowing us to use part of the 3C cohort, and D Zelenika for support in generating the genome-wide molecular data. We thank P Tienari (Molecular Neurology Programme, Biomedicum, University of Helsinki), T Peuralinna (Department of Neurology, Helsinki University Central Hospital), L Myllykangas (Folkhalsan Institute of Genetics and Department of Pathology, University of Helsinki), and R Sulkava (Department of Public Health and General Practice Division of Geriatrics, University of Eastern Finland) for the Finnish controls (Vantaa85+ GWAS data). We used genome-wide association data generated by the Wellcome Trust Case-Control Consortium 2 (WTCCC2) from UK patients with Parkinson’s disease and UK control individuals from the 1958 Birth Cohort and National Blood Service. Genotyping of UK replication cases on ImmunoChip was part of the WTCCC2 project, which was funded by the Wellcome Trust (083948/Z/07/Z). UK population control data was made available through WTCCC1. This study was supported by the Medical Research Council and Wellcome Trust disease centre (grant WT089698/Z/09/Z to NW, JHa, and ASc). As with previous IPDGC efforts, this study makes use of data generated by the Wellcome Trust Case-Control Consortium. A full list of the investigators who contributed to the generation of the data is available from [www.wtccc.org.uk](http://www.wtccc.org.uk). Funding for the project was provided by the Wellcome Trust under award 076113, 085475 and 090355. This study was also supported by Parkinson’s UK (grants 8047 and J-0804) and the Medical Research Council (G0700943 and G1100643). We thank Jeffrey Barrett and Jason Downing for assistance with the design of the ImmunoChip and NeuroX arrays. DNA extraction work that was done in the UK was undertaken at University College London Hospitals, University College London, who

received a proportion of funding from the Department of Health's National Institute for Health Research Biomedical Research Centres funding. This study was supported in part by the Wellcome Trust/Medical Research Council Joint Call in Neurodegeneration award (WT089698) to the Parkinson's Disease Consortium (UKPDC), whose members are from the UCL Institute of Neurology, University of Sheffield, and the Medical Research Council Protein Phosphorylation Unit at the University of Dundee. Mike Nalls' participation is supported by a consulting contract between Kelly Services and the National Institute on Aging, NIH, Bethesda, MD, USA. Faraz Faghri's contribution to this work has been supported in part through the RDA/US Data Share grant from the Alfred P. Sloan Foundation #G-2014-13746 and supported by grant 1U54GM114838 awarded by NIGMS through funds provided by the trans-NIH big data to Knowledge (BD2K) initiative ([www.bd2k.nih.gov](http://www.bd2k.nih.gov)) and a collaborative award from the National Science Foundation (NSF award numbers CNS-1329686, CNS-1329737, CNS-1330142, and CNS-1330491). This work was supported by the Medical Research Council grant MR/N026004/1.

#### METASTROKE consortium of the International Stroke Genetics Consortium (Ischemic stroke)

This project has received funding from the European Union's Horizon 2020 research and innovation programme under grant agreements No 666881, SVDs@target (to M Dichgans) and No 667375, CoSTREAM (to M Dichgans); the DFG as part of the Munich Cluster for Systems Neurology (EXC 1010 SyNergy) and the CRC 1123 (B3)(to M Dichgans); the Corona Foundation (to M Dichgans); the Fondation Leducq (Transatlantic Network of Excellence on the Pathogenesis of Small Vessel Disease of the Brain)(to M Dichgans); the e:Med program (e:AtheroSysMed) (to M Dichgans) and the FP7/2007-2103 European Union project CVgenes@target (grant agreement number Health-F2-2013-601456) (to M Dichgans).

#### Eating Disorders Working Group of the Psychiatric Genomics Consortium (Anorexia nervosa)

Data on anorexia nervosa were made possible by funding for the Genetic Consortium on Anorexia Nervosa by the Wellcome Trust Case Control Consortium 3 project titled "A Genome-Wide Association Study of Anorexia Nervosa" (WT088827/Z/09) and the Foundation of Hope, Raleigh, North Carolina, USA. Funding for the Children's Hospital of Pennsylvania and Price Foundation study was from the Price Foundation, the Klarman Family Foundation, Scripps Translational Sciences Institute Clinical Translational Science Award [Grant Number U54 RR0252204-01], Institute Development Award to the Center for Applied Genomics from the CHOP; 2011 - 2014 Davis Foundation Postdoctoral Fellowship Program in Eating Disorders Research Award, Yiran Guo; 2012 - 2015 Davis Foundation Postdoctoral Fellowship Program in Eating Disorders Research Award, Dong Li.

#### Major Depressive Disorder Working Group of the Psychiatric Genomics Consortium

This work was funded by the German Research Foundation (DFG, grant FOR2107 DA1151/5-1 to UD; SFB-TRR58, Project C09 to UD) and the Interdisciplinary Center

for Clinical Research (IZKF) of the medical faculty of Münster (grant Dan3/012/17 to UD).

Tourette Syndrome and Obsessive Compulsive Disorder Working Group of the Psychiatric Genomics Consortium (Tourette Syndrome and Obsessive Compulsive Disorder)

This study was supported by Grants from the National Institute of Mental Health [R01MH092290; R01MH092291; R01MH092292; R01MH092293; R01MH092513; R01MH092516; R01MH092520; R01MH092289; U24MH068457] and the New Jersey Center for Tourette Syndrome and Associated Disorders (NJCTS).

#### Consortium memberships

IGAP (Alzheimer's disease)

Benjamin Grenier-Boley, Vincent Chouraki, Yoichiro Kamatani, Marie-Thérèse Bihoreau, Florence Pasquier, Olivier Hanon, Dominique Campion, Claudine Berr, Luc Letenneur, Nathalie Fievet, Alexis Brice, Didier Hannequin, Karen Ritchie, Jean-Francois Dartigues, Christophe Tzourio, Philippe Amouyel, Anne Boland, Jean-François Deleuze, Jacques Epelbaum, Emmanuelle Duron, Bruno Dubois, Adam C. Naj, Gyungah Jun, Gary W. Beecham, Badri N. Vardarajan, Brian Kunkle, Christiane Reitz, Joseph D. Buxbaum, Paul K. Crane, Philip L. De Jager, Alison M. Goate, Matthew J. Huentelman, M. Ilyas Kamboh, Eric B. Larson, Oscar L. Lopez, Amanda J. Myers, Ekaterina Rogaeva, Peter St George-Hyslop, Debby W. Tsuang, John R. Gilbert, Hakon Hakonarson, Duane Beekly, Kara L. Hamilton-Nelson, Kelley M. Faber, Laura B. Cantwell, Deborah Blacker, David A. Bennett, Tatiana M. Foroud, Walter A. Kukull, Kathryn L. Lunetta, Eden R. Martin, Li-San Wang, Richard Mayeux, Jonathan L. Haines, Margaret A. Pericak-Vance, Lindsay A. Farrer, Gerard D. Schellenberg, Deborah C. Mash, Roger L. Albin, Liana G. Apostolova, Steven E. Arnold, Clinton T. Baldwin, Lisa L. Barnes, Thomas G. Beach, Thomas D. Bird, Bradley F. Boeve, James D. Bowen, James R. Burke, Minerva M. Carrasquillo, Steven L. Carroll, Lori B. Chibnik, David G. Clark, Carlos Cruchaga, Charles DeCarli, F. Yesim Demirci, Malcolm Dick, Kenneth B. Fallon, Martin R. Farlow, Steven Ferris, Douglas R. Galasko, Piyush Gampawar, Yasaman Saba, Marla Gearing, Daniel H. Geschwind, Neill R. Graff-Radford, Ronald L. Hamilton, John Hardy, Elizabeth Head, Lawrence S. Honig, Christine M. Hulette, Bradley T. Hyman, Gail P. Jarvik, Gregory A. Jicha, Lee-Way Jin, Anna Karydas, John S.K. Kauwe, Jeffrey A. Kaye, Ronald Kim, Edward H. Koo, Neil W. Kowall, Frank M. LaFerla, James B. Leverenz, Allan I. Levey, Ge Li, Andrew P. Lieberman, Constantine G. Lyketsos, Wayne C. McCormick, Susan M. McCurry, Carol A. Miller, Jill R. Murrell, John M. Olichney, Vernon S. Pankratz, Aimee Pierce, Wayne W. Poon, Joseph F. Quinn, Murray Raskind, Barry Reisberg, Erik D. Roberson, Mary Sano, Andrew J. Saykin, Julie A. Schneider, Lon S. Schneider, William W. Seeley, Helena Schmidt, Albert V. Smith, Amanda G. Smith, Joshua A. Sonnen, Salvatore Spina, Robert A. Stern, Rudolph E. Tanzi, John Q. Trojanowski, Vivianna M. Van Deerlin, Linda J. Van Eldik, Sandra Weintraub, Kathleen A. Welsh-Bohmer, Randall L. Woltjer, Chang-En Yu, Robert Barber, Denise Harold, Rebecca Sims, Giancarlo Russo, Nicola Jones, Melanie L. Dunstan, Alfredo Ramirez, Janet A. Johnston, David C. Rubinsztein, Michael Gill, John Gallacher, Anthony Bayer, Magda Tsolaki, Petra Proitsi, John Collinge, Nick C. Fox, John Hardy, Robert Clarke,

Carol Brayne, Susanne Moebus, Wolfgang Maier, Harald Hampel, Sabrina Pichler, Alison Goate, Minerva M. Carrasquillo, Steven G. Younkin, Michael J. Owen, Michael C. O'Donovan, Simon Mead, Peter Passmore, Kevin Morgan, John F. Powell, John S.K. Kauwe, Carlos Cruchaga, Matthias Riemenschneider, Markus M. Nöthen, Lesley Jones, Peter A. Holmans, Valentina Escott-Price, Julie Williams, Patrick G. Kehoe, Jason D. Warren, Jonathan M. Schott, Natalie Ryan, Martin Rossor, Yoav Ben-Shlomo, Michelle K. Lupton, Steffi Riedel-Heller, Martin Dichgans, Reiner Heun, Per Hoffmann, Johannes Kornhuber, Hendrik van den Bussche, Brian Lawlor, Aoibhinn Lynch, David Mann, Isabella Heuser, Lutz Frölich, John C. Morris, Andrew McQuillin, Ammar Al-Chalabi, Christopher E. Shaw, Andrew B. Singleton, Rita Guerreiro, Karl-Heinz Jöckel, H-Erich Wichmann, Dennis W. Dickson, Ronald C. Petersen, Carla A. Ibrahim-Verbaas, Anita L. DeStefano, Joshua C. Bis, M. Arfan Ikram, Agustín Ruiz, Seung-Hoan Choi, Vilmundur Gudnason, Najaf Amin, Oscar L. Lopez, Gudny Eiriksdottir, Thomas H. Mosley Jr., Tamara B. Harris, Jerome I. Rotter, Michael A. Nalls, Palmi V. Jonsson, Mercè Boada, Albert Hofman, Lenore J. Launer, Cornelia M. van Duijn, Sudha Seshadri, Alexa Beiser, Stephanie Debette, Qiong Yang, Galit Weinstein, Jing Wang, Andre G. Uitterlinden, Peter J. Koudstaal, William T. Longstreth, Jr, James T. Becker, Thomas Lumley, Kenneth Rice, Peter Dal-Bianco, Gerhard Ransmayr, Thomas Benke, Sven J. van der Lee, Jan Bressler, Myriam Fornage, Isabel Hernández, Ana Mauleón and Montserrat Alegret

#### IHGC (Migraine)

Padhraig Gormley, Verneri Anttila, Bendik S. Winsvold, Priit Palta, Tonu Esko, Kai-How Farh, Ester Cuenca-Leon, Mikko Muona, Nicholas A. Furlotte, Tobias Kurth, George McMahon, Lannie Lighthart, Gisela M. Terwindt, Mikko Kallela, Rainer Malik, Caroline Ran, Scott D. Gordon, Stacy Steinberg, Guntram Borck, Markku Koiranen, Hieab H.H. Adams, Terho Lehtimäki, Antti-Pekka Sarin, Juho Wedenoja, Lydia Quaye, David A. Hinds, Julie E. Buring, Markus Schürks, Paul M. Ridker, Maria Gudlaug Hrafnisdottir, Jouke-Jan Hottenga, Brenda WJH Penninx, Markus Färkkilä, Ville Artto, Mari Kaunisto, Salli Vepsäläinen, Tobias M. Freilinger, Pamela A F. Madden, Nicholas G. Martin, Grant W. Montgomery, Eija Hamalainen, Hailiang Huang, Lude Franke, Jie Huang, Evie Stergiakouli, Phil H. Lee, Cynthia Sandor, Caleb Webber, Zameel Cader, Bertram Muller-Myhsok, Stefan Schreiber, Thomas Meitinger, Johan Eriksson, Veikko Salomaa, Kauko Heikkilä, Elizabeth Loehrer, Andre G. Uitterlinden, Albert Hofman, Cornelia M. van Duijn, Lynn Cherkas, Audun Stubhaug, Christopher S. Nielsen, Minna Männikko, Evelin Mihailov, Lili Milani, Hartmut Göbel, Ann-Louise Esserlind, Anne Francke Christensen, Thomas Folkmann Hansen, Thomas Werge, Bru Cormand, Lyn Griffiths, Marjo Hiekkala, Alfons Macaya, Patricia Pozo-Rosich, Jaakko Kaprio, Arpo J. Aromaa, Olli Raitakari, M. Arfan Ikram, Tim Spector, Marjo-Riitta Järvelin, Andres Metspalu, Christian Kubisch, David P. Strachan, Michel D. Ferrari, Andrea C. Belin, Martin Dichgans, Maija Wessman, Arn MJM van den Maagdenberg, John-Anker Zwart, Dorret I. Boomsma, George Davey Smith, Nicholas Eriksson, Mark J. Daly, Benjamin M. Neale, Jes Olesen, Daniel I. Chasman, Dale R. Nyholt and Aarno Palotie

#### ILAE Consortium on Complex Epilepsies (Epilepsy)

Richard Anney, Andreja Avbersek, Larry Baum, Felicitas Becker, Samuel Berkovic, Jonathan Bradfield, Russell Buono, Claudia B. Catarino, Gianpiero Cavalleri, Stacey

Cherny, Alison Coffey, Patrick Cossette, Gerrit-Jan Haan, Peter De Jonghe, Carolien Kovel, Chantal Depondt, Dennis Dlugos, Colin Doherty, Thomas N. Ferraro, Martha Feucht, Andre Franke, Jacqueline French, Verena Gaus, Hongsheng Gui, Youling Guo, Hakon Hakonarson, Erin L. Heinzen, Ingo Helbig, Helle Hjalgrim, Jennifer Jamnadas-Khoda, Michael Johnson, Reetta Kälviäinen, Anne-Mari Kantanen, Dalia Kasperaviciute, Dorothee Trenite, Bobby Koeleman, Wolfram S. Kunz, Patrick Kwan, Yu Lau, Holger Lerche, Costin Leu, Wolfgang Lieb, Dick Lindhout, Warren Lo, Daniel Lowenstein, Alberto Malovini, Anthony Marson, Mark McCormack, James Mills, Martina Moerzinger, Rikke S. Møller, Anne Molloy, Hiltrud Muhle, Ping-Wing Ng, Markus M. Nöthen, Terence O'Brien, Karen Oliver, Aarno Palotie, Michael Privitera, Rodney Radtke, Philipp Reif, Ann-Kathrin Ruppert, Thomas Sander, Theresa Scattergood, Steven Schachter, Christoph Schankin, Ingrid Scheffer, Bettina Schmitz, Susanne Schoch, Pak Sham, Sanjay M. Sisodiya, David Smith, Philip Smith, Michael Sperling, Michael Steffens, Pasquale Striano, Hans Stroink, Rainer Surges, Meng Tan, G. Neil Thomas, Marian Todaro, Holger Trucks, Frank Visscher, Nicole Walley, Zhi Wei, Christopher D. Whelan, Wanling Yang, Federico Zara and Fritz Zimprich

IMSGC (Multiple sclerosis)

Chris Cotsapas

IPDGC (Parkinson's disease)

Jose Bras, Alexis Brice, Kin Y. Mok, Valentina Escott-Price, Thomas Foltynie, Thomas Gasser, Raphael Gibbs, Rita Guerreiro, John Hardy, Dena Hernandez, Peter Heutink, Peter Holmans, Suzanne Lesage, Steven Lubbe, Maria Martinez, Niccolo Mencacci, Huw R. Morris, Michael Nalls, Claudia Schulte, Manu Sharma, Mina Ryten, Joshua Shulman, Javier Simón-Sánchez, Andrew Singleton, Nigel Williams and Nicholas W. Wood

METASTROKE consortium of the International Stroke Genetics Consortium  
(Ischemic stroke)

Rainer Malik, Matthew Traylor, Sara Pulit, Steve Bevan, Jemma Hopewell, Elizabeth Holliday, Wei Zhao, Philippe Amouyel, John Attia, Thomas Battey, Klaus Berger, Giorgio Boncoraglio, Ganesh Chauhan, Wei-Min Chen, Ioana Cotlarciuc, Stephanie Debette, Guido J. Falcone, Andreea Ilinca, Steven Kittner, Christina Kourkoulis, Robin Lemmens, Arne Lindgren, James Meschia, Braxton Mitchell, Joana Pera, Peter Rothwell, Pankaj Sharma, Cathie Sudlow, Turgut Tatlisumak, Vincent Thijs, Astrid Vicente, Daniel Woo, Sudha Seshadri, Jonathan Rosand, Hugh Markus, Bradford Worrall and Martin Dichgans

International Stroke Genetics Consortium Study of Intracerebral Hemorrhage  
(Intracerebral Hemorrhage)

Miriam Raffeld, Guido J. Falcone, David Tirschwell, Bradford Worrall, Agnieszka Slowik, Magdy Selim, Jordi Jimenez-Conde, Daniel Woo, Scott Silliman, Arne Lindgren, James Meschia, Rainer Malik, Martin Dichgans and Jonathan Rosand



Attention-Deficit Hyperactivity Disorder Working Group of the Psychiatric Genomics Consortium (Attention-deficit hyperactivity disorder)

Stephen V. Faraone, Bru Cormand, Josep Antoni Ramos-Quiroga, Cristina Sánchez-Mora, Marta Ribasés, Miguel Casas, Amaia Hervas, Maria Jesús Arranz, Yufeng Wang, Jan Haavik, Tetyana Zayats, Stefan Johansson, Carol Mathews, Nigel Williams, Peter Holmans, Joanna Martin, Hakon Hakonarson, Josephine Elia, Tobias J. Renner, Benno G. Schimmelmann, Anke Hinney, Özgür Albayrak, Johannes Hebebrand, André Scherag, Astrid Dempfle, Beate Herpertz-Dahlmann, Judith Sinzig, Gerd Lehmkuhl, Aribert Rothenberger, Edmund J. S. Sonuga-Barke, Hans-Christoph Steinhausen, Jonna Kuntsi, Philip Asherson, Robert D. Oades, Tobias Banaschewski, Herbert Roeyers, Joseph Sergeant, Richard P. Ebstein, Sarah Hohmann, Barbara Franke, Jan K. Buitelaar, Lindsey Kent, Alejandro Arias Vasquez, Michael Gill, Nanda Lambregts-Rommelse, Richard JL Anney, Aisling Mulligan, Joseph Biederman, Yanli Zhang-James, Alysa E. Doyle, Andreas Reif, Klaus-Peter Lesch, Andreas Warnke, Christine M. Freitag, Susanne Walitza, Olga Rivero, Haukur Palmason, Jobst Meyer, Marcel Romanos, Anita Thapar, Kate Langley, Michael C. O'Donovan, Michael J. Owen, Marcella Rietschel, Stephanie H. Witt, Soeren Dalsgaard, Preben Bo Mortensen, Anders D. Børglum, Ditte Demontis, Joel Gelernter, Irwin Waldman, Joel Nigg, Beth Wilmot, Nikolas Molly, Luis Rohde, Claiton H. D. Bau, Eugenio H. Grevet, Mara Hutz, Nina Roth Mota, Eric Mick, Sarah E. Medland, Benjamin M. Neale, Raymond K. Walters, Mark J. Daly, Stephan Ripke, Alice Charach, Russell Schachar, Jennifer Crosbie, Sandra K. Loo, Susan L. Smalley and James J. McGough

Autism Spectrum Disorders Working Group of the Psychiatric Genomics Consortium (Autism)

Richard Anney, Stephan Ripke, Verner Anttila, Peter Holmans, Hailiang Huang, Phil H. Lee, Sarah Medland, Benjamin Neale, Elise Robinson, Lauren A. Weiss, Joana Almeida, Evdokia Anagnostou, Elena Bacchelli, Joel Bader, Anthony Bailey, Vanessa Bal, Agatino Battaglia, Raphael Bernier, Catalina Betancur, Sven Bölte, Patrick Bolton, Sean Brennan, Rita Cantor, Patrícia Celestino-Soper, Andreas G. Chiocchetti, Michael Cuccaro, Geraldine Dawson, Maretha De Jonge, Silvia De Rubeis, Richard Delorme, Frederico Duque, Sean Ennis, A. Gulhan Ercan-Sencicek, Eric Fombonne, Christine M. Freitag, Louise Gallagher, John Gilbert, Arthur Goldberg, Andrew Green, Dorothy Grice, Stephen Guter, Jonathan Haines, Robert Hendren, Christina Hultman, Sabine M. Klauck, Alexander Kolvezon, Christine Ladd-Acosta, Marion Leboyer, David Ledbetter, Christa Lese Martin, Pat Levitt, Jennifer Lowe, Elena Maestrini, Tiago Magalhaes, Shrikant Mane, Donna Martin, William McMahon, Alison Merikangas, Nancy Minshew, Anthony Monaco, Daniel Moreno-De-Luca, Eric Morrow, John Nurnberger, Guiomar Oliveira, Jeremy Parr, Margaret Pericak-Vance, Dalila Pinto, Regina Regan, Karola Rehnström, Abraham Reichenberg, Kathryn Roeder, Bernadette Rogé, Guy Rouleau, Sven Sandin, Gerard Schellenberg, Stephen Scherer, Stacy Steinberg, Astrid Vicente, Jacob Vorstman, Regina Waltes, Thomas Wassink, Ellen Wijsman, A. Jeremy Willsey, Lonnie Zwaigenbaum, Timothy Yu, Joseph Buxbaum, Edwin Cook, Hilary Coon, Daniel Geschwind, Michael Gill, Hakon Hakonarson, Joachim Hallmayer, Aarno Palotie, Susan Santangelo, James Sutcliffe, Dan Arking and Mark Daly

Bipolar Disorders Working Group of the Psychiatric Genomics Consortium (Bipolar disorder)

Marcella Rietschel, Thomas G. Schulze, Jana Strohmaier, Robert C. Thompson, Stephanie H. Witt, John Strauss, James L. Kennedy, John B. Vincent, Keith Matthews, Shaun Purcell, Douglas Ruderfer, Pamela Sklar, Jordan Smoller, Laura J. Scott, Margit Burmeister, Devin Absher, William E. Bunney, Huda Akil, Ole A. Andreassen, Srdjan Djurovic, Morten Mattingsdal, Ingrid Melle, Gunnar Morken, Aiden Corvin, Michael Gill, Derek Morris, Adebayo Anjorin, Nick Bass, Andrew McQuillin, Douglas Blackwood, Andrew McIntosh, Alan W. McLean, Walter J. Muir, Sarah E. Bergen, Vishwajit Nimgaonkar, Marian L. Hamshere, Christina Hultman, Mikael Landén, Paul Lichtenstein, Patrick Sullivan, Martin Schalling, Louise Frisé, Shaun Purcell, Eli Stahl, Amanda Dobbyn, Laura Huckins, Stéphane Jamain, Marion Leboyer, Bruno Etain, Frank Bellivier, Andreas J. Forstner, Markus Leber, Stefan Herms, Per Hoffmann, Anna Maaser, Sascha B. Fischer, Céline S. Reinbold, Sarah Kittel-Schneider, Jolanta Lissowska, Janice M. Fullerton, Joanna Hauser, Sarah E. Medland, Scott D. Gordon, Jens Treutlein, Josef Frank, Fabian Streit, José Guzman-Parra, Fermin Mayoral, Piotr M. Czerski, Neonila Szeszenia-Dabrowska, Bertram Müller-Myhsok, Markus Schwarz, Peter R. Schofield, Nicholas G. Martin, Grant W. Montgomery, Mark Lathrop, Bernhard T. Baune, Sven Cichon, Thomas W. Mühleisen, Franziska Degenhardt, Manuel Mattheisen, Johannes Schumacher, Wolfgang Maier, Markus M. Nöthen, Michael Bauer, Philip B. Mitchell, Andreas Reif, Tiffany A. Greenwood, Caroline M. Nievergelt, Paul D. Shilling, Nicholas J. Schork, Erin N. Smith, John I. Nurnberger, Howard J. Edenberg, Tatiana Foroud, Elliot S. Gershon, William B. Lawson, Evaristus A. Nwulia, Maria Hipolito, John Rice, William Byerley, Francis J. McMahon, Wade Berrettini, James B. Potash, Peter P. Zandi, Sebastian Zöllner, Peng Zhang, Gerome Breen, Lisa Jones, Peter A. Holmans, Ian R. Jones, George Kirov, Valentina Escott-Price, Ivan Nikolov, Michael C. O'Donovan, Michael J. Owen, Nick Craddock, I. Nicol Ferrier, Martin Alda, Pablo Cervantes, Cristiana Cruceanu, Guy A. Rouleau, Gustavo Turecki, Qingqin S. Li, Roel Ophoff, Rolf Adolfsson, Carlos Pato and Joanna M. Biernacka

Eating Disorder Working Group of the Psychiatric Genomics Consortium (Anorexia Nervosa)

Harry Brandt, Scott Crow, Manfred M. Fichter, Katherine A. Halmi, Maria La Via, James Mitchell, Michael Strober, Alessandro Rotondo, D. Blake Woodside, Pamela Keel, Lisa Lilienfeld, Andrew W. Bergen, Walter Kaye, Pierre Magistretti, Deborah Kaminska, Vesna Boraska Perica, Christopher S. Franklin, James A. B. Floyd, Laura M. Thornton, Laura M. Huckins, Lorraine Southam, N. William Rayner, Ioanna Tachmazidou, Kelly L. Klump, Janet Treasure, Cathryn M. Lewis, Ulrike Schmidt, Federica Tozzi, Kirsty Kiezebrink, Johannes Hebebrand, Philip Gorwood, Roger A. H. Adan, Martien J. H. Kas, Angela Favaro, Paolo Santonastaso, Fernando Fernández-Aranda, Monica Gratacos, Filip Rybakowski, Jaakko Kaprio, Anna Keski-Rahkonen, Anu Raevuori, Eric F. van Furth, Margarita C. T. Slof-Op 't Landt, James I. Hudson, Ted Reichborn-Kjennerud, Gun Peggy S. Knudsen, Palmiero Monteleone, Allan S. Kaplan, Andreas Karwautz, Hakon Hakonarson, Wade H. Berrettini, Yiran Guo, Dong Li, Nicholas J. Schork, Tetsuya Ando, Tõnu Esko, Krista Fischer, Katrin Mannik, Andres Metspalu, Jessica H. Baker, Roger D. Cone, Janiece E. DeSocio, Christopher E. Hilliard, Julie K. O'Toole, Jacques Pantel, Jin

Peng Szatkiewicz, Chrysecolla Taico, Stephanie Zerwas, Sara E. Trace, Oliver S. P. Davis, Sietske G. Helder, Roland Burghardt, Martina de Zwaan, Karin Egberts, Stefan Ehrlich, Beate Herpertz-Dahlmann, Wolfgang Herzog, Hartmut Imgart, André Scherag, Susann Scherag, Stephan Zipfel, Nicolas Ramoz, Unna N. Danner, Carolien de Kove, Judith Hendriks, Bobby P.C. Koeleman, Roel A. Ophoff, Annemarie A. van Elburg, Maurizio Clementi, Daniela Degortes, Monica Forzan, Elena Tenconi, Elisa Docampo, Susana Jimenez-Murcia, Jolanta Lissowska, Neonilia Szeszenia-Dabrowska, Joanna Hauser, Leila Karhunen, Ingrid Meulenbelt, P. Eline Slagboom, Steve Crawford, Alfonso Tortorella, Mario Maj, George Dedoussis, Fragiskos Gonidakis, Konstantinos Tziouvas, Artemis Tsitsika, Hana Papežová, Lenka Slachtova, Debora Martaskova, James L. Kennedy, Robert D. Levitan, Zeynep Yilmaz, Julia Huemer, Gudrun Wagner, Paul Lichtenstein, Gerome Breen, Sarah Cohen-Woods, Sven Cichon, Ina Giegling, Stefan Herms, Dan Rujescu, Stefan Schreiber, H-Erich Wichmann, Christian Dina, Giovanni Gambaro, Nicole Soranzo, Antonio Julià, Sara Marsal, Raquel Rabionet, Danielle M. Dick, Aarno Palotie, Samuli Ripatti, Ole A. Andreassen, Thomas Espeseth, Astri Lundervold, Ivar Reinvang, Vidar M. Steen, Stephanie Le Hellard, Morten Mattingsdal, Ioanna Ntalla, Vladimir Bencko, Lenka Foretova, Marie Navratilova, Dalila Pinto, Stephen W. Scherer, Harald Aschauer, Laura Carlberg, Alexandra Schosser, Lars Alfredsson, Bo Ding, Leonid Padyukov, Gursharan Kalsi, Marion Roberts, Darren W. Logan, Xavier Estivill, Anke Hinney, Patrick F. Sullivan, David A. Collier, Eleftheria Zeggini and Cynthia M. Bulik

Major Depressive Disorder Working Group of the Psychiatric Genomics Consortium (Major depressive disorder)

Patrick Sullivan, Stephan Ripke, Danielle Posthuma, André G. Uitterlinden, Albert Hofman, Stefan Kloiber, Klaus Berger, Bertram Müller-Myhsok, Qingqin Li, Till F.M. Andlauer, Marcella Rietschel, Andreas J. Forstner, Fabian Streit, Jana Strohmaier, Josef Frank, Stefan Herms, Stephanie Witt, Jens Treutlein, Markus M. Nöthen, Sven Cichon, Franziska Degenhardt, Per Hoffmann, Thomas G Schulze, Bernhard T. Baune, Udo Dannlowski, Tracy Air, Grant Sinnamon, Naomi R. Wray, Andrew McIntosh, Douglas Blackwood, Toni-Kim Clarke, Donald J. MacIntyre, David Porteous, Caroline Hayward, Tonu Esko, Evelin Mihailov, Lili Milani, Andres Metspalu, Hans J. Grabe, Henry Völzke, Alexander Teumer, Sandra van der Auwera, Georg Homuth, Matthias Nauck, Cathryn Lewis, Gerome Breen, Margarita Rivera, Michael Gill, Nick Craddock, John P. Rice, Michael Owen, Ole Mors, Anders D. Børghlum, Jakob Grove, Daniel Umbricht, Carsten Horn, Christel M. Middeldorp, Enda Byrne, Baptiste Couvy-Duchesne, Scott D. Gordon, Andrew C. Heath, Anjali Henders, Ian Hickie, Nicholas G. Martin, Sarah Medland, Grant W. Montgomery, Dale R. Nyholt, Michele Pergadia, Divya Mehta, Martin Preisig, Zoltán Kutalik, Rudolf Uher, Michael O'Donovan, Brenda WJH Penninx, Yuri Milanéschi, Wouter Peyrot, Johannes H. Smit, Rick Jansen, Aartjan TF Beekman, Robert A. Schoevers, Albert van Hemert, Gerard van Grootheest, Dorret Boomsma, Jouke- Jan Hottenga, Eco de Geus, Erin Dunn, Jordan W. Smoller, Patrik Magnusson, Nancy Pedersen, Alexander Viktorin, Thomas Werge, Thomas Folkmann Hansen, Sara Paciga, Hualin Xi, Douglas Levinson, James Potash and James A Knowles

Tourette Syndrome and Obsessive-Compulsive Disorder Working Group of the Psychiatric Genomics Consortium (Tourette Syndrome and Obsessive-compulsive disorder)

John Alexander, Paul Arnold, Harald Aschauer, Cristina Barlassina, Cathy L. Barr, Robert Batterson, Laura Bellodi, Cheston Berlin, Gabriel Bedoya-Berrio, O. Joseph Bienvenu, Donald Black, Michael Bloch, Rianne Blom, Helena Brentani, Lawrence W. Brown, Ruth Bruun, Cathy Budman, Christie Burton, Beatriz Camarena, Carolina Cappi, Julio Cardona-Silgado, Danielle Cath, Maria Cavallini, Keun-Ah Cheon, Barbara J. Coffey, David Conti, Edwin Cook, Nancy Cox, Bernadette Cullen, Daniele Cusi, Sabrina Darrow, Lea Davis, Dieter Deforce, Richard Delorme, Damiaan Denys, Christel Depienne, Eske M. Derks, Andrea Dietrich, Yves Dion, Shan Dong, Valsamma Eapen, Valsama Eapen, Karin Egberts, Lonneke Elzerman, Patrick Evans, Peter Falkai, Thomas V. Fernandez, Martijn Figee, Nelson Freimer, Odette Fründt, Abby Fyer, Blanca Garcia-Delgar, Helena Garrido, Daniel Geller, Gloria Gerber, Donald L. Gilbert, Fernando S. Goes, Hans-Jorgen Grabe, Marco Grados, Erica Greenberg, Benjamin Greenberg, Dorothy E. Grice, Edna Grünblatt, Julie Hagstrøm, Gregory L. Hanna, Andreas Hartmann, Johannes Hebebrand, Tammy Hedderly, Gary A. Heiman, Sian Hemmings, Luis Herrera, Peter Heutink, Isobel Heyman, Matthew E. Hirschtritt, Pieter J. Hoekstra, Hyun Ju Hong, Ana Hounie, Alden Huang, Chaim Huyser, Laura Ibanez-Gomez, Cornelia Illmann, Michael Jenike, Clare Keenan, James L. Kennedy, Judith Kidd, Kenneth Kidd, Young Key Kim, Young-Shin Kim, Robert A. King, James A. Knowles, Anuar Konkashbaev, Anastasios Konstantinidis, Sodahm Kook, Samuel Kuperman, Nuria Lanzagorta, Marion Leboyer, James Leckman, Phil H. Lee, Leonhard Lennertz, Bennett L. Leventhal, Christine Lochner, Thomas Lowe, Andrea G. Ludolph, Gholson J. Lyon, Fabio Macciardi, Marcos Madruga-Garrido, Brion Maher, Wolfgang Maier, Irene A. Malaty, Paolo Manunta, Athanasios Maras, Carol A. Mathews, Manuel Mattheisen, James McCracken, Lauren McGrath, Nicole McLaughlin, William McMahon, Sandra Mesa Restrepo, Eurípedes C. Miguel, Pablo Mir, Rainald Moessner, Astrid Morer, Kirsten Müller-Vahl, Alexander Münchau, Tara L. Murphy, Dennis Murphy, Benjamin Neale, Gerald Nestadt, Paul S. Nestadt, Humberto Nicolini, Markus M. Nöthen, Erika Nurmi, William Cornejo-Ochoa, Michael S. Okun, Lisa Osiecki, Andrew Pakstis, Peristera Paschou, Michele Pato, Carlos Pato, David Pauls, John Piacentini, Christopher Pittenger, Kerstin J. Plessen, Yehuda Pollak, Danielle Posthuma, Vasily Ramensky, Eliana Mariana Ramos, Steven Rasmussen, Tobias Renner, Victor Reus, Margaret A. Richter, Mark A. Riddle, Renata Rizzo, Mary M. Robertson, Veit Roessner, Maria Rosário, David Rosenberg, Guy Rouleau, Stephan Ruhrmann, Andres Ruiz-Linares, Aline Sampaio, Jack F. Samuels, Paul Sandor, Jeremiah Scharf, Eun-Young Shin, Yin Shugart, Harvey Singer, Jan Smit, Jordan Smoller, Jungeun Song, Dan J. Stein, S. Evelyn Stewart, Nawei Sun, Jay A. Tischfield, Fotis Tsetsos, Jennifer Tübing, Maurizio Turiel, Ana Valencia Duarte, Homero Vallada, Filip Van Nieuwerburgh, Frank Visscher, Nienke Vulink, Michael Wagner, Susanne Walitza, Sina Wanderer, Ying Wang, Sarah Weatherall, Jens R. Wendland, Tomasz Wolanczyk, Martin Woods, Yulia Worbe, Jinchuan Xing, Dongmei Yu, Gwyneth Zai, Ivette Zelaya, Yeting Zhang and Samuel H. Zinner

Schizophrenia Working Group of the Psychiatric Genomics Consortium  
(Schizophrenia)  
Rolf Adolfsson, Ingrid Agartz, Ole Andreassen, Martin Begemann, Sarah Bergen, Donald Black, Douglas Blackwood, Anders Børglum, Elvira Bramon, Richard Bruggeman, Nancy Buccola, Brendan Bulik-Sullivan, Joseph Buxbaum, William Byerley, Wiepke Cahn, Murray Cairns, Dominique Campion, Rita Cantor, Vaughan Carr, Raymond Chan, Ronald Chen, Wei Cheng, Eric Cheung, Siow A. Chong, Sven Cichon, Robert Cloninger, David Cohen, David Collier, Paul Cormican, Aiden Corvin, Nick Craddock, Benedicto Crespo-Facorro, James Crowley, David Curtis, Mark Daly, Michael Davidson, Franziska Degenhardt, Jurgen Del Favero, Lynn DeLisi, Ditte Demontis, Timothy Dinan, Srdjan Djurovic, Enrico Domenici, Gary Donohoe, Elodie Drapeau, Jubao Duan, Hannelore Ehrenreich, Johan Eriksson, Valentina Escott-Price, Tõnu Esko, Ayman Fanous, Kai-How Farh, Josef Frank, Lude Franke, Robert Freedman, Nelson Freimer, Joseph Friedman, Menachem Fromer, Pablo V. Gejman, Elliot Gershon, Ina Giegling, Michael Gill, Paola Giusti-Rodríguez, Stephanie Godard, Lieuwe Haan, Christian Hammer, Marian Hamshere, Thomas Hansen, Vahram Haroutunian, Annette Hartmann, Frans Henskens, Stefan Herms, Per Hoffmann, Andrea Hofman, Peter Holmans, David Hougaard, Hailiang Huang, Christina Hultman, Assen Jablensky, Inge Joa, Erik Jönsson, Antonio Julià, René Kahn, Luba Kalaydjieva, Sena Karachanak-Yankova, Brian Kelly, Kenneth S. Kendler, James Kennedy, Andrey Khrunin, George Kirov, Janis Klovins, Jo Knight, James A. Knowles, Bettina Konte, Vaidutis Kučinskas, Claudine Laurent, Phil H. Lee, Hong Lee, Jimmy Lee Chee Keong, Bernard Lerer, Douglas Levinson, Miaoxin Li, Tao Li, Qingqin Li, Svetlana Limborska, Jianjun Liu, Carmel Loughland, Jouko Lönngqvist, Milan Macek, Patrik Magnusson, Brion Maher, Wolfgang Maier, Sara Marsal, Manuel Mattheisen, Morten Mattingsdal, Colm McDonald, Andrew McIntosh, Andrew McQuillin, Sandra Meier, Ingrid Melle, Andres Metspalu, Lili Milani, Derek Morris, Ole Mors, Preben Mortensen, Bryan Mowry, Bertram Müller-Myhsok, Kieran C. Murphy, Robin Murray, Benjamin Neale, Igor Nenadic, Gerald Nestadt, Annelie Nordin, Markus M. Nöthen, Eadbhard O'Callaghan, Michael O'Donovan, Sang-Yun Oh, Roel Ophoff, Jim van Os, Michael Owen, Aarno Palotie, Christos Pantelis, Sergi Papiol, Michele Pato, Carlos Pato, Psychosis Endophenotypes International Consortium, Tracey Petryshen, Jonathan Pimm, Danielle Posthuma, Alkes Price, Shaun Purcell, Digby Quested, Abraham Reichenberg, Alexander Richards, Marcella Rietschel, Brien Riley, Stephan Ripke, Joshua Roffman, Panos Roussos, Douglas Ruderfer, Dan Rujescu, Veikko Salomaa, Alan R. Sanders, Ulrich Schall, Sibylle G. Schwab, Rodney Scott, Pak Sham, Jeremy Silverman, Kang Sim, Pamela Sklar, Jordan W. Smoller, Hon-Cheong So, David Clair, Eli Stahl, Elisabeth Stögmänn, Jana Strohmaier, Scott Stroup, Mythily Subramaniam, Patrick Sullivan, Jaana Suvisaari, Jin Szatkiewicz, Srinivas Thirumalai, Draga Toncheva, Sarah Tosato, John Waddington, James Walters, Dai Wang, Qiang Wang, Bradley Webb, Mark Weiser, Thomas Werge, Dieter Wildenauer, Nigel Williams, Stephanie Witt, Emily Wong, Naomi R. Wray, Wellcome Trust Case-Control Consortium 2, Hualin Xi, Clement Zai and Fritz Zimprich

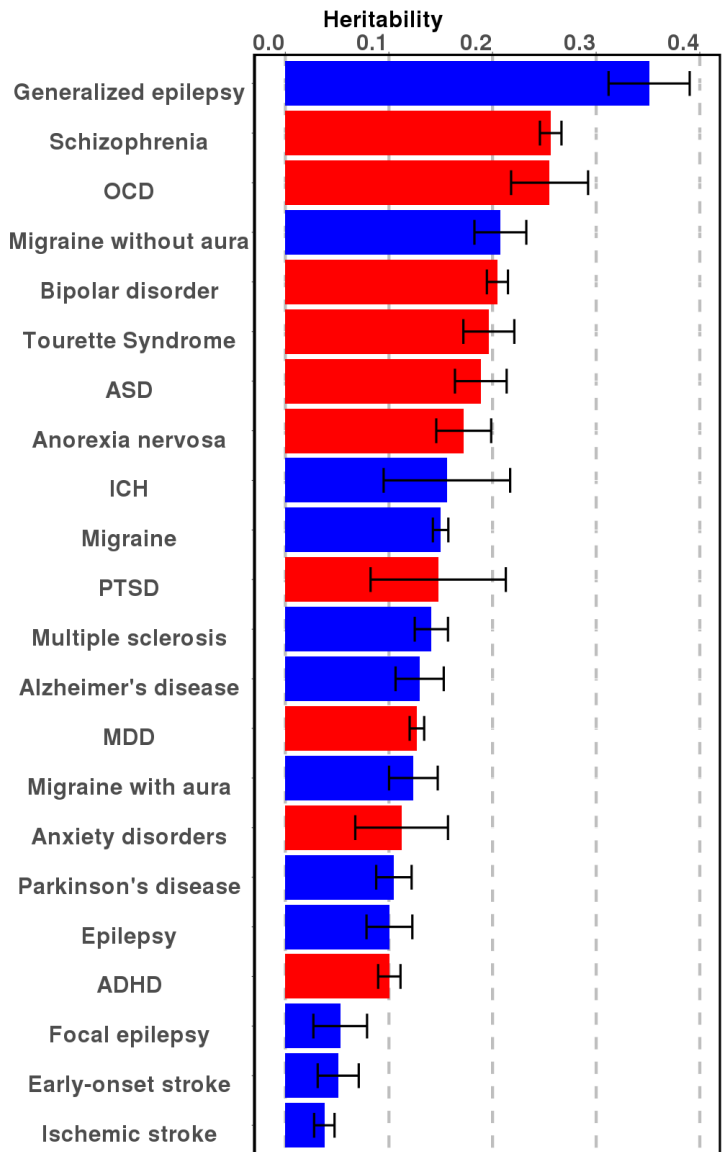

**Fig. S1A. Heritability estimates for brain disorders**

Red bars denote psychiatric disorders, while blue bars denote neurological disorders. ADHD – attention deficit hyperactivity disorder; ASD – autism spectrum disorder; ICH – intracerebral hemorrhage; MDD – major depressive disorder; OCD – obsessive-compulsive disorder; PTSD – post-traumatic stress disorder. Error bars show one standard error.

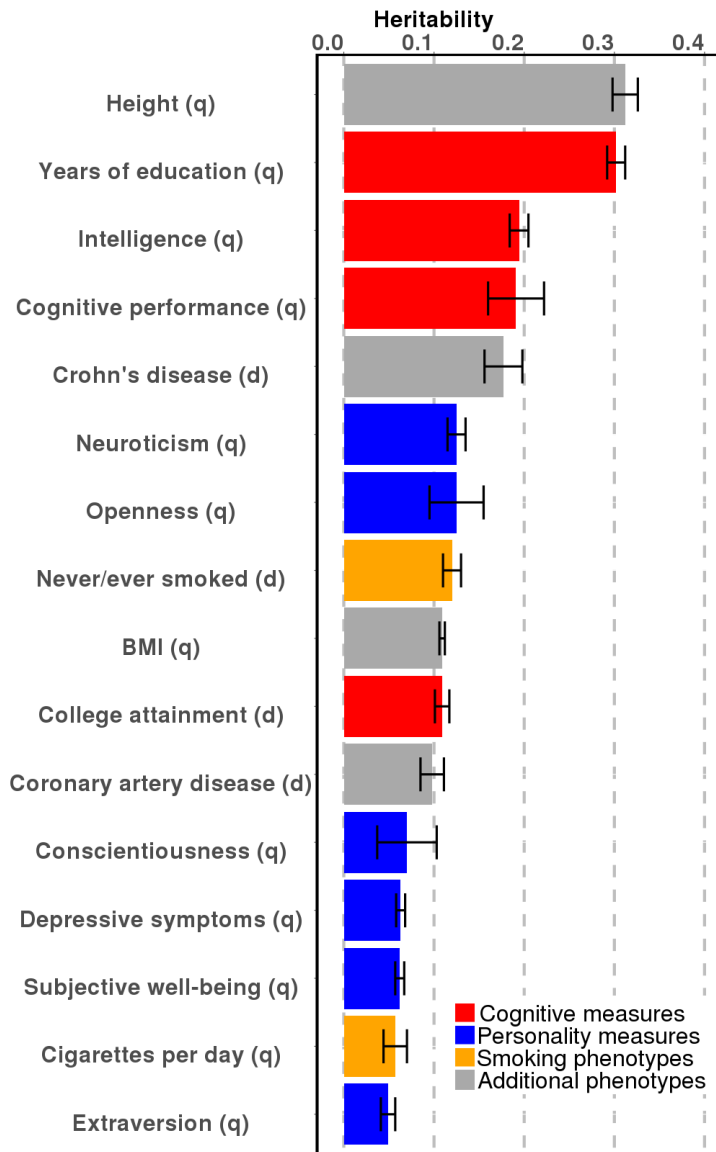

**Fig. S1B. Heritability estimates for quantitative and additional phenotypes**

BMI – body-mass index. Heritabilities are reported on the observed scale for quantitative phenotypes (q) and liability scale for dichotomous phenotypes (d). Error bars show one standard error.

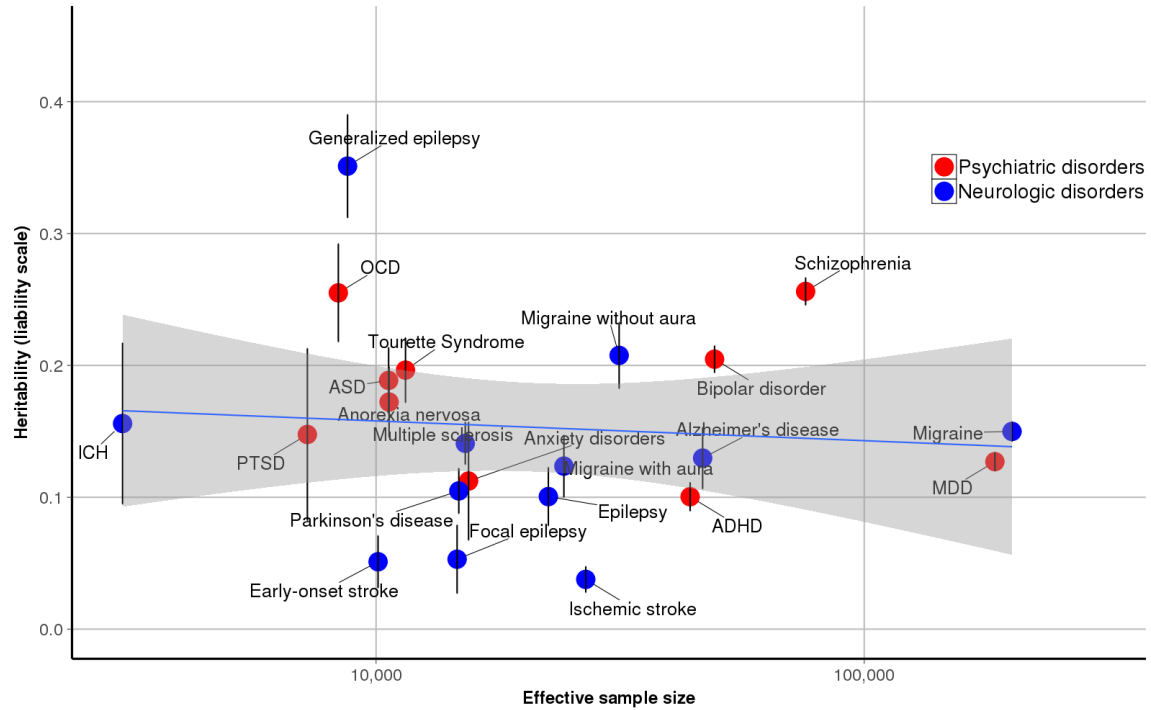

**Fig. S1C. Heritability and effective sample size**

ADHD – attention deficit hyperactivity disorder; ASD – autism spectrum disorder; ICH – intracerebral hemorrhage; MDD – major depressive disorder; OCD – obsessive-compulsive disorder; PTSD – post-traumatic stress disorder. Shaded area shows 95% confidence interval. Error bars show one standard error.



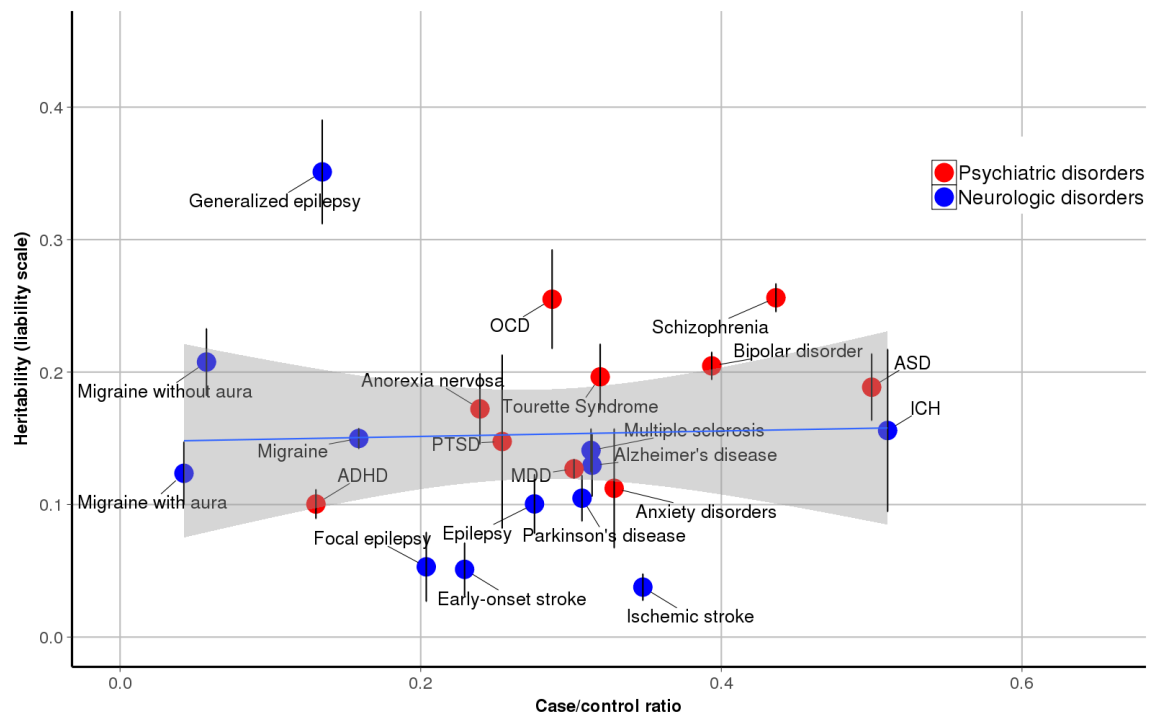

**Fig. S1D. Heritability and case/control ratio**

ADHD – attention deficit hyperactivity disorder; ASD – autism spectrum disorder; ICH – intracerebral hemorrhage; MDD – major depressive disorder; OCD – obsessive-compulsive disorder; PTSD – post-traumatic stress disorder. Shaded area shows 95% confidence interval. Error bars show one standard error.

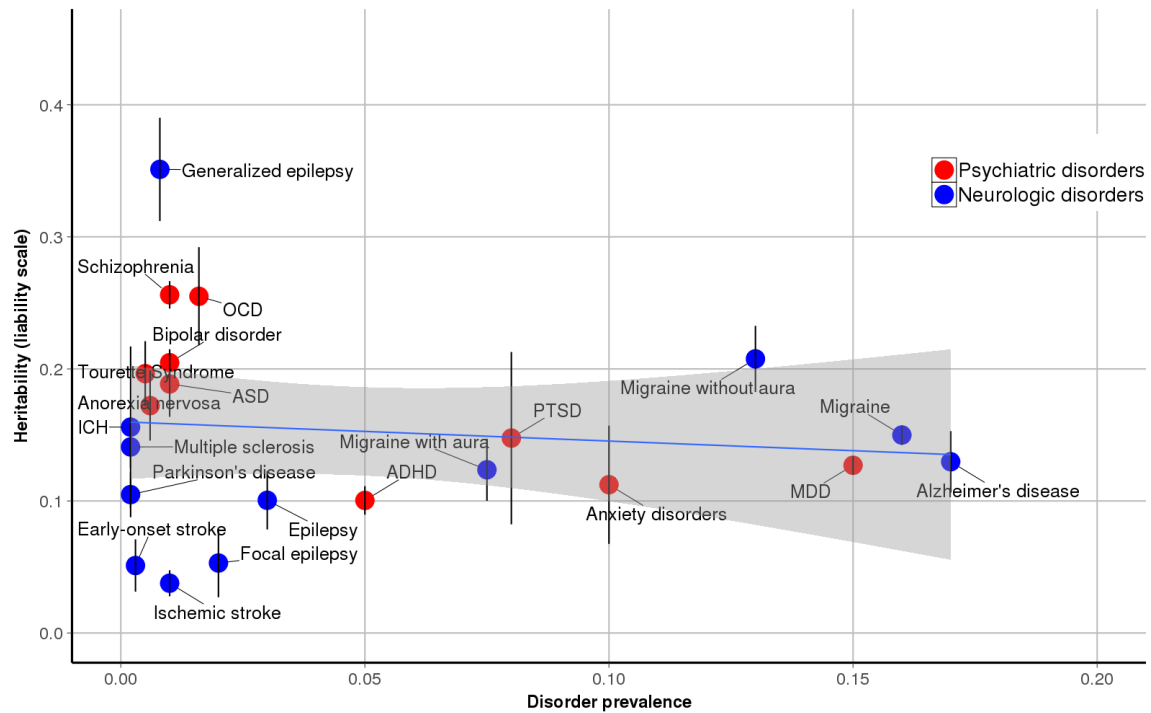

**Fig. S1E. Heritability and disorder prevalence**

ADHD – attention deficit hyperactivity disorder; ASD – autism spectrum disorder; ICH – intracerebral hemorrhage; MDD – major depressive disorder; OCD – obsessive-compulsive disorder; PTSD – post-traumatic stress disorder. Shaded area shows 95% confidence interval. Error bars show one standard error.

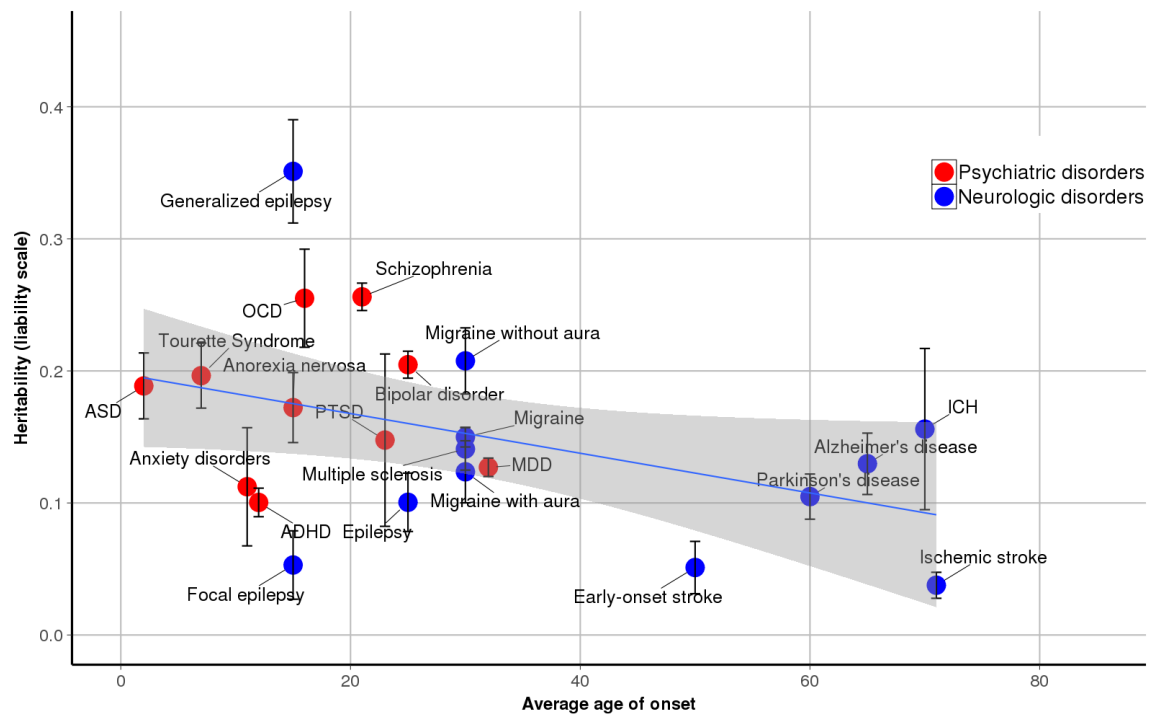

**Fig. S1F. Heritability and average age of onset for the disorder.**

ADHD – attention deficit hyperactivity disorder; ASD – autism spectrum disorder; ICH – intracerebral hemorrhage; MDD – major depressive disorder; OCD – obsessive-compulsive disorder; PTSD – post-traumatic stress disorder. Shaded area shows 95% confidence interval. Error bars show one standard error.

**Fig. S2A. Genetic correlations against power to detect heritability**

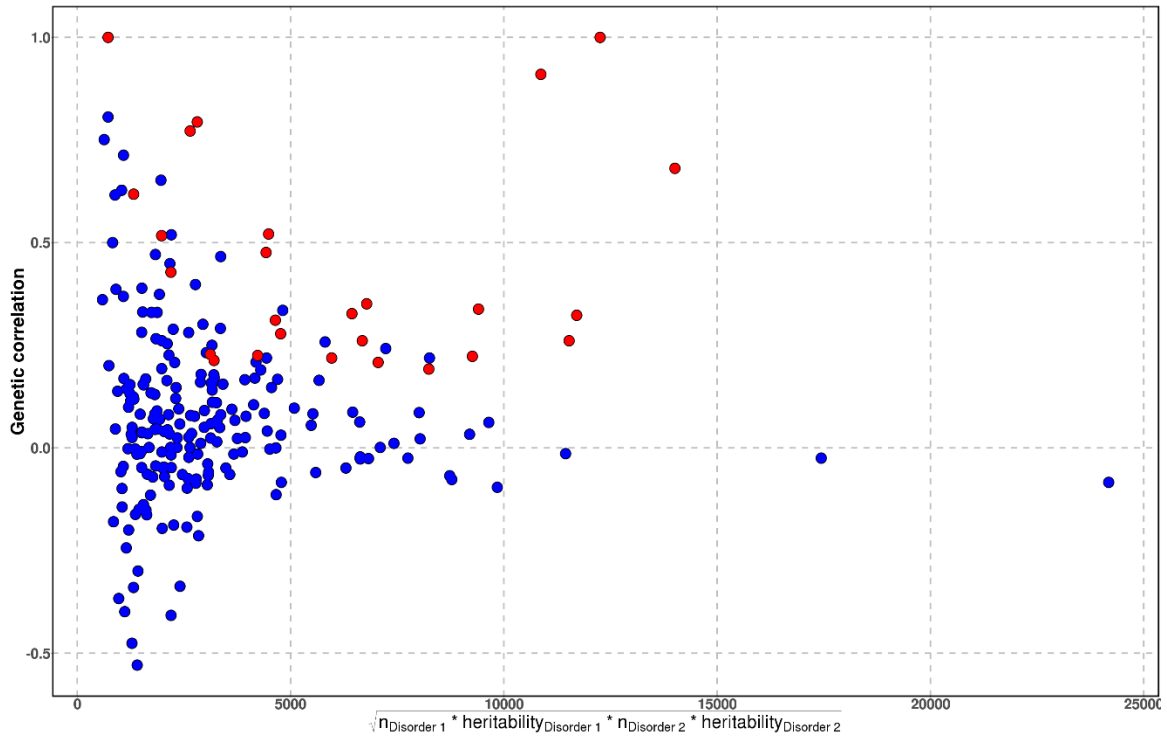

Red points show significant correlations among all disorder-disorder pairs. Two outlier values over 1 (see Table S7A) have been reduced to 1. The points close or equal to  $r_g = 1$  are pairs of a top-level disorder with a subtype of the same disorder, where high correlation is expected, ie. all migraine and migraine with aura.

**Fig. S2B. Inverses of standard errors against power to detect heritability**

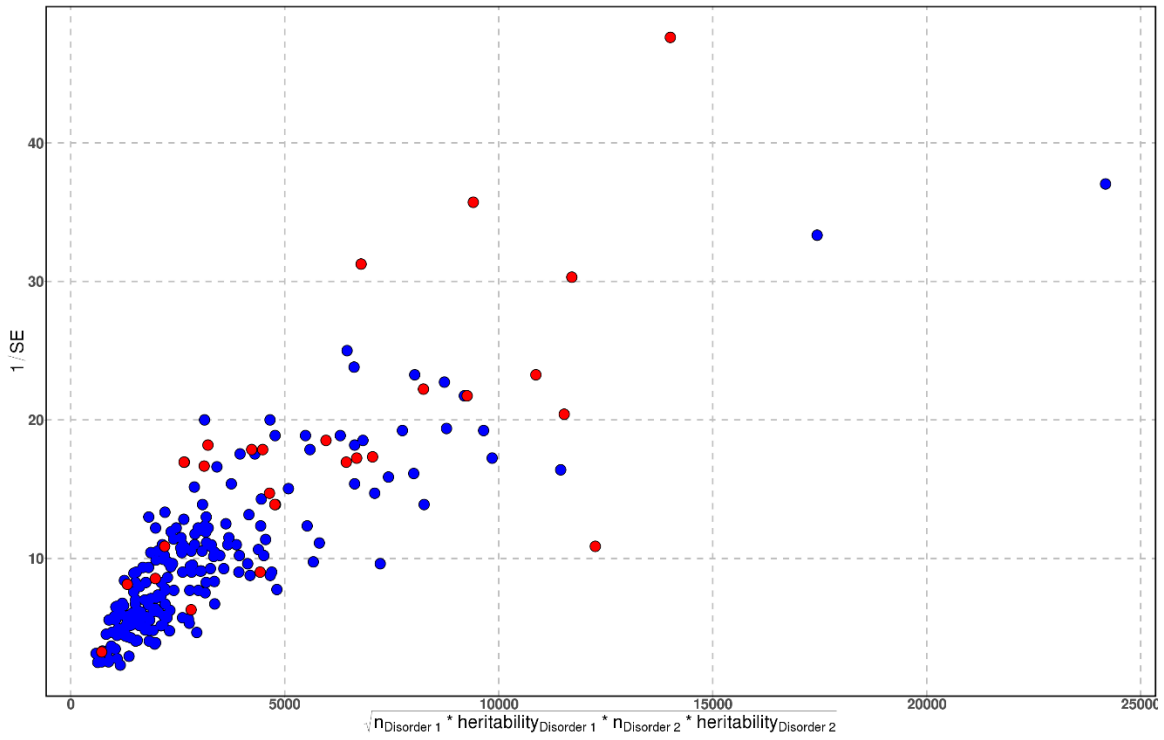

Red points show significant correlations among all disorder-disorder pairs. SE – standard error.

**Fig. S2C. Matrix of standard errors for the genetic correlations for disorder-disorder pairs.**

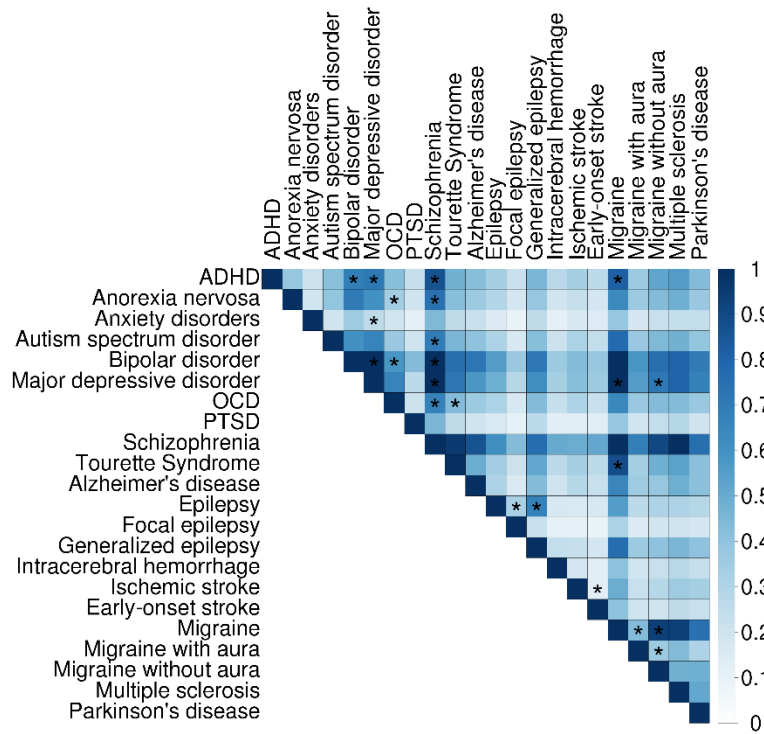

Plotted values indicate  $1/\text{standard error} * 1/25$  (1/25 chosen for scaling convenience); darker shades indicate tests with more power. Six outlier values over 1 (see Table S7A) have been reduced to 1. Asterisks highlight results which are significant after Bonferroni correction. ADHD - attention deficit hyperactivity disorder; OCD – obsessive-compulsive disorder; PTSD – post-traumatic stress disorder.

**Fig. S2D. Matrix of standard errors for the genetic correlations for disorder-phenotype pairs.**

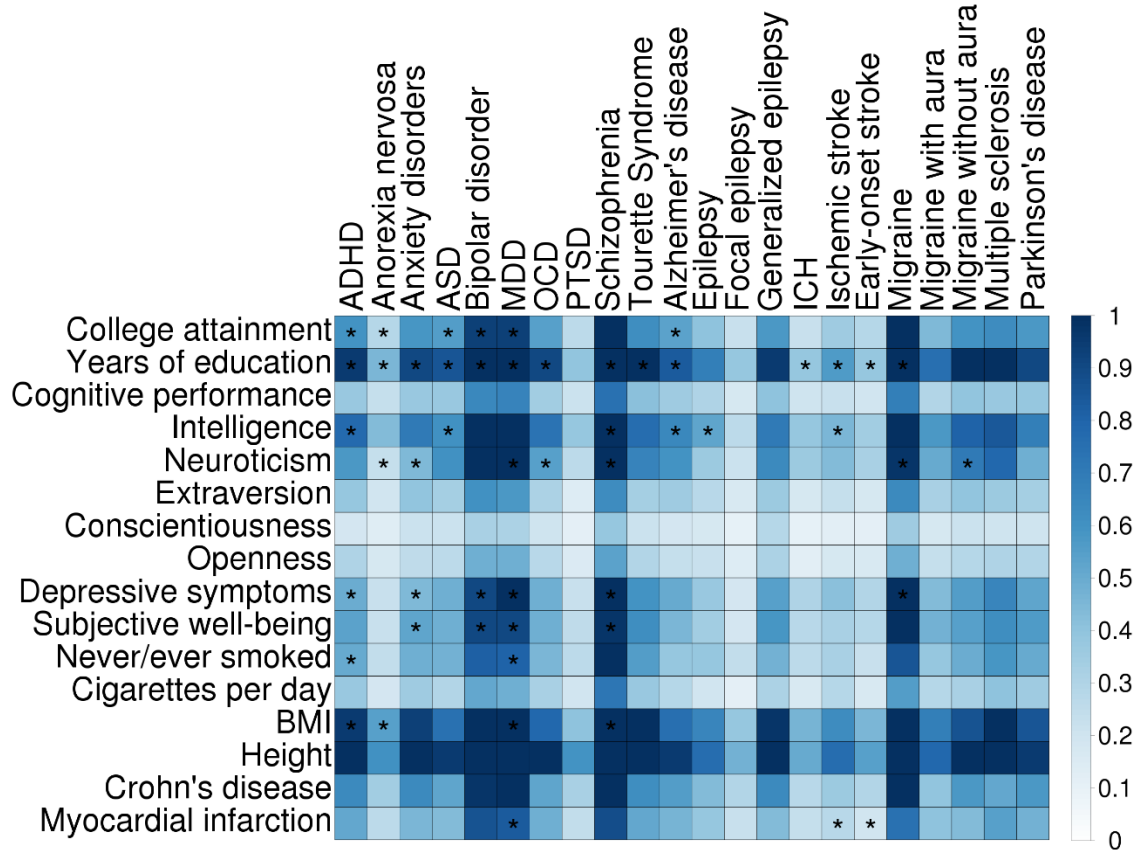

Plotted values indicate  $1/\text{standard error} * 1/25$  (1/25 chosen for scaling convenience); darker shades indicate tests with more power. 39 outlier values over 1 (see Table S7B) have been reduced to 1. Asterisks highlight results which are significant after Bonferroni correction. ADHD - attention deficit hyperactivity disorder; ASD – autism spectrum disorder; BMI – body-mass index; ICH – intracerebral hemorrhage; MDD – major depressive disorder; OCD – obsessive-compulsive disorder; PTSD – post-traumatic stress disorder.

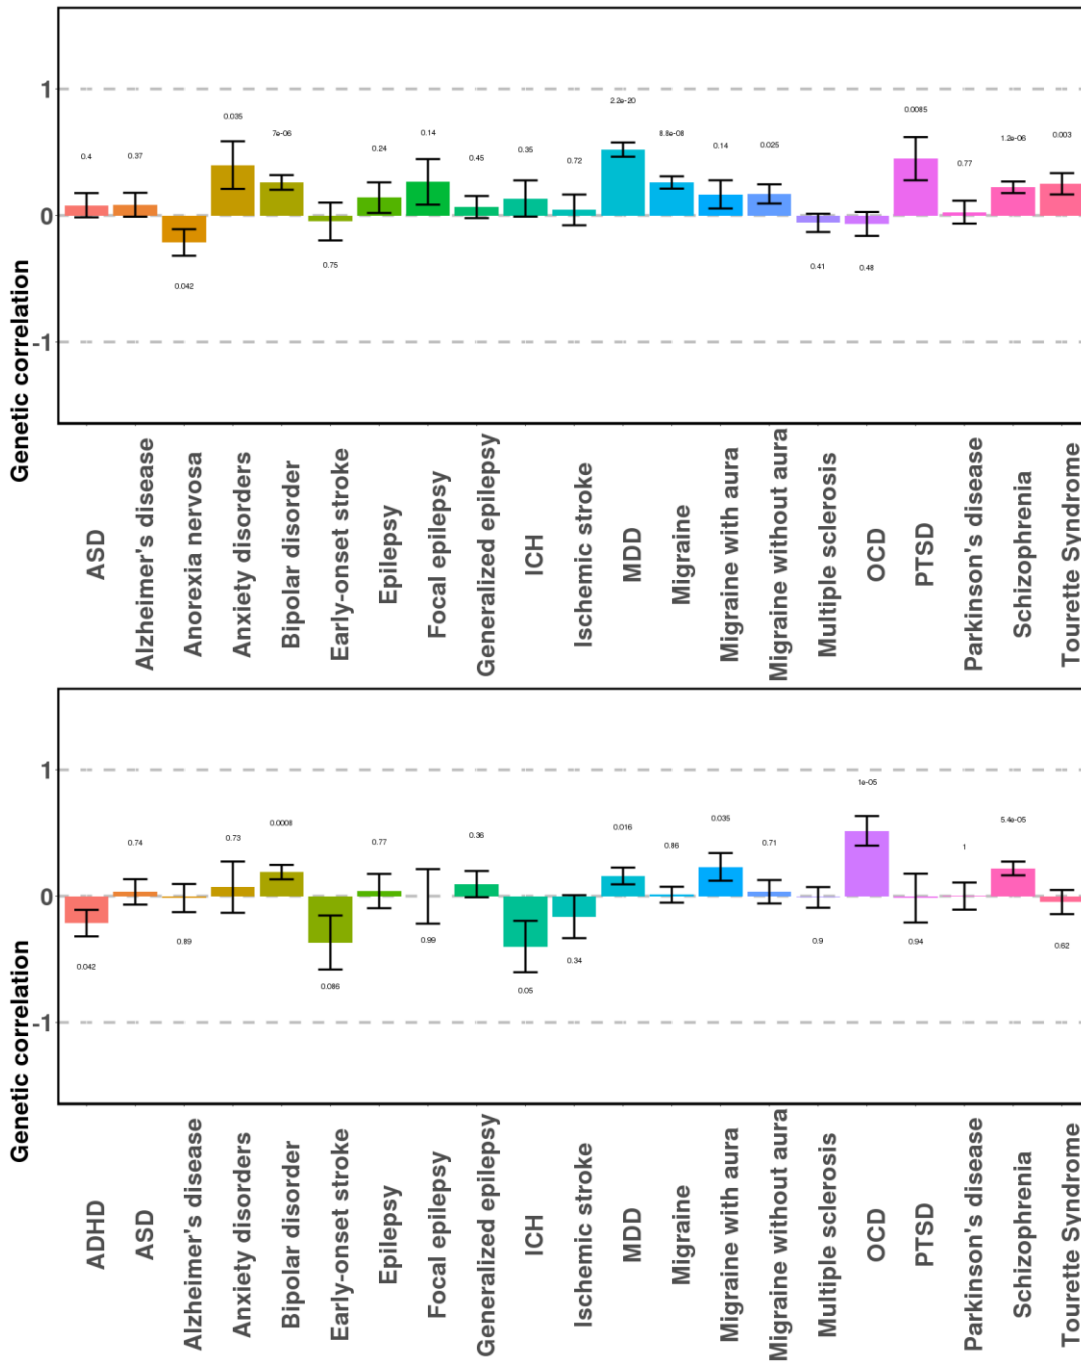

**Fig. S3A and B. Genetic correlations for attention-deficit hyperactivity disorder (top) and anorexia nervosa (bottom).**

ADHD - attention deficit hyperactivity disorder; ASD – autism spectrum disorder; ICH – intracerebral hemorrhage; MDD – major depressive disorder; OCD – obsessive-compulsive disorder; PTSD – post-traumatic stress disorder. P-values for correlation are shown at the end of each bar. Error bars show one standard error.



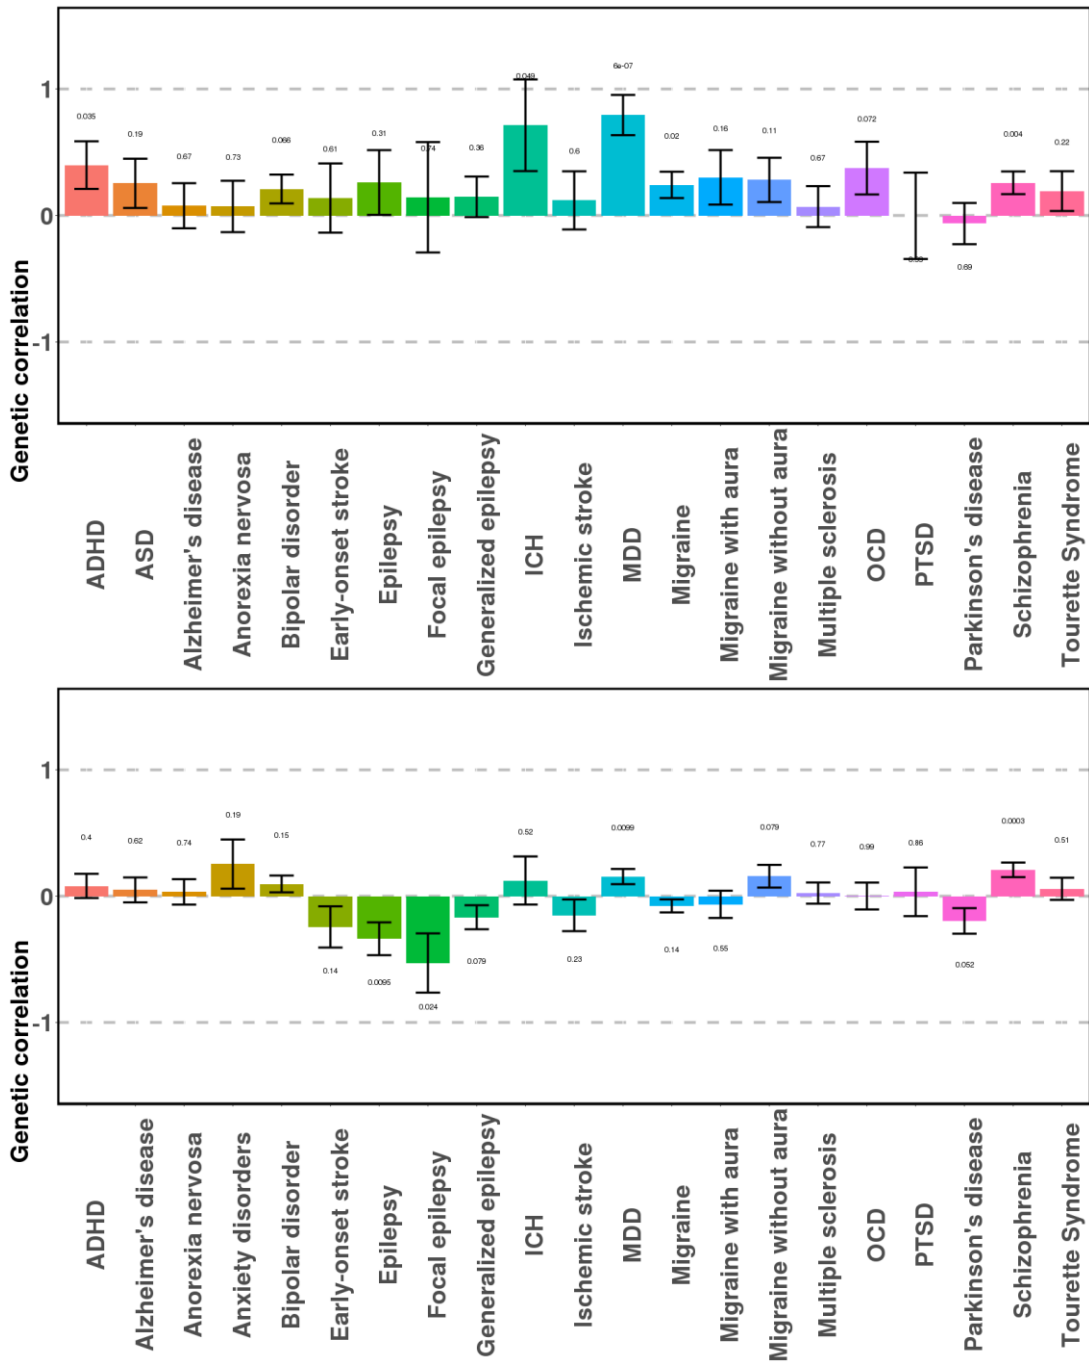

**Fig. S3C and D. Genetic correlations for anxiety disorders (top) and autism spectrum disorder (bottom).**

ADHD - attention deficit hyperactivity disorder; ASD – autism spectrum disorder; ICH – intracerebral hemorrhage; MDD – major depressive disorder; OCD – obsessive-compulsive disorder; PTSD – post-traumatic stress disorder. P-values for correlation are shown at the end of each bar. Error bars show one standard error.

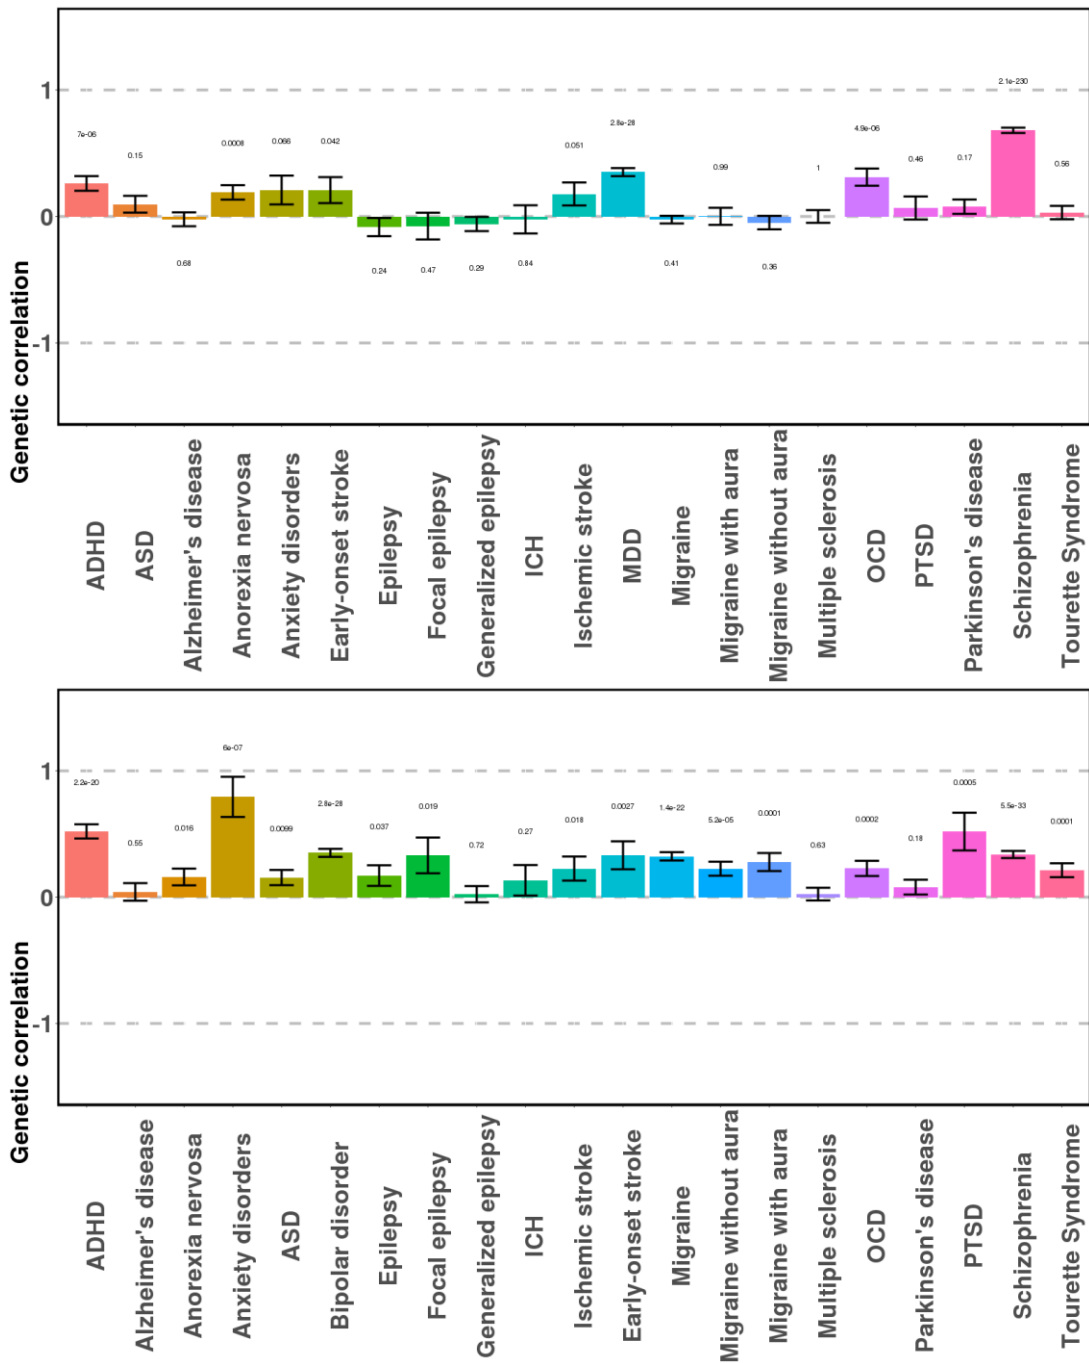

**Fig. S3E and F. Genetic correlations for bipolar disorder (top) and major depressive disorder (bottom).**

ADHD - attention deficit hyperactivity disorder; ASD – autism spectrum disorder; ICH – intracerebral hemorrhage; MDD – major depressive disorder; OCD – obsessive-compulsive disorder; PTSD – post-traumatic stress disorder. P-values for correlation are shown at the end of each bar. Error bars show one standard error.

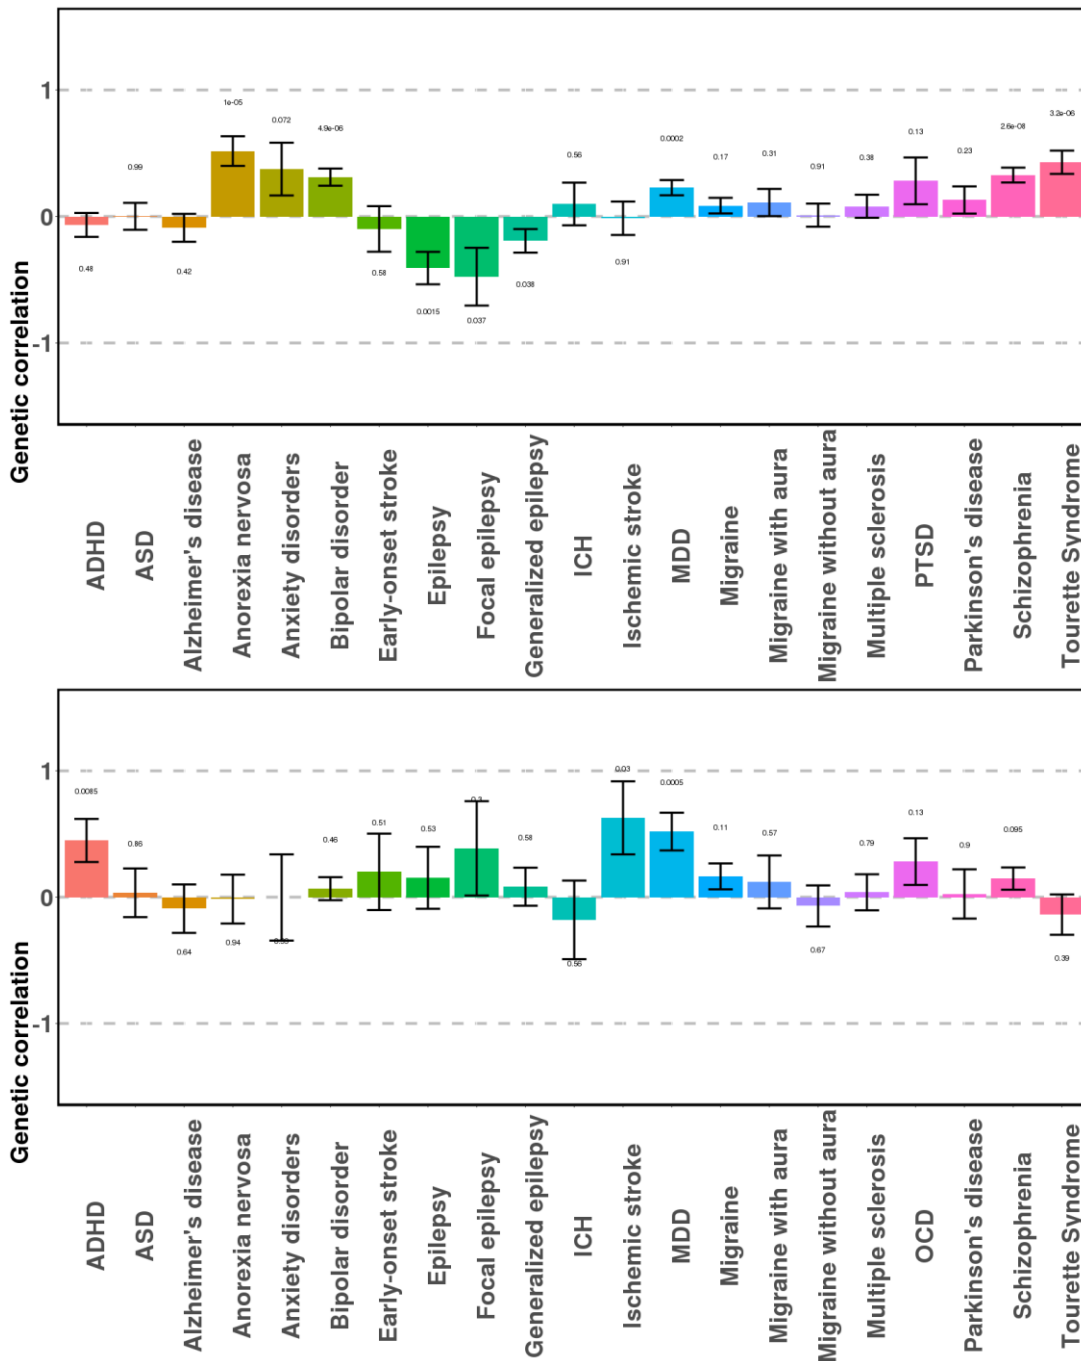

**Fig. S3G and H. Genetic correlations for obsessive-compulsive disorder (top) and post-traumatic stress disorder (bottom).**

ADHD - attention deficit hyperactivity disorder; ASD – autism spectrum disorder; ICH – intracerebral hemorrhage; MDD – major depressive disorder; OCD – obsessive-compulsive disorder; PTSD – post-traumatic stress disorder. P-values for correlation are shown at the end of each bar. Error bars show one standard error.

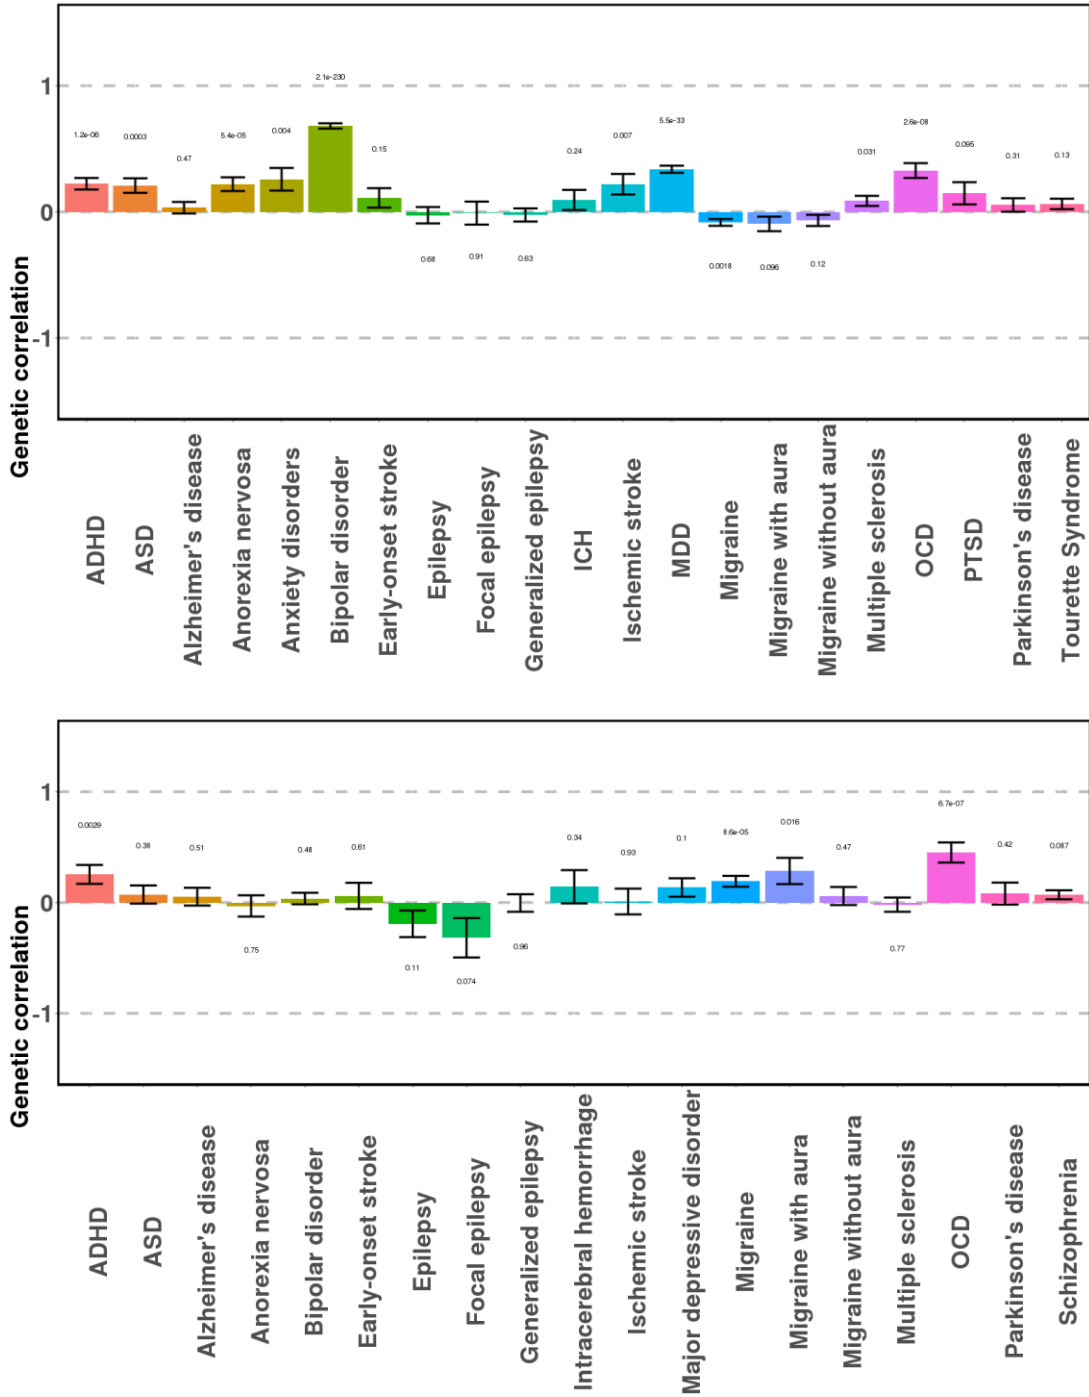

**Fig. S3I and J. Genetic correlations for schizophrenia (top) and Tourette Syndrome (bottom).**

ADHD - attention deficit hyperactivity disorder; ASD – autism spectrum disorder; ICH – intracerebral hemorrhage; MDD – major depressive disorder; OCD – obsessive-compulsive disorder; PTSD – post-traumatic stress disorder. P-values for correlation are shown at the end of each bar. Error bars show one standard error.

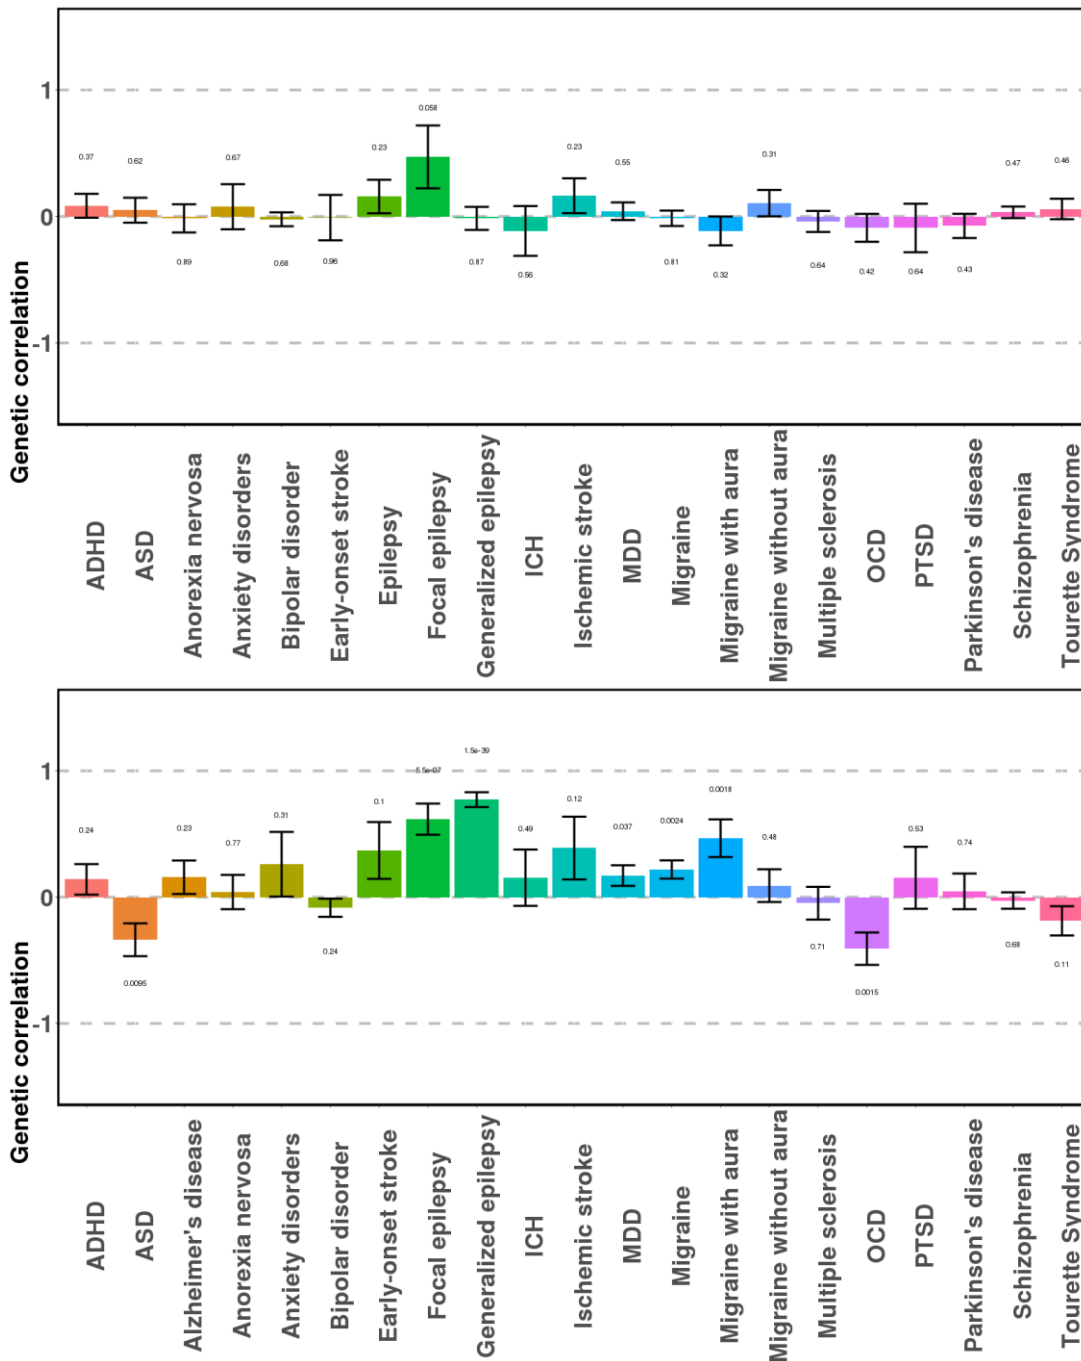

**Fig. S4A and B. Genetic correlations for Alzheimer's disease (top) and epilepsy (bottom).**

ADHD - attention deficit hyperactivity disorder; ASD – autism spectrum disorder; ICH – intracerebral hemorrhage; MDD – major depressive disorder; OCD – obsessive-compulsive disorder; PTSD – post-traumatic stress disorder. P-values for correlation are shown at the end of each bar. Error bars show one standard error.

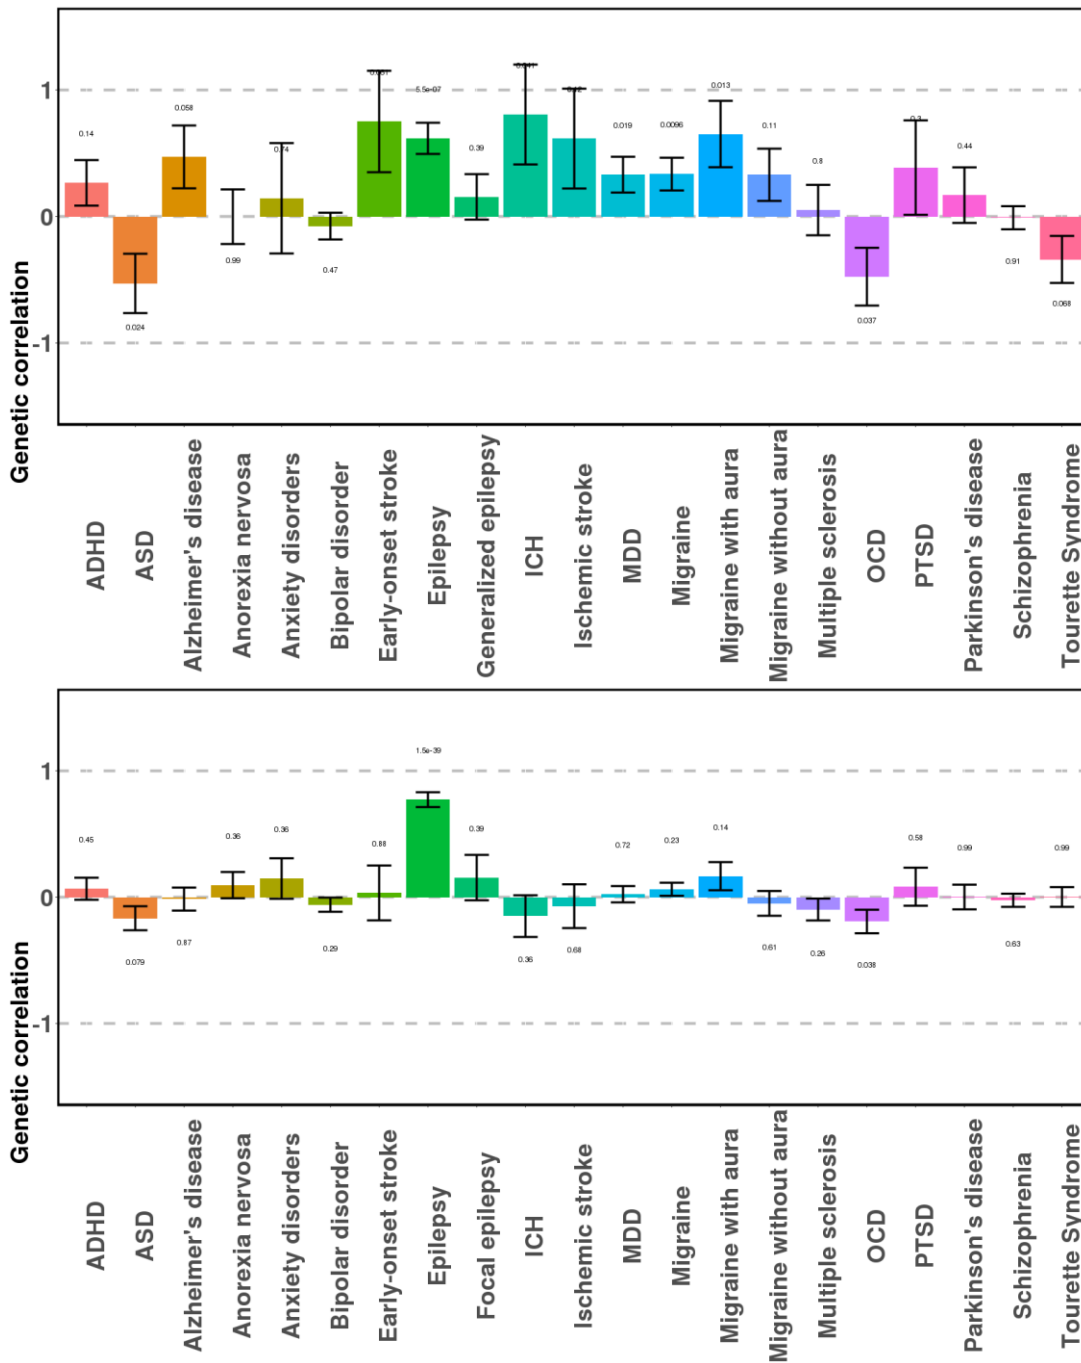

**Fig. S4C and D. Genetic correlations for focal epilepsy (top) and generalized epilepsy (bottom).**

ADHD - attention deficit hyperactivity disorder; ASD – autism spectrum disorder; ICH – intracerebral hemorrhage; MDD – major depressive disorder; OCD – obsessive-compulsive disorder; PTSD – post-traumatic stress disorder. P-values for correlation are shown at the end of each bar. Error bars show one standard error.

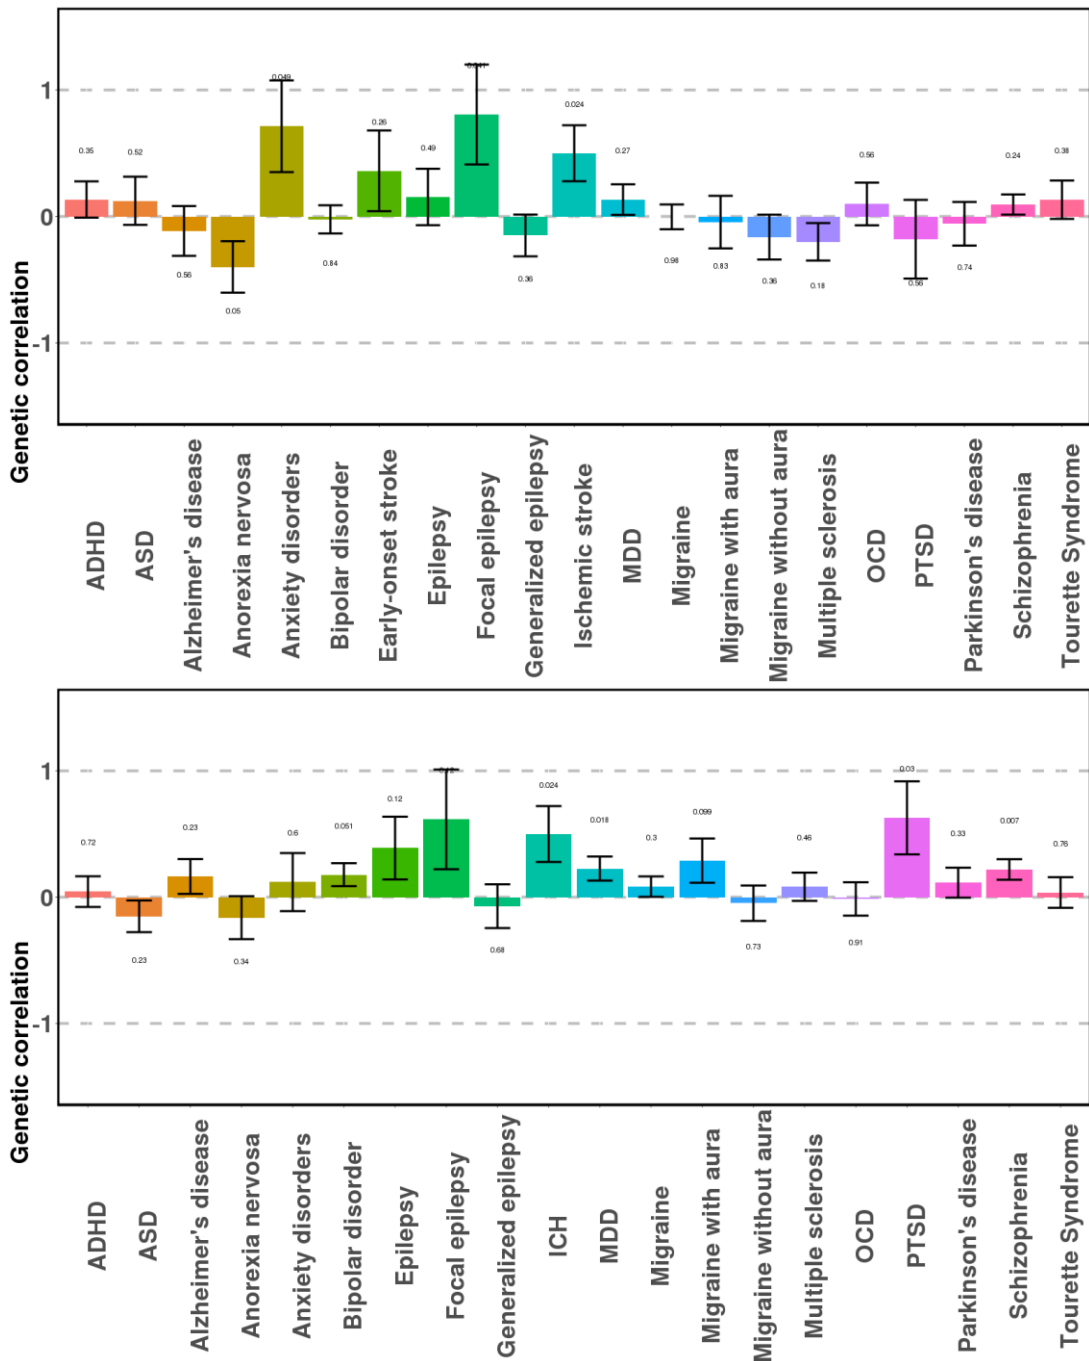

**Fig. S4E and F. Genetic correlations for intracerebral hemorrhage (top) and ischemic stroke (bottom).**

ADHD - attention deficit hyperactivity disorder; ASD – autism spectrum disorder; ICH – intracerebral hemorrhage; MDD – major depressive disorder; OCD – obsessive-compulsive disorder; PTSD – post-traumatic stress disorder. P-values for correlation are shown at the end of each bar. Error bars show one standard error.

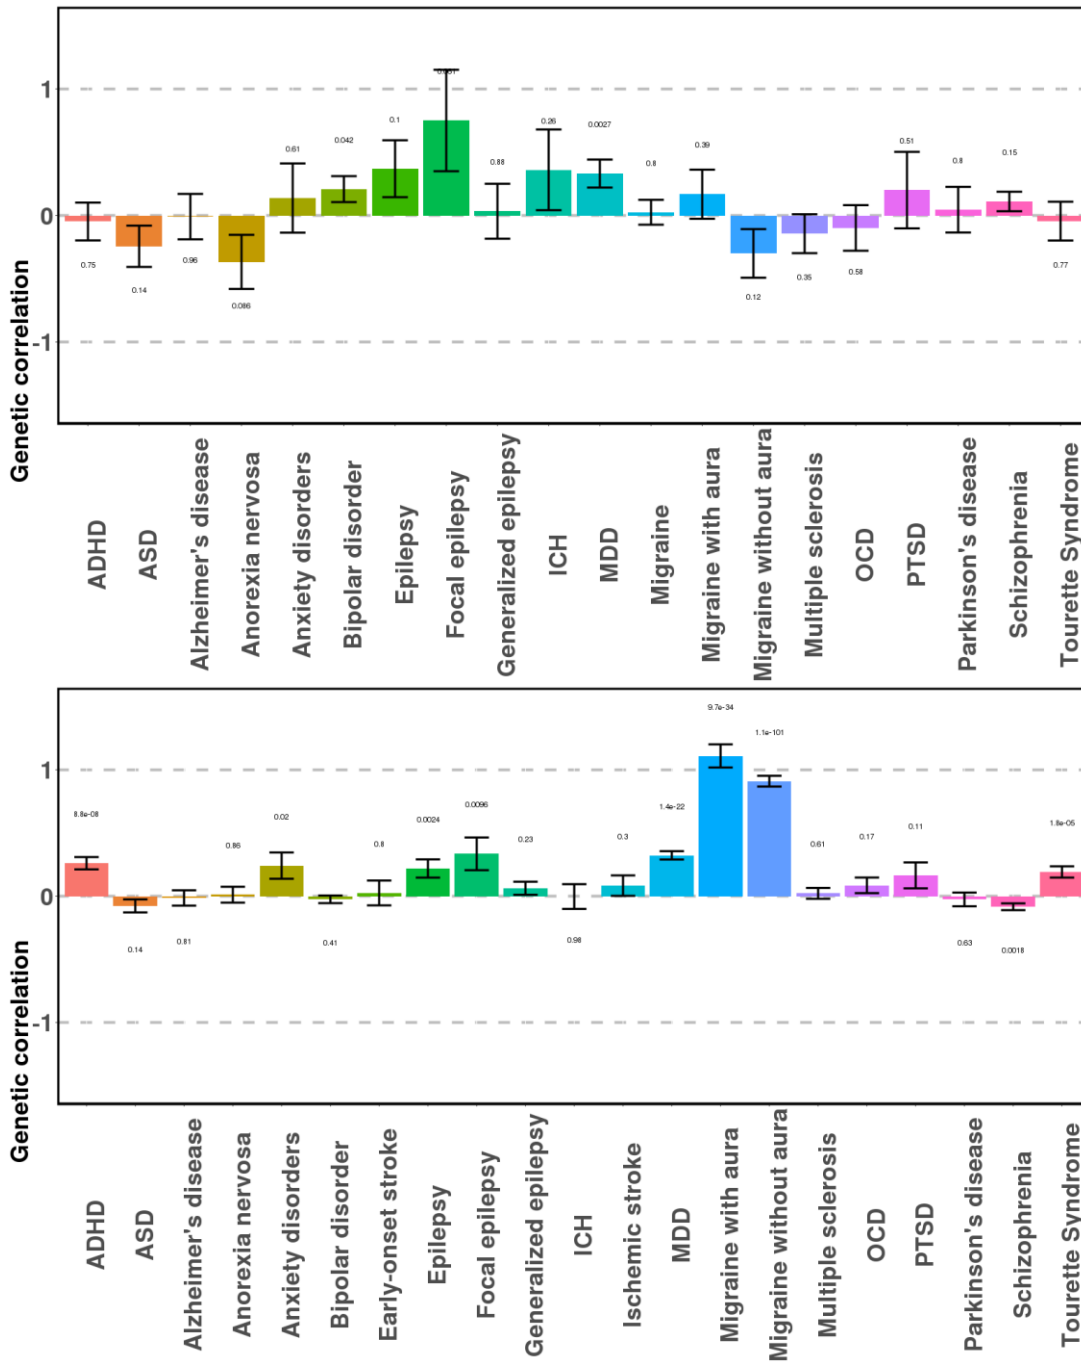

**Fig. S4G and H. Genetic correlations for early-onset stroke (top) and migraine (bottom).**

ADHD - attention deficit hyperactivity disorder; ASD – autism spectrum disorder; ICH – intracerebral hemorrhage; MDD – major depressive disorder; OCD – obsessive-compulsive disorder; PTSD – post-traumatic stress disorder. P-values for correlation are shown at the end of each bar. Error bars show one standard error.



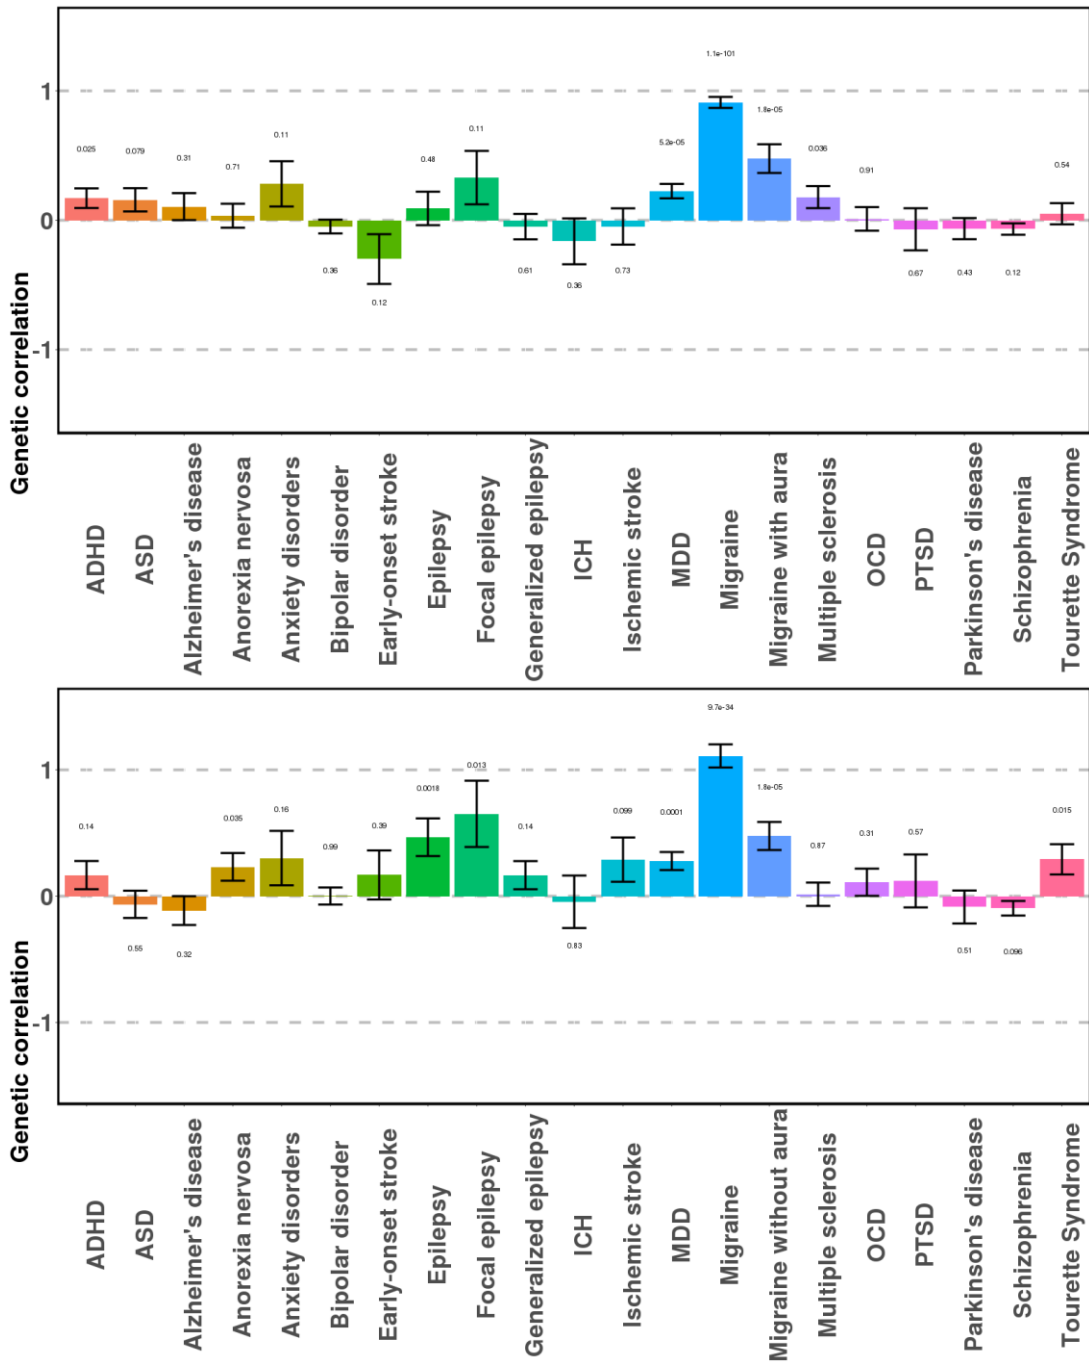

**Fig. S4I and J. Genetic correlations for migraine without aura (top) and migraine with aura (bottom).**

ADHD - attention deficit hyperactivity disorder; ASD – autism spectrum disorder; ICH – intracerebral hemorrhage; MDD – major depressive disorder; OCD – obsessive-compulsive disorder; PTSD – post-traumatic stress disorder. P-values for correlation are shown at the end of each bar. Error bars show one standard error.

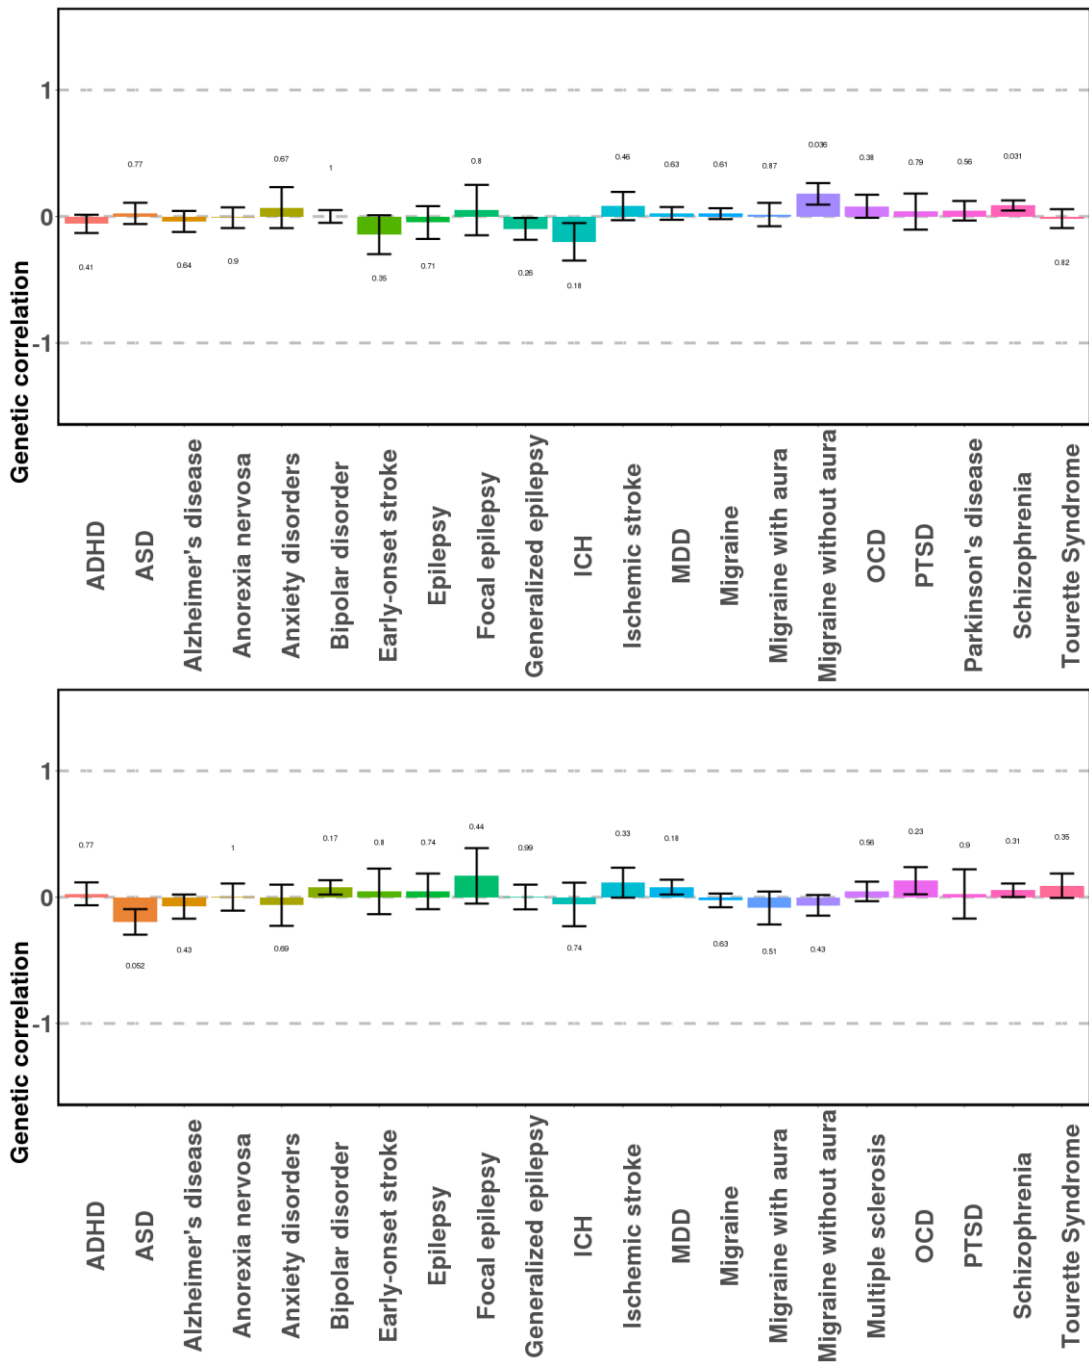

**Fig. S4K and L. Genetic correlations for multiple sclerosis (top) and Parkinson's disease (bottom).**

ADHD - attention deficit hyperactivity disorder; ASD – autism spectrum disorder; ICH – intracerebral hemorrhage; MDD – major depressive disorder; OCD – obsessive-compulsive disorder; PTSD – post-traumatic stress disorder. P-values for correlation are shown at the end of each bar. Error bars show one standard error.

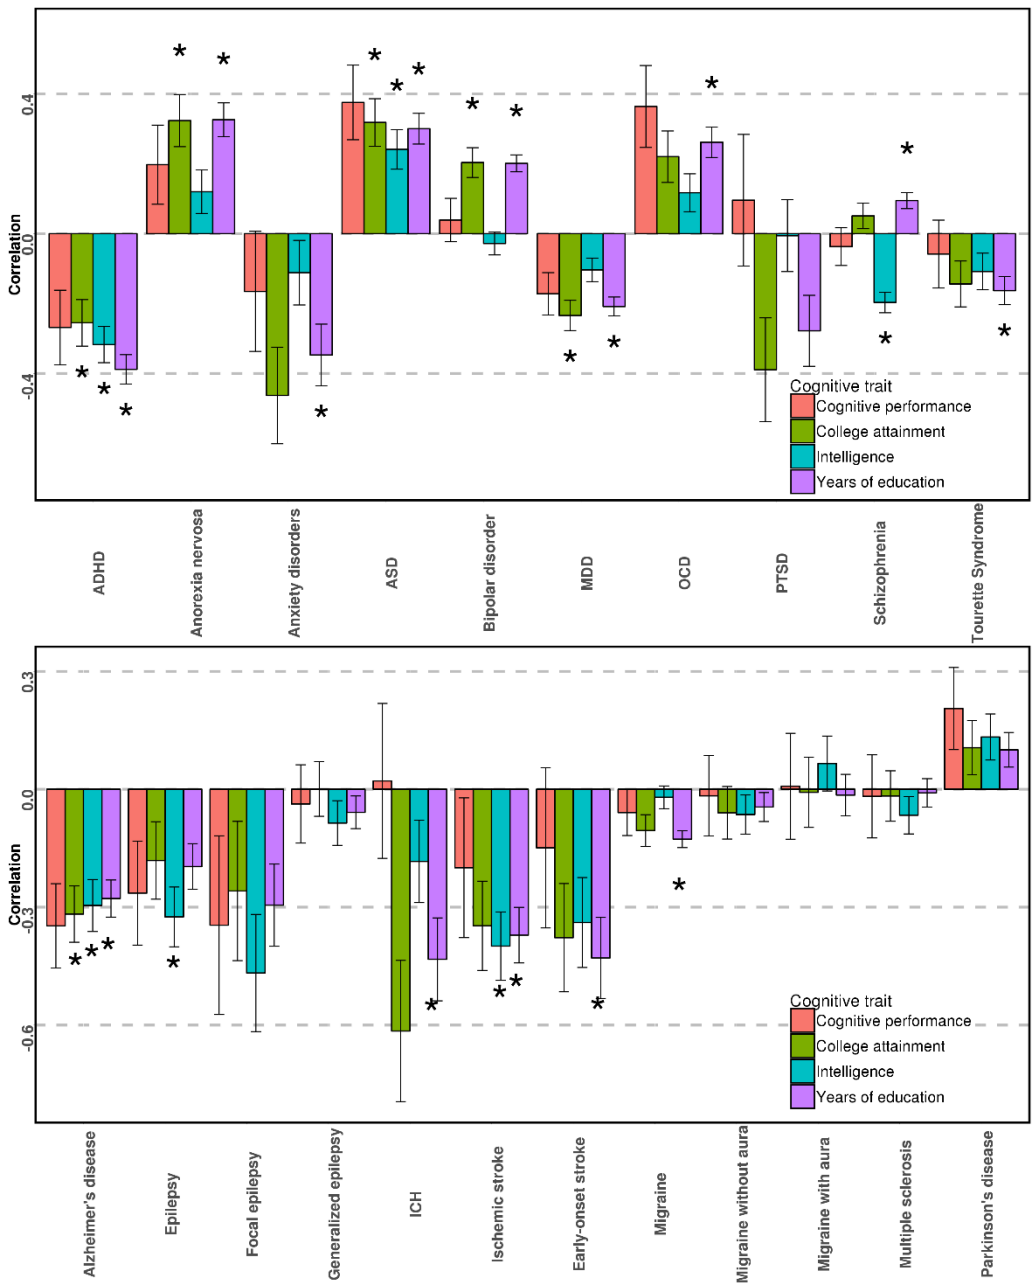

**Fig. S5A and B. Genetic correlations for psychiatric and neurological disorders against cognitive measures.**

Asterisks highlight results which are significant after Bonferroni correction. ADHD - attention deficit hyperactivity disorder; ASD – autism spectrum disorder; MDD – major depressive disorder; OCD – obsessive-compulsive disorder; PTSD – post-traumatic stress disorder; ICH – intracerebral hemorrhage. Dotted line divides the psychiatric phenotypes from the neurological phenotypes. Error bars show one standard error.

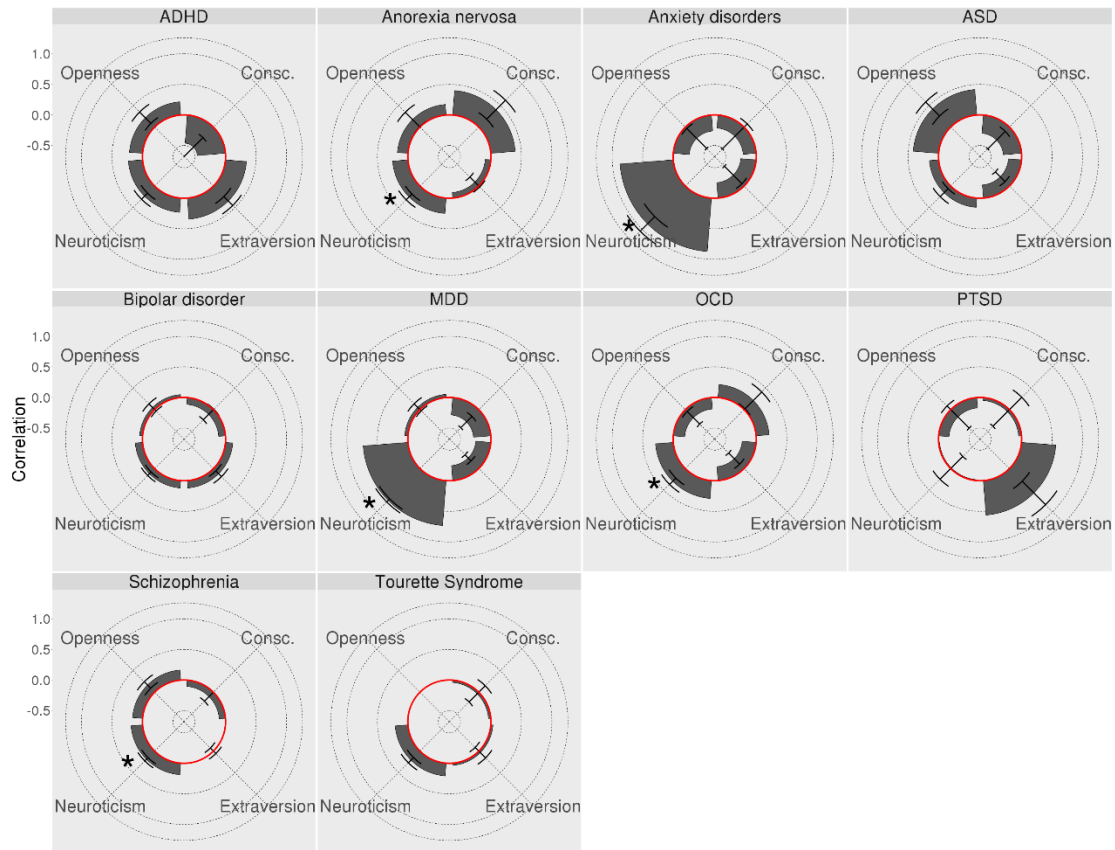

**Fig. S6A. Genetic correlations for psychiatric disorders and four personality axes.**

Grey sectors denote the extent of genetic correlation between each brain disorder and the four personality axes. Red line denotes zero correlation, with positive correlations on the outside and negative correlations on the inside. Error bars show one standard error. Asterisks highlight results which are significant after Bonferroni correction. Consc. – Conscientiousness; ADHD - attention deficit hyperactivity disorder; ASD – autism spectrum disorder; MDD – major depressive disorder; OCD – obsessive-compulsive disorder; PTSD – post-traumatic stress disorder.

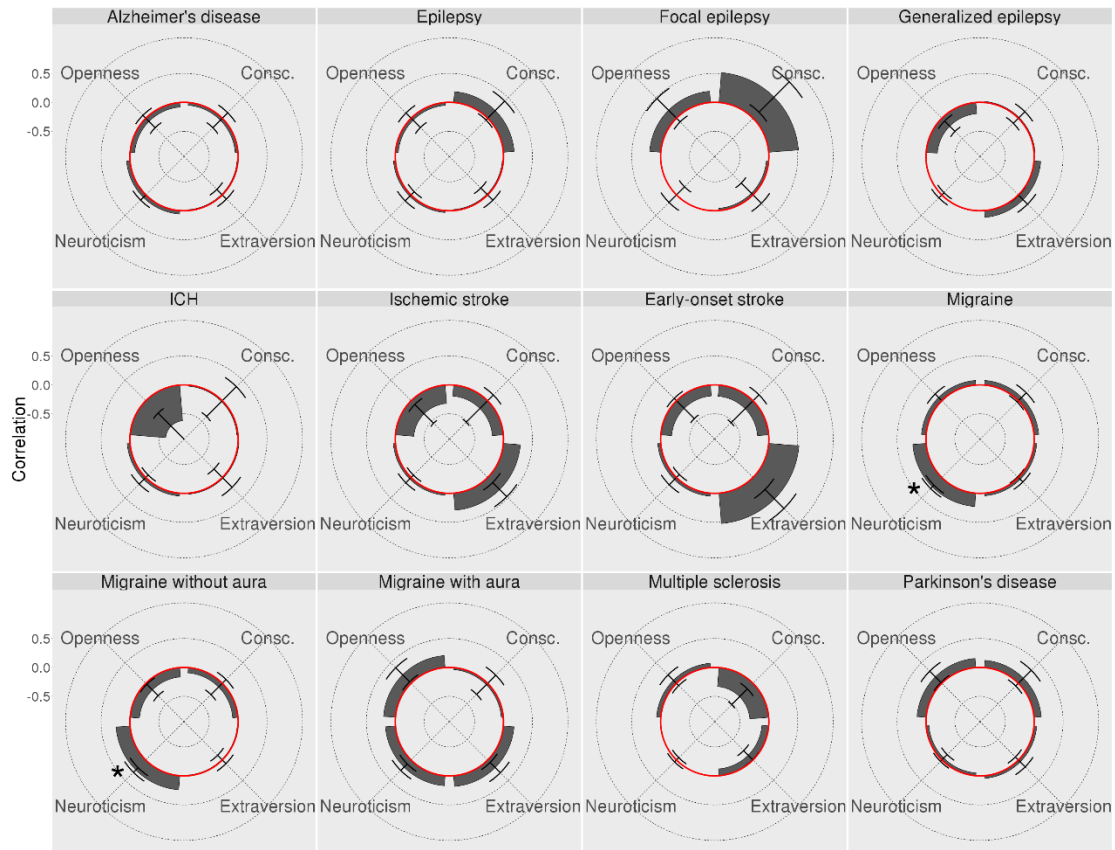

**Fig. S6B. Genetic correlations for neurological disorders and four personality axes.** Grey bars denote the extent of genetic correlation between each brain disorder and the four personality axes. Red line denotes zero correlation, with positive correlations on the outside and negative correlations on the inside. Error bars show one standard error. Asterisks highlight results which are significant after Bonferroni correction. Consc. – Conscientiousness; ICH – intracerebral hemorrhage.

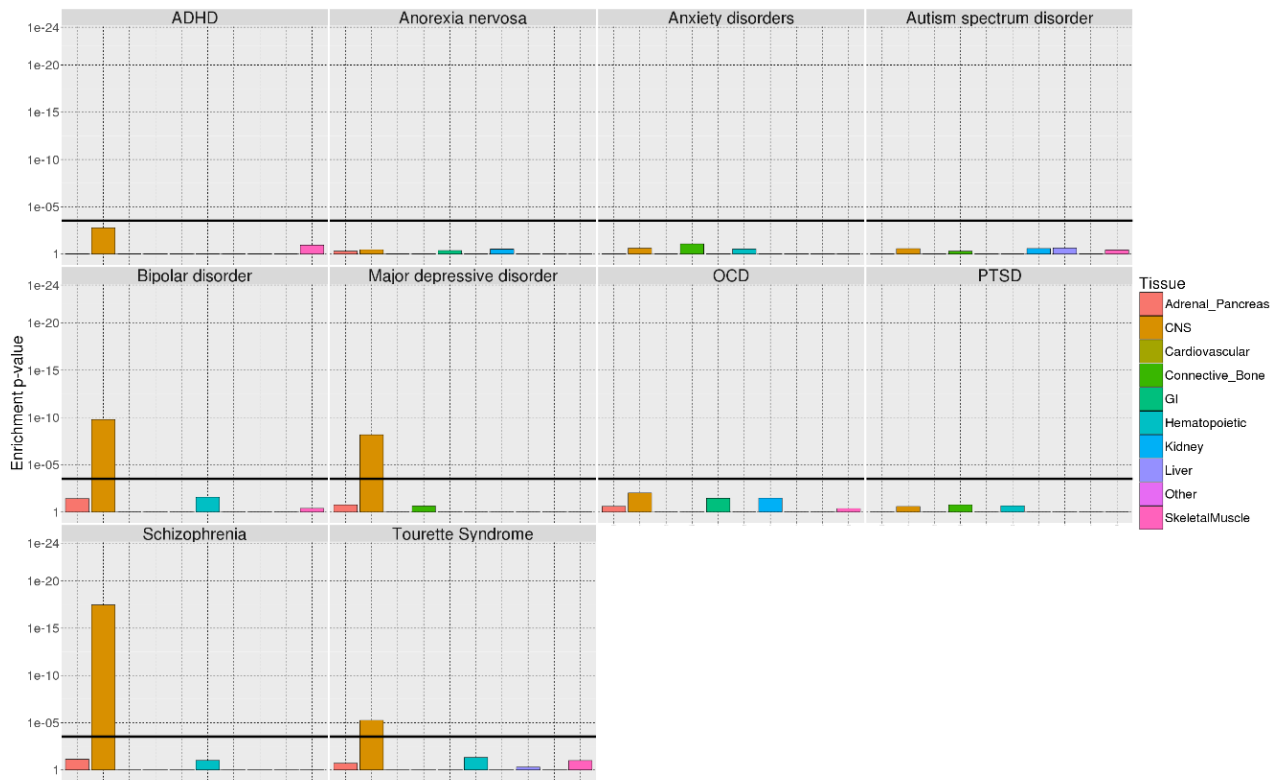

**Fig. S7A. Tissue category heritability enrichment analysis in psychiatric phenotypes**  
 ADHD – attention deficit hyperactivity disorder; CNS – central nervous system; GI – gastro-intestinal system; OCD – obsessive-compulsive disorder; PTSD – post-traumatic stress disorder. Results for largely overlapping dataset in schizophrenia has been previously reported in Finucane et al(26). Black line denotes significance threshold for Bonferroni multiple testing correction,  $p=2.81 \times 10^{-4}$ . Only positive enrichment reported.

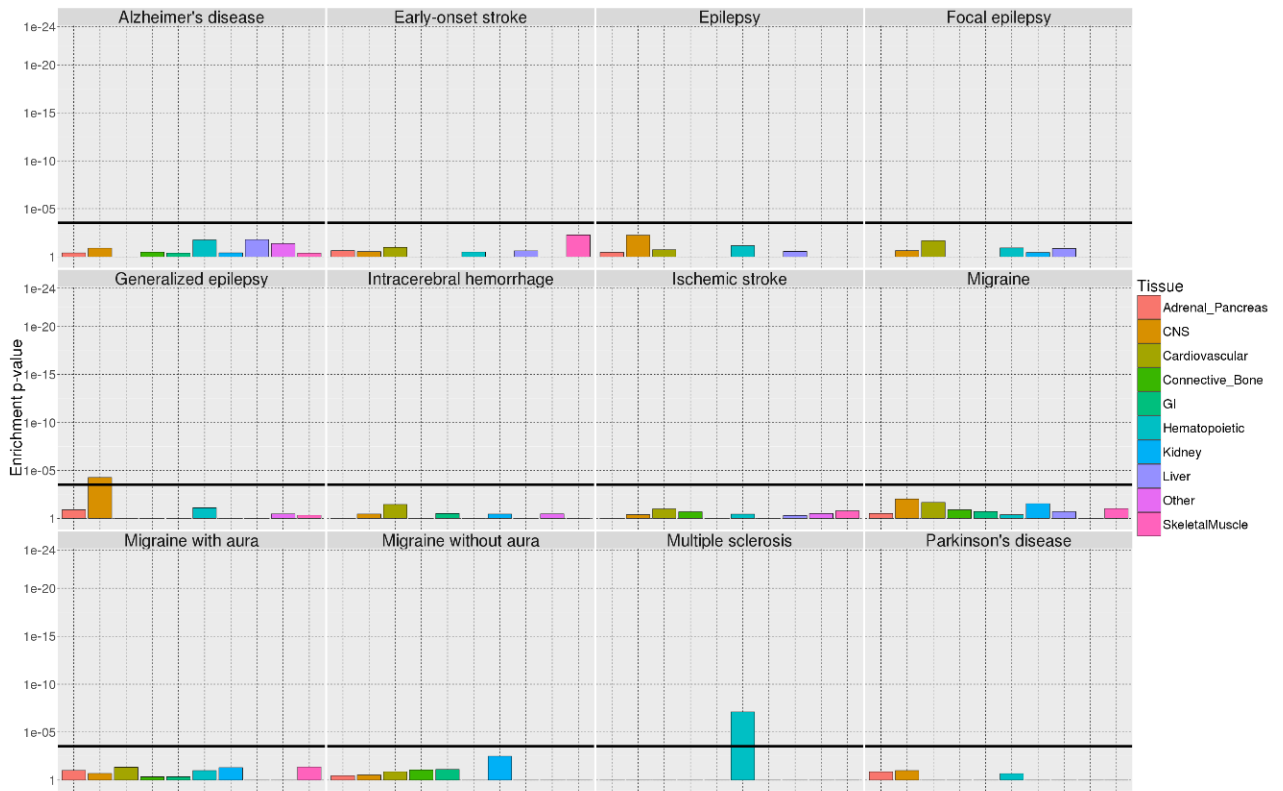

**Fig. S7B. Tissue category heritability enrichment analysis in neurological phenotypes**

CNS – central nervous system; GI – gastro-intestinal system. Black line denotes significance threshold for Bonferroni multiple testing correction,  $p=2.81 \times 10^{-4}$ . Only positive enrichment reported.

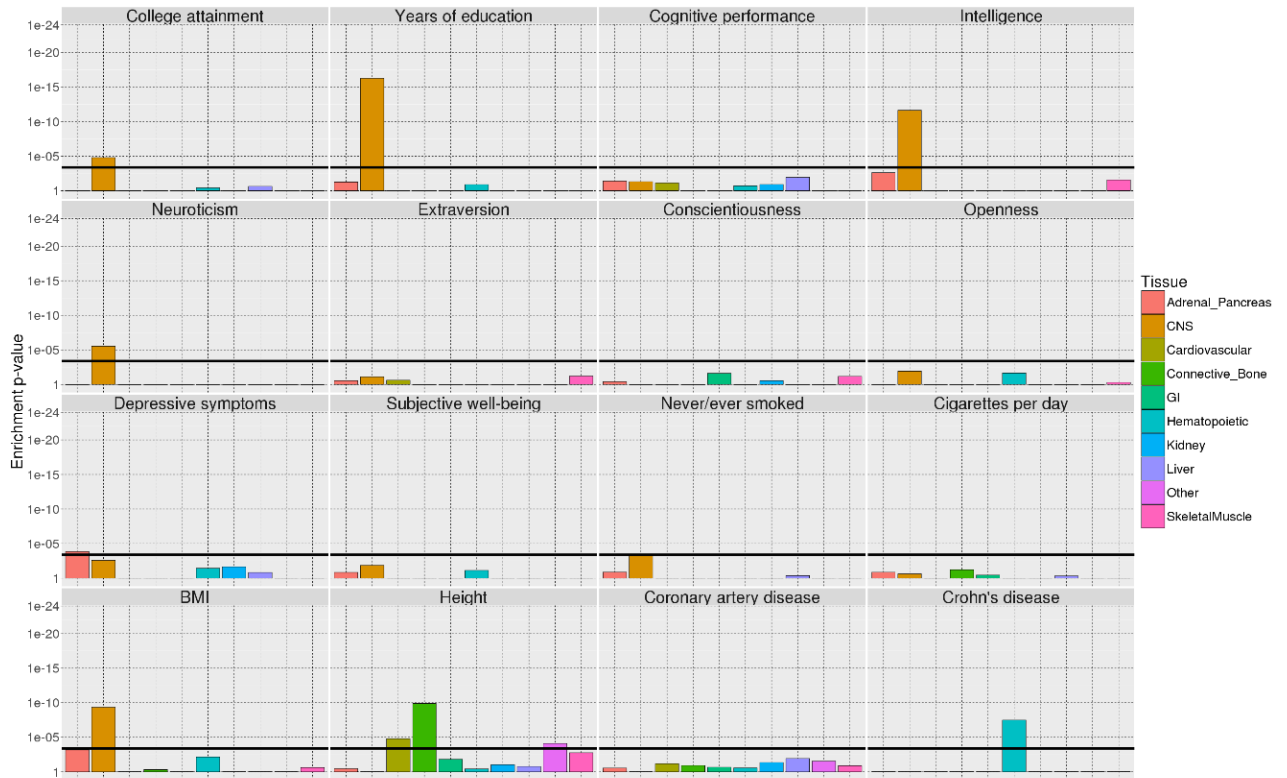

**Fig. S7C. Tissue category heritability enrichment analysis in quantitative and additional phenotypes**

BMI – body-mass index. CNS – central nervous system; GI – gastro-intestinal system. Results for identical datasets in BMI, Crohn’s disease and height have been previously reported in Finucane et al(26), and those for depressive symptoms in Okbay et al(78). The black line denotes significance threshold for Bonferroni multiple testing correction,  $p=4.10 \times 10^{-4}$ . Only positive enrichment reported.



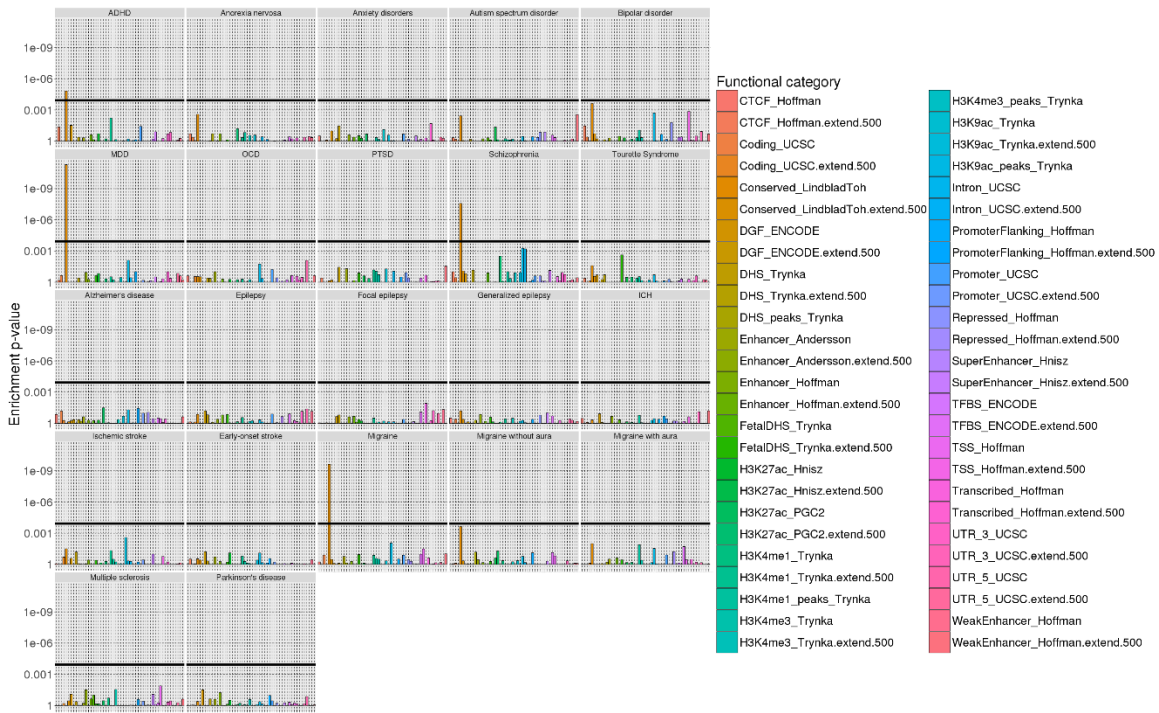

**Fig. S7D. Partitioned heritability analysis across 53 functional categories in study disorders**

ADHD - attention deficit hyperactivity disorder; ICH – intracerebral hemorrhage; MDD – major depressive disorder; OCD – obsessive-compulsive disorder; PTSD – post-traumatic stress disorder. Results for a largely overlapping dataset in schizophrenia have been previously reported in Finucane et al(26). The black line denotes significance threshold for Bonferroni multiple testing correction,  $p=1.17 \times 10^{-4}$ . Only positive enrichment reported.

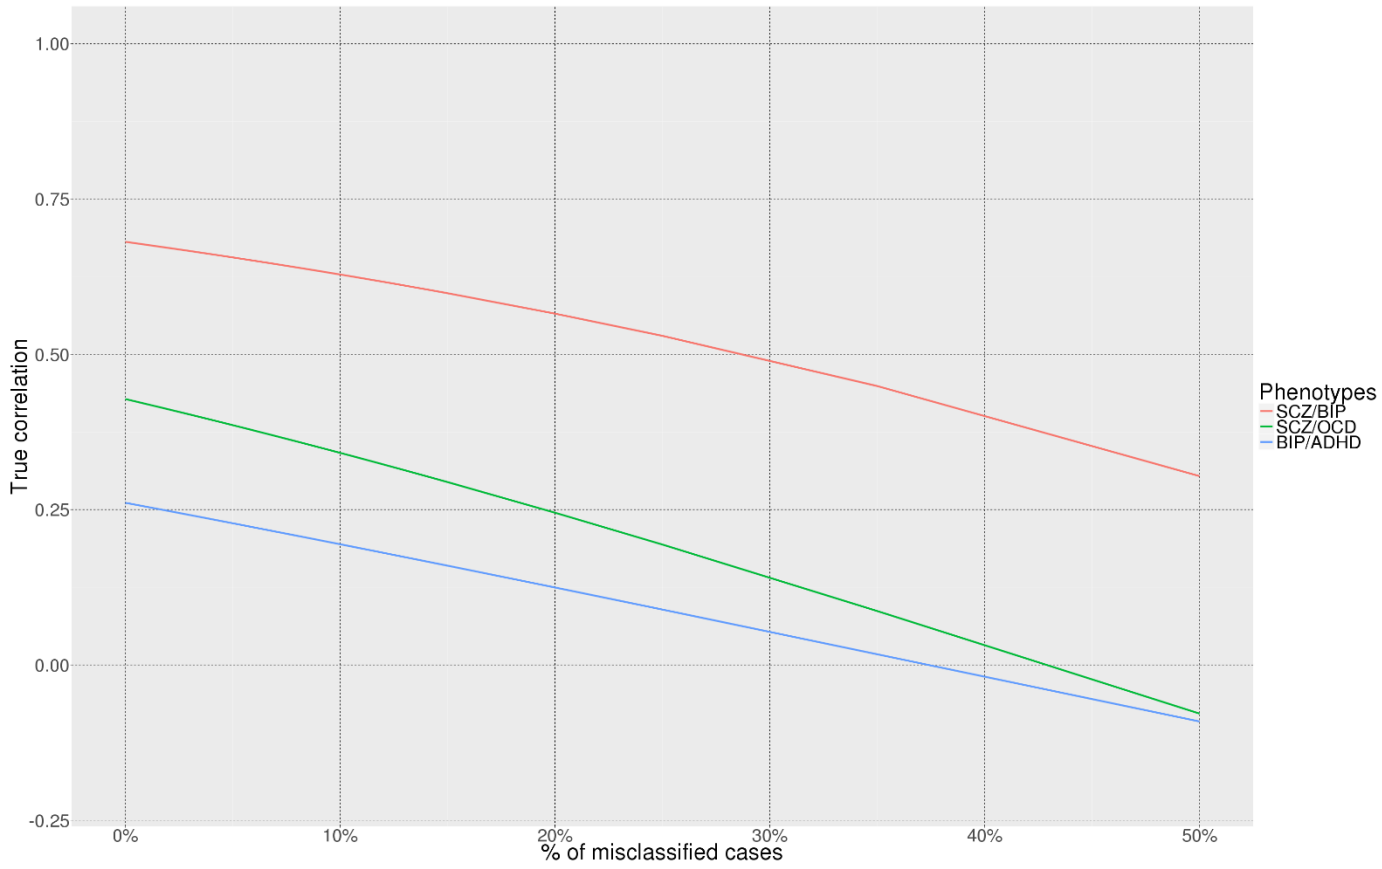

**Fig. S8. Effect of case misclassification on true underlying genetic correlation given the observed results.**

ADHD - attention deficit hyperactivity disorder; BIP – bipolar disorder; OCD – obsessive-compulsive disorder; SCZ – schizophrenia. Genetic correlations as a function of misclassification based on derivation described in the section “Effect of co-morbidity and phenotypic misclassification on correlation estimates”, for the same phenotype pairs as reported in Table S5.

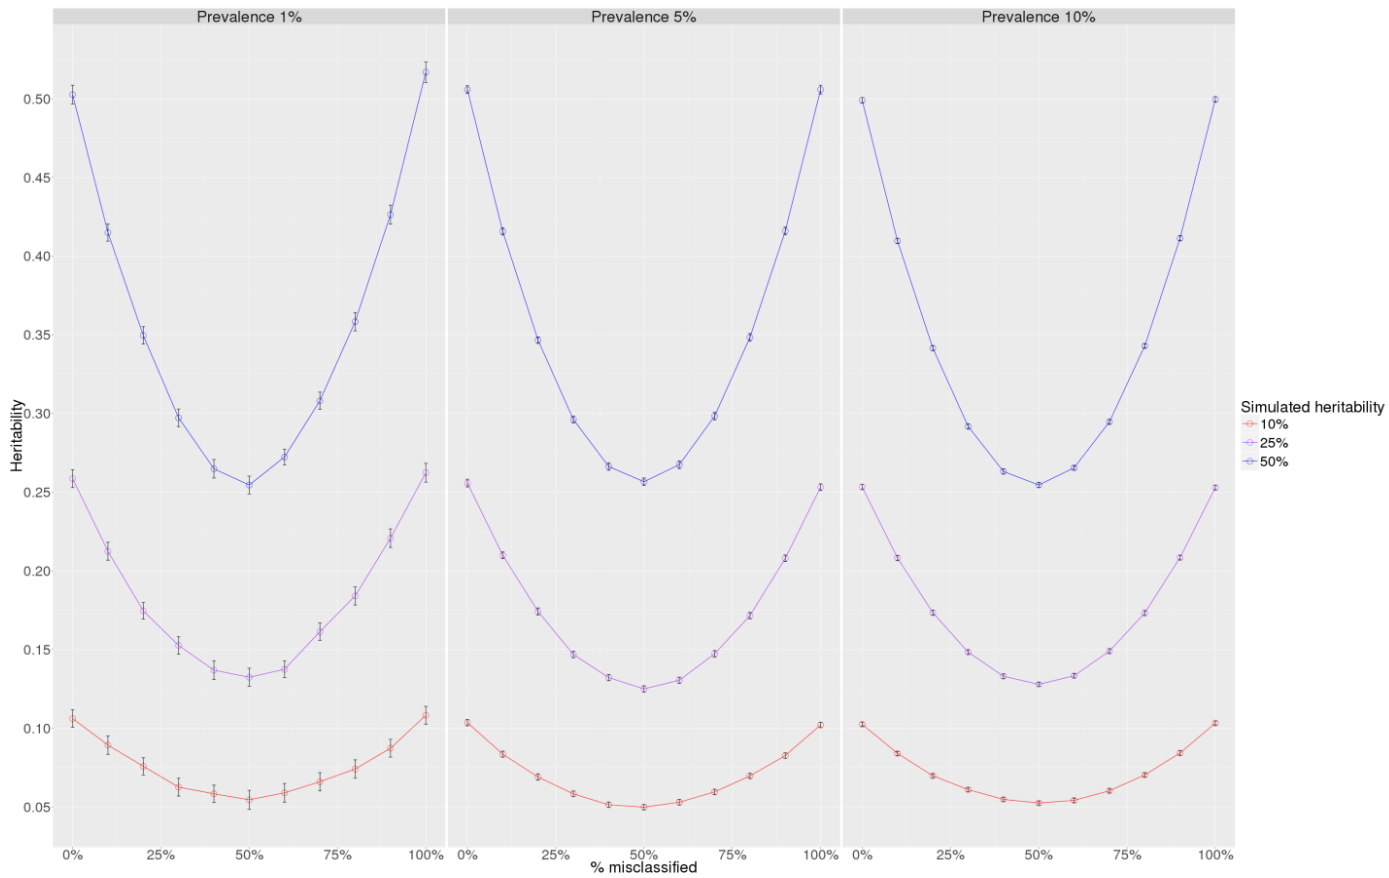

**Fig. S9A. Effect of case misclassification on observed heritability**

See Supplementary Text “Effect of co-morbidity and phenotypic misclassification on correlation estimates” for details. Error bars show one standard error.

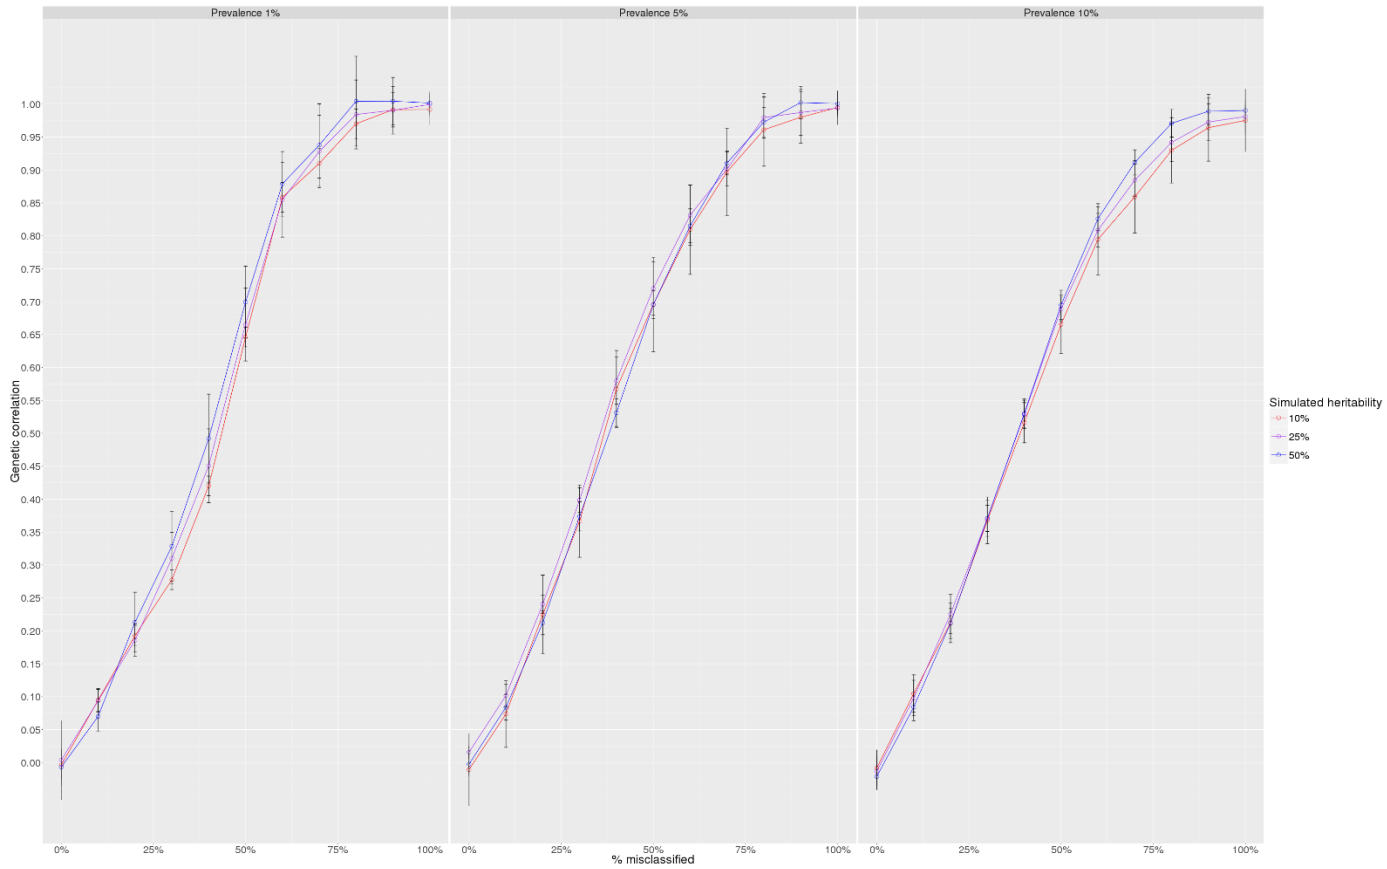

**Fig. S9B. Effect of case misclassification on genetic correlation.**

See Supplementary Text “Effect of co-morbidity and phenotypic misclassification on correlation estimates” for details. Error bars show one standard error.

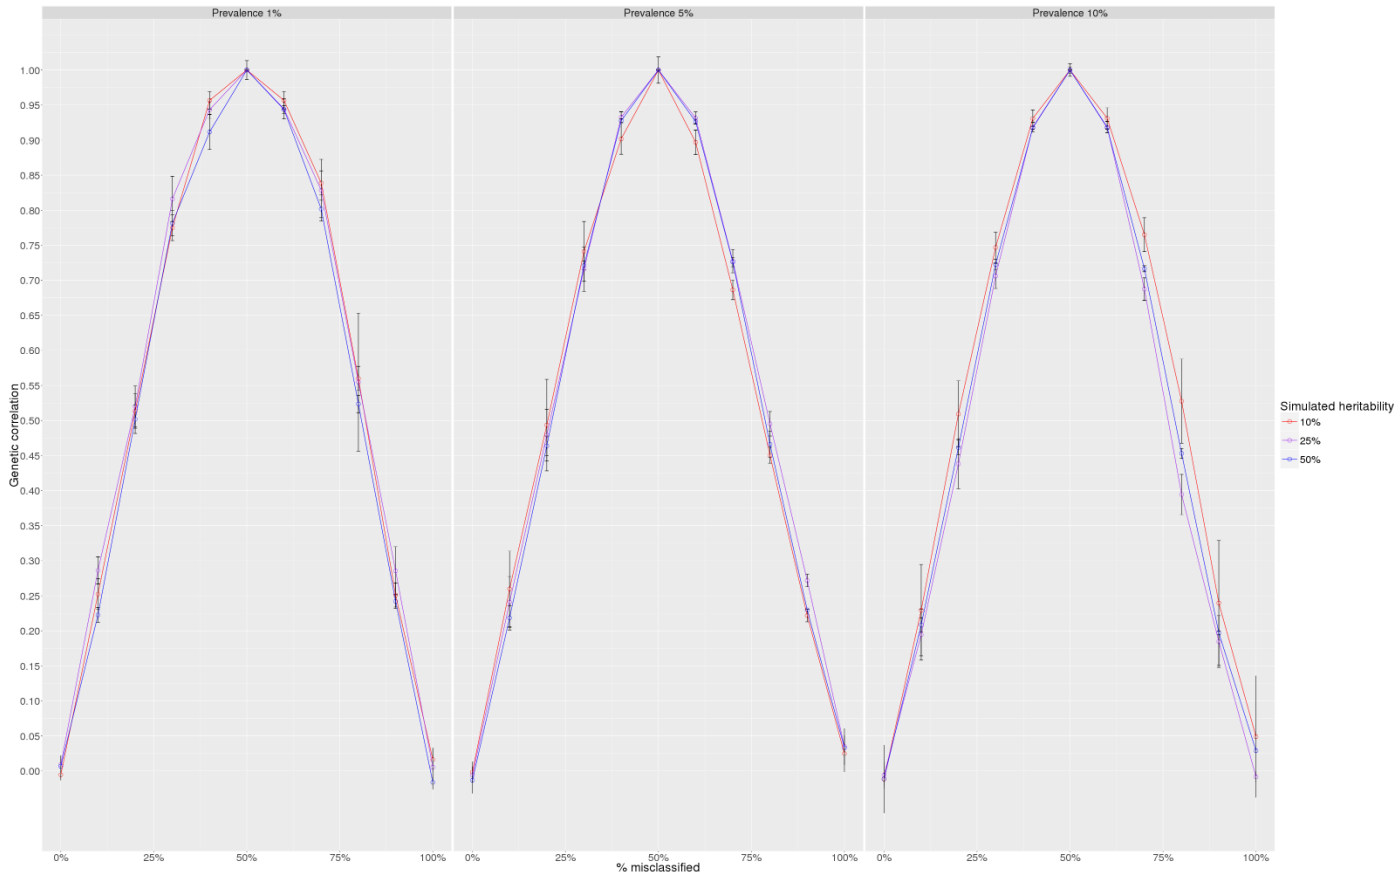

**Fig. S9C. Effect of bidirectional case misclassification on genetic correlation**

See Supplementary Text “Effect of co-morbidity and phenotypic misclassification on correlation estimates” for details. Error bars show one standard error.

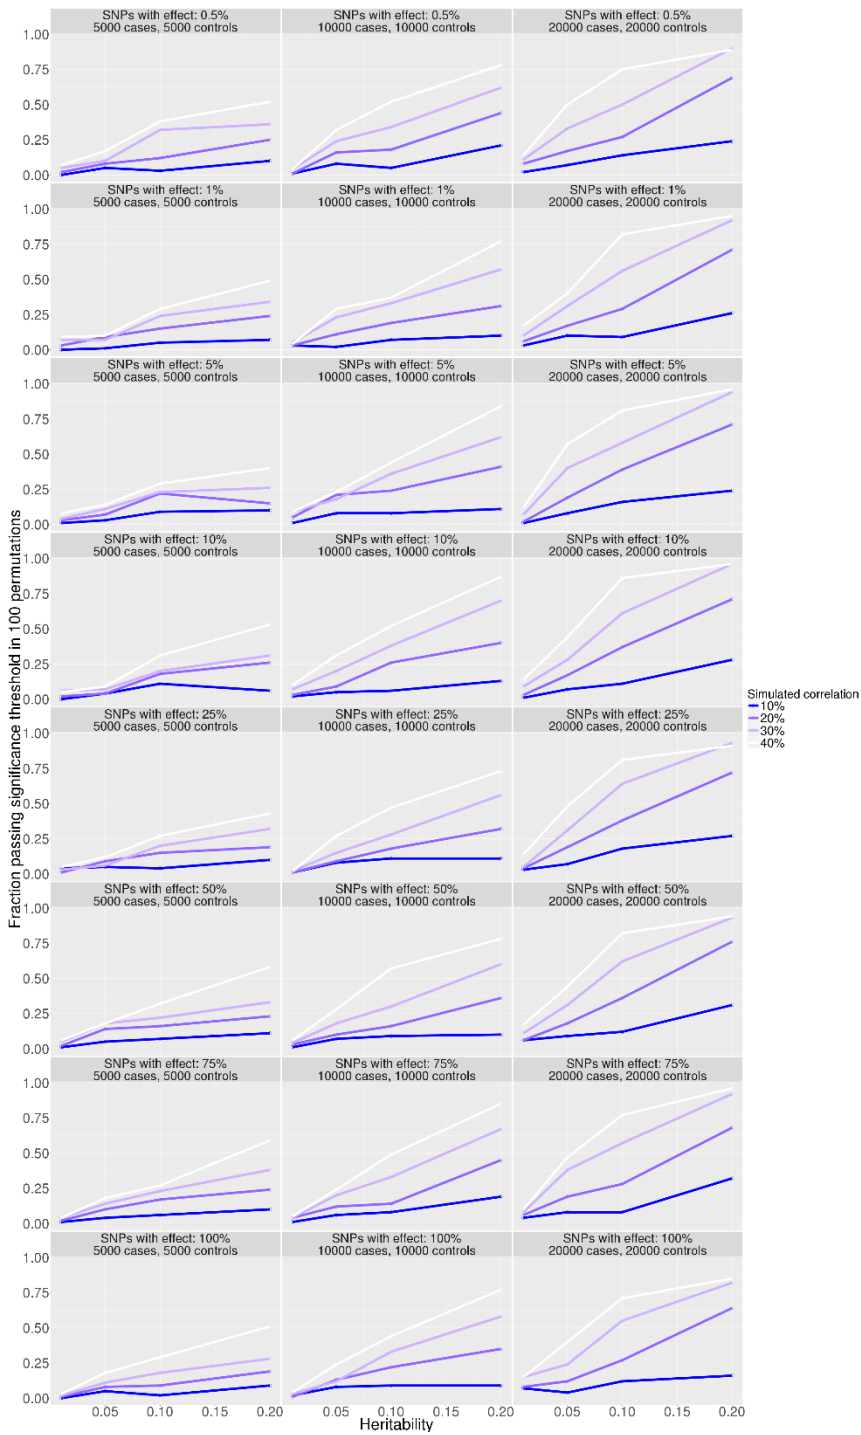

**Fig. S10. Power analysis for detecting genetic correlations.**

Shown at each combination of parameters is the fraction of simulations out of 100 replicates which detect the simulated correlation between the pair of phenotypes and are within the 95% confidence interval from the true correlation.

**Table S1. Dataset features for the brain disorder phenotypes.**

ADHD – attention deficit hyperactivity disorder; OCD – obsessive-compulsive disorder; PTSD – post-traumatic stress disorder; Pop. prev. – population prevalence; AOE – average age of onset; GC – genomic control; Publ. – publication for genotype data; MUP – manuscript under preparation; Preval. ref. – publication for prevalence estimate; PC – personal communication. All age of onset estimates based on personal communication and constitute rough estimates. Anxiety disorders refers to a meta-analysis of five subtypes (generalized anxiety disorder, panic disorder, social phobia, agoraphobia and specific phobias; see reference). Numbers in gray denote a dataset which is non-unique, e.g. all cardioembolic stroke cases and controls are also part of ischemic stroke cases and controls, respectively. For genomic control, - : no GC; + : study-level GC; ++ : meta-analysis GC. Note: genomic control will impact the univariate estimate of heritability, but the genetic correlation estimation is robust to genomic control. References are: a(68), b(69), c(70), d(89), e(22), f(18), g(71), h(72), i(73), j(90), k(74), l(91), m(17), n(92), o(93), p(94), q(95), r(96), s(97), approximated from t(98), approximated from u(99), v(100), and w(101).

| Phenotype                     | Cases  | Controls | Pop. prev. | AOE | Heritability (SE) | GC | Mean $\chi^2$ | Lambda | Intercept (SE) | Publ. | Preval. ref. |
|-------------------------------|--------|----------|------------|-----|-------------------|----|---------------|--------|----------------|-------|--------------|
| <b>Psychiatric disorders</b>  |        |          |            |     |                   |    |               |        |                |       |              |
| ADHD                          | 12,645 | 84,435   | 0.050      | 12  | 0.100 (0.011)     | -  | 1.102         | 1.107  | 1.014 (0.007)  | MUP   | m            |
| Anorexia nervosa              | 3,495  | 10,982   | 0.006      | 15  | 0.172 (0.027)     | +  | 1.077         | 1.086  | 1.012 (0.008)  | a     | n            |
| Anxiety disorders             | 5,761  | 11,765   | 0.100      | 11  | 0.112 (0.045)     | -  | 1.035         | 1.030  | 1.003 (0.008)  | b     | b            |
| Autism spectrum disorder      | 6,197  | 7,377    | 0.010      | 2   | 0.189 (0.025)     | -  | 1.081         | 1.071  | 0.987 (0.009)  | c     | m            |
| Bipolar disorder              | 20,352 | 31,358   | 0.010      | 25  | 0.205 (0.010)     | -  | 1.324         | 1.387  | 1.021 (0.010)  | MUP   | m            |
| Major depressive disorder     | 66,358 | 153,234  | 0.150      | 32  | 0.127 (0.007)     | -  | 1.299         | 1.263  | 1.005 (0.010)  | MUP   | m            |
| OCD                           | 2,936  | 7,279    | 0.016      | 16  | 0.255 (0.037)     | -  | 1.059         | 1.065  | 1.000 (0.007)  | MUP   | o            |
| PTSD                          | 2,424  | 7,113    | 0.080      | 23  | 0.148 (0.065)     | -  | 1.107         | 1.102  | 1.014 (0.007)  | d     | p            |
| Schizophrenia                 | 33,640 | 43,456   | 0.010      | 21  | 0.256 (0.010)     | -  | 1.588         | 1.768  | 1.059 (0.012)  | e     | m            |
| Tourette's syndrome           | 4,220  | 8,994    | 0.005      | 7   | 0.196 (0.025)     | -  | 1.096         | 1.103  | 1.010 (0.007)  | MUP   | q            |
| <b>Neurological disorders</b> |        |          |            |     |                   |    |               |        |                |       |              |
| Alzheimer's disease           | 17,008 | 37,154   | 0.170      | 65  | 0.130 (0.023)     | -  | 1.093         | 1.104  | 1.038 (0.007)  | f     | PC           |
| Epilepsy                      | 7,779  | 20,439   | 0.030      | 25  | 0.101 (0.022)     | +  | 1.047         | 1.057  | 0.993 (0.010)  | g     | r            |
| Focal epilepsy                | 4,601  | 17,985   | 0.020      | 15  | 0.053 (0.026)     | +  | 1.023         | 1.013  | 0.988 (0.009)  | g     | PC           |
| Generalized epilepsy          | 2,525  | 16,244   | 0.008      | 15  | 0.351 (0.039)     | +  | 1.065         | 1.081  | 0.960 (0.009)  | g     | PC           |
| Intracerebral hemorrhage      | 1,545  | 1,481    | 0.002      | 70  | 0.156 (0.060)     | -  | 1.038         | 1.037  | 1.012 (0.007)  | h     | s            |
| Ischemic stroke               | 10,307 | 19,326   | 0.010      | 71  | 0.038 (0.010)     | -  | 1.065         | 1.066  | 1.032 (0.006)  | i     | t            |
| Cardioembolic stroke          | 1,859  | 17,708   | -          | -   | -                 | -  | 1.061         | 1.047  | 1.049 (0.006)  | i     | -            |
| Early-onset stroke            | 3,274  | 11,012   | 0.003      | 50  | 0.051 (0.020)     | -  | 1.029         | 1.033  | 1.009 (0.007)  | i     | PC           |
| Large-vessel disease          | 1,817  | 17,708   | -          | -   | -                 | -  | 1.061         | 1.053  | 1.052 (0.006)  | i     | -            |
| Small-vessel disease          | 1,349  | 17,708   | -          | -   | -                 | -  | 1.048         | 1.047  | 1.052 (0.006)  | i     | -            |
| Migraine                      | 59,673 | 316,078  | 0.160      | 30  | 0.150 (0.007)     | -  | 1.293         | 1.375  | 1.036 (0.010)  | j     | u            |
| Migraine with aura            | 6,332  | 142,817  | 0.075      | 30  | 0.124 (0.024)     | -  | 1.077         | 1.087  | 1.003 (0.007)  | j     | v            |
| Migraine without aura         | 8,348  | 136,758  | 0.130      | 30  | 0.208 (0.025)     | -  | 1.080         | 1.085  | 1.033 (0.007)  | j     | v            |
| Multiple sclerosis            | 5,545  | 12,153   | 0.002      | 30  | 0.141 (0.016)     | ++ | 1.050         | 1.078  | 0.975 (0.008)  | k     | w            |
| Parkinson's disease           | 5,333  | 12,019   | 0.002      | 60  | 0.105 (0.017)     | +  | 1.026         | 1.044  | 0.965 (0.008)  | l     | w            |

**Table S2. Dataset features for the behavioral-cognitive and additional phenotypes**

Numbers in gray denote a sample set which is non-unique, e.g. all samples in the BMI analysis are also part of the height analysis. SE – standard error; Ref. – reference; ISCE - International Standard Classification of Education (1997); NEO-FFI - Neuroticism-Extraversion-Openness Five-Factor Inventory; BMI – body-mass index; CAD – coronary artery disease; MI – myocardial infarction; (d) – dichotomous phenotype; (q) – quantitative phenotype. References are: a(33), b(75), c(76), d(77), e(78), f(102), g(27), h(79), i(63), j(80), k(81) and l(82).

| Phenotype                       | n       | Heritability (SE) | Mean $\chi^2$ | Lambda | Intercept (SE) | Ref. | Definition                                                                                               |
|---------------------------------|---------|-------------------|---------------|--------|----------------|------|----------------------------------------------------------------------------------------------------------|
| <b>Cognitive measures</b>       |         |                   |               |        |                |      |                                                                                                          |
| Years of education (q)          | 293,723 | 0.302 (0.010)     | 1.645         | 1.475  | 0.938 (0.009)  | a    | Years of schooling, measured with the ISCE scale                                                         |
| College attainment (d)          | 120,917 | 0.109 (0.008)     | 1.223         | 1.194  | 1.021 (0.009)  | b    | College completion (ISCE scale value >=5)                                                                |
| Cognitive performance (q)       | 17,989  | 0.191 (0.031)     | 1.075         | 1.065  | 1.001 (0.009)  | c    | General cognitive ability in childhood (ages 6-18)                                                       |
| Intelligence (q)                | 78,308  | 0.194 (0.010)     | 1.299         | 1.260  | 1.015 (0.008)  | d    | Intelligence measures (fluid intelligence scores in adults or general cognitive ability in children)     |
| <b>Personality measures</b>     |         |                   |               |        |                |      |                                                                                                          |
| Subjective well-being (q)       | 298,420 | 0.062 (0.005)     | 1.152         | 1.130  | 1.001 (0.007)  | e    | Self-assessed psychological well-being, based on positive affect or life satisfaction questionnaires     |
| Depressive symptoms (q)         | 161,460 | 0.063 (0.005)     | 1.153         | 1.133  | 1.000 (0.007)  | e    | Score for depressive symptoms, based on positive affect or life satisfaction questionnaires              |
| Neuroticism (q)                 | 170,911 | 0.125 (0.010)     | 1.307         | 1.237  | 0.994 (0.010)  | e    | Personality score for neuroticism symptoms, based on positive affect or life satisfaction questionnaires |
| Extraversion (q)                | 63,030  | 0.049 (0.008)     | 1.073         | 1.065  | 1.008 (0.007)  | f    | Extraversion personality trait, as measured by several different questionnaires                          |
| Agreeableness (q)               | 17,375  | -                 | 1.010         | 0.999  | 1.001 (0.010)  | g    | NEO-FFI questionnaire for personality scores                                                             |
| Conscientiousness (q)           | 17,375  | 0.070 (0.033)     | 1.029         | 1.020  | 1.001 (0.009)  | g    | NEO-FFI questionnaire for personality scores                                                             |
| Openness (q)                    | 17,375  | 0.125 (0.030)     | 1.037         | 1.041  | 0.988 (0.009)  | g    | NEO-FFI questionnaire for personality scores                                                             |
| <b>Smoking-related measures</b> |         |                   |               |        |                |      |                                                                                                          |
| Never/ever smoked (d)           | 74,035  | 0.120 (0.010)     | 1.103         | 1.090  | 0.996 (0.006)  | h    | Lifetime cigarette consumption >= 100                                                                    |
| Cigarettes per day (q)          | 38,617  | 0.057 (0.013)     | 1.049         | 1.053  | 1.007 (0.006)  | h    | Average or maximum number of cigarettes per day                                                          |
| <b>Additional phenotypes</b>    |         |                   |               |        |                |      |                                                                                                          |
| BMI (q)                         | 339,224 | 0.109 (0.003)     | 1.158         | 1.038  | 0.672 (0.008)  | i    | BMI, as measured                                                                                         |
| Height (q)                      | 253,288 | 0.312 (0.014)     | 2.949         | 2.001  | 1.325 (0.019)  | j    | Height, as measured                                                                                      |
| Coronary artery disease (d)     | 86,995  | 0.098 (0.013)     | 1.145         | 1.105  | 1.027 (0.009)  | k    | Presence of CAD, MI, or both                                                                             |
| Crohn's disease (d)             | 20,883  | 0.177 (0.021)     | 1.242         | 1.143  | 1.028 (0.012)  | l    | Presence of Crohn's disease                                                                              |



**Table S3. Comparison of heritability estimates in this study with previously reported estimates based on SNP data.**

ADHD – attention deficit hyperactivity disorder; ESS – effective sample size; OCD – obsessive-compulsive disorder; SE – standard error. References previous reports are: a(17), b(68), c(103), d(89), e(32), f(104), g(105), h(106), and i(107). \* - Previously reported heritability for anxiety disorders is an LDSC analysis of the same dataset; difference between the estimates is due to the current study estimating heritability under unscreened controls.

| Phenotype                            | <i>Previously reported</i> |        | <i>Current study</i> |         | Reference |
|--------------------------------------|----------------------------|--------|----------------------|---------|-----------|
|                                      | Heritability (SE)          | ESS    | Heritability (SE)    | ESS     |           |
| <b><i>Psychiatric disorders</i></b>  |                            |        |                      |         |           |
| ADHD                                 | 0.28 (0.023)               | 12,374 | 0.100 (0.011)        | 43,992  | a         |
| Anorexia nervosa                     | -                          | -      | 0.172 (0.027)        | 10,633  | -         |
| Anxiety disorders*                   | 0.10 (0.037)               | 15,469 | 0.112 (0.045)        | 15,469  | b         |
| Autism spectrum disorder             | 0.17 (0.025)               | 6,729  | 0.189 (0.025)        | 10,610  | a         |
| Bipolar disorder                     | 0.25 (0.012)               | 15,391 | 0.205 (0.010)        | 49,367  | a         |
| Major depressive disorder            | 0.21 (0.021)               | 18,416 | 0.127 (0.007)        | 40,627  | a         |
| OCD                                  | 0.37 (0.070)               | 3,394  | 0.255 (0.037)        | 8,369   | c         |
| PTSD*                                | 0.15(0.060)                | 7,232  | 0.148 (0.065)        | 7,232   | d         |
| Schizophrenia                        | 0.23 (0.008)               | 20,811 | 0.256 (0.010)        | 75,846  | a         |
| Tourette's syndrome                  | 0.58 (0.090)               | 2,146  | 0.196 (0.025)        | 11,489  | c         |
| <b><i>Neurological disorders</i></b> |                            |        |                      |         |           |
|                                      |                            |        | 0.130 (0.023)        |         |           |
| Alzheimer's disease                  | 0.24 (0.030)               | 7,095  | 0.101 (0.022)        | 46,669  | e         |
| Epilepsy                             | 0.32 (0.046)               | 4,041  | 0.053 (0.026)        | 22,538  | f         |
| Focal epilepsy                       | 0.23 (0.102)               | 3,229  | 0.351 (0.039)        | 14,655  | f         |
| Generalized epilepsy                 | 0.36 (0.117)               | 1,134  | 0.156 (0.060)        | 8,741   | f         |
| Intracerebral hemorrhage             | 0.29 (0.110)               | 1,663  | 0.038 (0.010)        | 3,025   | g         |
| Ischemic stroke                      | 0.38 (0.052)               | 8,025  | -                    | 26,888  | h         |
| Cardioembolic stroke                 | 0.33 (0.074)               | 2,592  | 0.051 (0.020)        | 6,730   | h         |
| Early-onset stroke                   | -                          | -      | -                    | 10,095  | h         |
| Large-vessel disease                 | 0.40 (0.076)               | 2,698  | -                    | 6,592   | -         |
| Small-vessel disease                 | 0.16 (0.077)               | 1,993  | 0.150 (0.007)        | 5,014   | h         |
| Migraine                             | -                          | -      | 0.124 (0.024)        | 200,785 | -         |
| Migraine with aura                   | -                          | -      | 0.208 (0.025)        | 24,253  | -         |
| Migraine without aura                | -                          | -      | 0.141 (0.016)        | 31,471  | -         |
| Multiple sclerosis                   | 0.30 (0.030)               | 3,523  | 0.105 (0.017)        | 15,231  | e         |
| Parkinson's disease                  | 0.27 (0.053)               | 20,798 | 0.105 (0.017)        | 14,776  | i         |

**Table S4. Heritability estimates and selected study variables in weighted-least squares analysis.**

P-values are uncorrected for multiple testing. Age of onset refers to the average age of onset of the disorder. Asterisk indicates results which are significant after Bonferroni correction for four tests.

| Study feature         | F-statistic | Adjusted R <sup>2</sup> | P-value |
|-----------------------|-------------|-------------------------|---------|
| Case/control ratio    | 1.758       | 0.035                   | 0.200   |
| Effective sample size | 0.145       | -0.042                  | 0.707   |
| Phenotype prevalence  | 0.075       | -0.046                  | 0.788   |
| Age of onset          | 10.990      | 0.322                   | 0.003*  |

**Table S5. Implied true correlations between selected phenotypes, given co-morbidity estimates from literature.**

ADHD – attention deficit hyperactivity disorder; OCD – obsessive-compulsive disorder. References used for  $\lambda$  values (proportion of cases correctly called cases) are a (40), b(35), c(108). From reference a,  $\lambda$  was calculated by summing over all relevant disorder progression paths. See Supplementary text (“Effect of co-morbidity and phenotypic misclassification on correlation estimates”) for further details.

| Phenotype 1      | Phenotype 2      | True $r_g$ | Observed $r_g$ | $\lambda$ | $h_{1,obs}$ | $h_2$ | Reference |
|------------------|------------------|------------|----------------|-----------|-------------|-------|-----------|
| Schizophrenia    | Bipolar disorder | 0.654      | 0.681          | 0.946     | 0.506       | 0.453 | a         |
| Schizophrenia    | OCD              | 0.120      | 0.428          | 0.683     | 0.506       | 0.505 | b         |
| Bipolar disorder | ADHD             | 0.043      | 0.261          | 0.686     | 0.453       | 0.316 | c         |
| Bipolar disorder | Schizophrenia    | 0.514      | 0.681          | 0.808     | 0.453       | 0.506 | a         |

**Table S6. Proportions of unidirectional misclassification.**

Listed are the proportions of unidirectional misclassification which would be required to reach the observed genetic correlation under the assumption of no true genetic correlation for the significantly correlated disorder-disorder pairs in this study, in order of decreasing significance. ADHD – attention deficit hyperactivity disorder; ASD – autism spectrum disorder; MDD – major depressive disorder; OCD – obsessive-compulsive disorder. Type-subtype pairs (e.g. epilepsy and focal epilepsy) have been excluded.

| Phenotype 1       | Phenotype 2           | Observed $r_g$ | Misclassification % |
|-------------------|-----------------------|----------------|---------------------|
| Bipolar disorder  | Schizophrenia         | 0.681          | 54.5%               |
| MDD               | Schizophrenia         | 0.338          | 14.8%               |
| Bipolar disorder  | MDD                   | 0.351          | 64.2%               |
| MDD               | Migraine              | 0.323          | 24.8%               |
| ADHD              | MDD                   | 0.521          | 46.5%               |
| OCD               | Schizophrenia         | 0.327          | 32.6%               |
| ADHD              | Migraine              | 0.261          | 17.9%               |
| Anxiety disorders | MDD                   | 0.794          | 79.4%               |
| ADHD              | Schizophrenia         | 0.223          | 8.7%                |
| OCD               | Tourette Syndrome     | 0.428          | 55.7%               |
| Bipolar disorder  | OCD                   | 0.311          | 25.0%               |
| ADHD              | Bipolar disorder      | 0.261          | 12.7%               |
| Anorexia nervosa  | OCD                   | 0.517          | 34.9%               |
| Migraine          | Tourette Syndrome     | 0.192          | 14.3%               |
| MDD               | Migraine without aura | 0.225          | 12.2%               |
| Anorexia nervosa  | Schizophrenia         | 0.219          | 14.7%               |
| MDD               | Migraine with aura    | 0.278          | 29.4%               |
| MDD               | Tourette Syndrome     | 0.213          | 12.2%               |
| MDD               | OCD                   | 0.228          | 10.0%               |
| ASD               | Schizophrenia         | 0.208          | 15.5%               |

**Table S7 (separate file). Disorder-disorder (A), disorder-phenotype (B) and phenotype-phenotype (C) correlation results.**

**Table S8. Tissue enrichment analysis for brain disorders.**

Results shown for phenotype-tissue pairs where P-value for enrichment coefficient p-value below the Bonferroni threshold ( $p < 2.81 \times 10^{-4}$ ; data for all pairs in Table S12A). CNS – central nervous system; Coeff. – coefficient; SE – standard error. Results for schizophrenia in a largely overlapping dataset have been previously reported in Finucane et al (38).

| Phenotype                 | Tissue        | Enrichment SE | Coeff.   | SE       | Coeff. p-value |
|---------------------------|---------------|---------------|----------|----------|----------------|
| Schizophrenia             | CNS           | 3.25 0.18     | 1.65E-07 | 1.92E-08 | 3.35E-18       |
| Bipolar disorder          | CNS           | 3.81 0.32     | 1.43E-07 | 2.28E-08 | 1.69E-10       |
| Major depressive disorder | CNS           | 2.76 0.30     | 2.03E-08 | 3.58E-09 | 6.73E-09       |
| Multiple sclerosis        | Hematopoietic | 4.90 0.54     | 2.85E-07 | 5.44E-08 | 8.03E-08       |
| Tourette Syndrome         | CNS           | 4.23 0.78     | 2.32E-07 | 5.29E-08 | 5.67E-06       |
| Generalized epilepsy      | CNS           | 2.79 0.60     | 1.68E-07 | 4.34E-08 | 5.44E-05       |

**Table S9. Tissue enrichment analysis for behavioral-cognitive phenotypes and additional traits**

Results shown for phenotype-tissue pairs where P-value for enrichment coefficient p-value below the Bonferroni threshold ( $p < 4.10 \times 10^{-4}$ ; data for all pairs in Table S12A). BMI – body-mass index; CNS – central nervous system; Coeff. – coefficient; SE – standard error. Results for the same dataset in height, BMI and Crohn’s disease have been previously reported in Finucane et al (38), and depressive symptoms in Okbay et al(78).

| Phenotype           | Tissue           | Enrichment SE | Coeff.   | SE       | Coeff. p-value |
|---------------------|------------------|---------------|----------|----------|----------------|
| Years of education  | CNS              | 2.87 0.19     | 9.51E-08 | 1.15E-08 | 5.66E-17       |
| Intelligence        | CNS              | 3.38 0.31     | 8.34E-08 | 1.20E-08 | 2.26E-12       |
| Height              | Connective_Bone  | 5.32 0.38     | 2.24E-07 | 3.55E-08 | 1.31E-10       |
| BMI                 | CNS              | 2.67 0.18     | 2.73E-08 | 4.46E-09 | 4.39E-10       |
| Crohn's disease     | Hematopoietic    | 4.19 0.43     | 3.60E-07 | 6.66E-08 | 3.15E-08       |
| Neuroticism         | CNS              | 2.47 0.29     | 3.83E-08 | 8.45E-09 | 2.95E-06       |
| College attainment  | CNS              | 3.31 0.45     | 2.71E-08 | 6.52E-09 | 1.59E-05       |
| Height              | Cardiovascular   | 4.23 0.38     | 1.28E-07 | 3.08E-08 | 1.66E-05       |
| Height              | Other            | 3.42 0.21     | 8.26E-08 | 2.19E-08 | 7.84E-05       |
| Depressive symptoms | Adrenal_Pancreas | 5.15 0.94     | 3.77E-08 | 1.04E-08 | 1.47E-04       |
| Never/ever smoked   | CNS              | 3.45 0.73     | 3.06E-08 | 9.13E-09 | 4.04E-04       |

**Table S10. Functional category enrichment analysis for brain disorders**

Results shown for phenotype-tissue pairs where P-value for enrichment coefficient p-value below the Bonferroni threshold ( $p < 1.17 \times 10^{-4}$ ; data for all pairs in Table S12B). ADHD – attention deficit hyperactivity disorder; Coeff. – coefficient; SE – standard error. Results for schizophrenia in a largely overlapping dataset have been previously reported in Finucane et al (38).

| Phenotype                 | Category              | Enrichment | SE   | Coeff.   | SE       | Coeff. p-value |
|---------------------------|-----------------------|------------|------|----------|----------|----------------|
| Major depressive disorder | Conserved_LindbladToh | 19.14      | 2.50 | 1.74E-07 | 2.52E-08 | 2.42E-12       |
| Migraine                  | Conserved_LindbladToh | 16.88      | 2.08 | 1.09E-07 | 1.72E-08 | 1.15E-10       |
| Schizophrenia             | Conserved_LindbladToh | 11.03      | 1.55 | 6.73E-07 | 1.21E-07 | 1.27E-08       |
| ADHD                      | Conserved_LindbladToh | 27.15      | 6.24 | 2.00E-07 | 4.61E-08 | 7.46E-06       |
| Migraine without aura     | Conserved_LindbladToh | 20.64      | 4.99 | 9.63E-08 | 2.61E-08 | 1.12E-04       |
| Bipolar disorder          | Conserved_LindbladToh | 9.95       | 1.98 | 3.80E-07 | 1.03E-07 | 1.17E-04       |

**Table S11. Functional category enrichment analysis for behavioral-cognitive phenotypes and additional traits**

Results shown for phenotype-tissue pairs where P-value for enrichment coefficient p-value below the Bonferroni threshold ( $p < 1.71 \times 10^{-4}$ ; data for all pairs in Table S12B). BMI – body-mass index; Coeff. – coefficient; SE – standard error. Results for the same dataset in height and BMI have been previously reported in Finucane et al (38).

| Phenotype          | Category              | Enrichment | SE   | Coeff.   | SE       | Coeff. p-value |
|--------------------|-----------------------|------------|------|----------|----------|----------------|
| BMI                | Conserved_LindbladToh | 16.68      | 1.69 | 2.76E-07 | 3.34E-08 | 7.28E-17       |
| Years of education | Conserved_LindbladToh | 14.96      | 1.68 | 6.56E-07 | 8.80E-08 | 4.67E-14       |
| Height             | Conserved_LindbladToh | 11.07      | 1.59 | 5.15E-07 | 9.79E-08 | 7.20E-08       |
| BMI                | H3K9ac_peaks_Trynka   | 7.00       | 0.97 | 1.18E-07 | 2.41E-08 | 4.79E-07       |
| Neuroticism        | Conserved_LindbladToh | 11.96      | 2.95 | 2.26E-07 | 5.10E-08 | 4.50E-06       |
| Intelligence       | Conserved_LindbladToh | 13.50      | 2.56 | 3.51E-07 | 8.24E-08 | 9.77E-06       |
| College attainment | Conserved_LindbladToh | 16.32      | 3.31 | 1.61E-07 | 3.92E-08 | 1.98E-05       |

**Table S12 (separate file). Tissue (A) and functional category (B) enrichment analysis results for brain disorders, behavioral-cognitive phenotypes, and additional traits.**

**Table S13 (separate file). Data sources, responsible consortia, and data availability.**

## References and Notes

1. J. B. Martin, The integration of neurology, psychiatry, and neuroscience in the 21st century. *Am. J. Psychiatry* **159**, 695–704 (2002). [doi:10.1176/appi.ajp.159.5.695](https://doi.org/10.1176/appi.ajp.159.5.695) [Medline](#)
2. J. W. Smoller, Disorders and borders: Psychiatric genetics and nosology. *Am. J. Med. Genet. B. Neuropsychiatr. Genet.* **162**, 559–578 (2013). [doi:10.1002/ajmg.b.32174](https://doi.org/10.1002/ajmg.b.32174) [Medline](#)
3. T. R. Insel, P. S. Wang, Rethinking mental illness. *JAMA* **303**, 1970–1971 (2010). [doi:10.1001/jama.2010.555](https://doi.org/10.1001/jama.2010.555) [Medline](#)
4. T. J. Polderman, B. Benyamin, C. A. de Leeuw, P. F. Sullivan, A. van Bochoven, P. M. Visscher, D. Posthuma, Meta-analysis of the heritability of human traits based on fifty years of twin studies. *Nat. Genet.* **47**, 702–709 (2015). [doi:10.1038/ng.3285](https://doi.org/10.1038/ng.3285) [Medline](#)
5. K. S. Kendler, C. A. Prescott, J. Myers, M. C. Neale, The structure of genetic and environmental risk factors for common psychiatric and substance use disorders in men and women. *Arch. Gen. Psychiatry* **60**, 929–937 (2003). [doi:10.1001/archpsyc.60.9.929](https://doi.org/10.1001/archpsyc.60.9.929) [Medline](#)
6. R. Jensen, L. J. Stovner, Epidemiology and comorbidity of headache. *Lancet Neurol.* **7**, 354–361 (2008). [doi:10.1016/S1474-4422\(08\)70062-0](https://doi.org/10.1016/S1474-4422(08)70062-0) [Medline](#)
7. J. Nuyen, F. G. Schellevis, W. A. Satariano, P. M. Spreeuwenberg, M. D. Birkner, G. A. M. van den Bos, P. P. Groenewegen, Comorbidity was associated with neurologic and psychiatric diseases: A general practice-based controlled study. *J. Clin. Epidemiol.* **59**, 1274–1284 (2006). [doi:10.1016/j.jclinepi.2006.01.005](https://doi.org/10.1016/j.jclinepi.2006.01.005) [Medline](#)
8. R. M. Hirschfeld, J. R. Calabrese, M. M. Weissman, M. Reed, M. A. Davies, M. A. Frye, P. E. Keck Jr., L. Lewis, S. L. McElroy, J. P. McNulty, K. D. Wagner, Screening for bipolar disorder in the community. *J. Clin. Psychiatry* **64**, 53–59 (2003). [doi:10.4088/JCP.v64n0111](https://doi.org/10.4088/JCP.v64n0111) [Medline](#)
9. A. Pan, Q. Sun, O. I. Okereke, K. M. Rexrode, F. B. Hu, Depression and risk of stroke morbidity and mortality: A meta-analysis and systematic review. *JAMA* **306**, 1241–1249 (2011). [doi:10.1001/jama.2011.1282](https://doi.org/10.1001/jama.2011.1282) [Medline](#)
10. A. Lo-Castro, P. Curatolo, Epilepsy associated with autism and attention deficit hyperactivity disorder: Is there a genetic link? *Brain Dev.* **36**, 185–193 (2014). [doi:10.1016/j.braindev.2013.04.013](https://doi.org/10.1016/j.braindev.2013.04.013) [Medline](#)
11. E. N. Bertelsen, J. T. Larsen, L. Petersen, J. Christensen, S. Dalsgaard, Childhood Epilepsy, Febrile Seizures, and Subsequent Risk of ADHD. *Pediatrics* **138**, e20154654 (2016). [doi:10.1542/peds.2015-4654](https://doi.org/10.1542/peds.2015-4654) [Medline](#)
12. C. G. de Kovel, H. Trucks, I. Helbig, H. C. Mefford, C. Baker, C. Leu, C. Kluck, H. Muhle, S. von Spiczak, P. Ostertag, T. Obermeier, A. A. Kleefuss-Lie, K. Hallmann, M. Steffens, V. Gaus, K. M. Klein, H. M. Hamer, F. Rosenow, E. H. Brilstra, D. K. Trenité, M. E. M. Swinkels, Y. G. Weber, I. Unterberger, F. Zimprich, L. Urak, M. Feucht, K. Fuchs, R. S. Møller, H. Hjalgrim, P. De Jonghe, A. Suls, I.-M. Rückert, H.-E. Wichmann, A. Franke, S. Schreiber, P. Nürnberg, C. E. Elger, H. Lerche, U. Stephani, B. P. C. Koeleman, D. Lindhout, E. E. Eichler, T. Sander, Recurrent microdeletions at 15q11.2 and 16p13.11

- predispose to idiopathic generalized epilepsies. *Brain* **133**, 23–32 (2010). [doi:10.1093/brain/awp262](https://doi.org/10.1093/brain/awp262) [Medline](#)
13. T. D. Graves, M. G. Hanna, Neurological channelopathies. *Postgrad. Med. J.* **81**, 20–32 (2005). [doi:10.1136/pgmj.2004.022012](https://doi.org/10.1136/pgmj.2004.022012) [Medline](#)
  14. J. Haan, G. M. Terwindt, A. M. van den Maagdenberg, A. H. Stam, M. D. Ferrari, A review of the genetic relation between migraine and epilepsy. *Cephalalgia* **28**, 105–113 (2008). [Medline](#)
  15. S. DeBette, Y. Kamatani, T. M. Metso, M. Kloss, G. Chauhan, S. T. Engelter, A. Pezzini, V. Thijs, H. S. Markus, M. Dichgans, C. Wolf, R. Dittrich, E. Touzé, A. M. Southerland, Y. Samson, S. Abboud, Y. Béjot, V. Caso, A. Bersano, A. Gschwendtner, M. Sessa, J. Cole, C. Lamy, E. Medeiros, S. Beretta, L. H. Bonati, A. J. Grau, P. Michel, J. J. Majersik, P. Sharma, L. Kalashnikova, M. Nazarova, L. Dobrynina, E. Bartels, B. Guillon, E. G. van den Herik, I. Fernandez-Cadenas, K. Jood, M. A. Nalls, F.-E. De Leeuw, C. Jern, Y.-C. Cheng, I. Werner, A. J. Metso, C. Lichy, P. A. Lyrer, T. Brandt, G. B. Boncoraglio, H.-E. Wichmann, C. Gieger, A. D. Johnson, T. Böttcher, M. Castellano, D. Arveiler, M. A. Ikram, M. M. B. Breteler, A. Padovani, J. F. Meschia, G. Kuhlenbäumer, A. Rofls, B. B. Worrall, E.-B. Ringelstein, D. Zelenika, T. Tatlisumak, M. Lathrop, D. Leys, P. Amouyel, J. Dallongeville; International Stroke Genetics Consortium; CADISP Group, Common variation in PHACTR1 is associated with susceptibility to cervical artery dissection. *Nat. Genet.* **47**, 78–83 (2015). [doi:10.1038/ng.3154](https://doi.org/10.1038/ng.3154) [Medline](#)
  16. S. M. Purcell, N. R. Wray, J. L. Stone, P. M. Visscher, M. C. O'Donovan, P. F. Sullivan, P. Sklar; International Schizophrenia Consortium, Common polygenic variation contributes to risk of schizophrenia and bipolar disorder. *Nature* **460**, 748–752 (2009). [Medline](#)
  17. Cross-Disorder Group of the Psychiatric Genomics Consortium, Genetic relationship between five psychiatric disorders estimated from genome-wide SNPs. *Nat. Genet.* **45**, 984–994 (2013). [doi:10.1038/ng.2711](https://doi.org/10.1038/ng.2711) [Medline](#)
  18. J. C. Lambert, C. A. Ibrahim-Verbaas, D. Harold, A. C. Naj, R. Sims, C. Bellenguez, A. L. DeStafano, J. C. Bis, G. W. Beecham, B. Grenier-Boley, G. Russo, T. A. Thornton-Wells, N. Jones, A. V. Smith, V. Chouraki, C. Thomas, M. A. Ikram, D. Zelenika, B. N. Vardarajan, Y. Kamatani, C. F. Lin, A. Gerrish, H. Schmidt, B. Kunkle, M. L. Dunstan, A. Ruiz, M. T. Bihoreau, S. H. Choi, C. Reitz, F. Pasquier, C. Cruchaga, D. Craig, N. Amin, C. Berr, O. L. Lopez, P. L. De Jager, V. Deramecourt, J. A. Johnston, D. Evans, S. Lovestone, L. Letenneur, F. J. Morón, D. C. Rubinsztein, G. Eiriksdottir, K. Sleegers, A. M. Goate, N. Fiévet, M. W. Huentelman, M. Gill, K. Brown, M. I. Kamboh, L. Keller, P. Barberger-Gateau, B. McGuinness, E. B. Larson, R. Green, A. J. Myers, C. Dufouil, S. Todd, D. Wallon, S. Love, E. Rogaeva, J. Gallacher, P. St George-Hyslop, J. Clarimon, A. Lleo, A. Bayer, D. W. Tsuang, L. Yu, M. Tzolaki, P. Bossù, G. Spalletta, P. Proitsi, J. Collinge, S. Sorbi, F. Sanchez-Garcia, N. C. Fox, J. Hardy, M. C. Deniz Naranjo, P. Bosco, R. Clarke, C. Brayne, D. Galimberti, M. Mancuso, F. Matthews, S. Moebus, P. Mecocci, M. Del Zompo, W. Maier, H. Hampel, A. Pilotto, M. Bullido, F. Panza, P. Caffarra, B. Nacmias, J. R. Gilbert, M. Mayhaus, L. Lannefelt, H. Hakonarson, S. Pichler, M. M. Carrasquillo, M. Ingelsson, D. Beekly, V. Alvarez, F. Zou, O. Valladares, S. G. Younkin, E. Coto, K. L. Hamilton-Nelson, W. Gu, C. Razquin, P. Pastor, I. Mateo, M. J. Owen, K. M. Faber, P. V. Jonsson, O. Combarros, M. C. O'Donovan, L. B.

- Cantwell, H. Soininen, D. Blacker, S. Mead, T. H. Mosley Jr., D. A. Bennett, T. B. Harris, L. Fratiglioni, C. Holmes, R. F. de Bruijn, P. Passmore, T. J. Montine, K. Bettens, J. I. Rotter, A. Brice, K. Morgan, T. M. Foroud, W. A. Kukull, D. Hannequin, J. F. Powell, M. A. Nalls, K. Ritchie, K. L. Lunetta, J. S. Kauwe, E. Boerwinkle, M. Riemenschneider, M. Boada, M. Hiltunen, E. R. Martin, R. Schmidt, D. Rujescu, L. S. Wang, J. F. Dartigues, R. Mayeux, C. Tzourio, A. Hofman, M. M. Nöthen, C. Graff, B. M. Psaty, L. Jones, J. L. Haines, P. A. Holmans, M. Lathrop, M. A. Pericak-Vance, L. J. Launer, L. A. Farrer, C. M. van Duijn, C. Van Broeckhoven, V. Moskvina, S. Seshadri, J. Williams, G. D. Schellenberg, P. Amouyel, M. Lathrop, M. A. Pericak-Vance, L. J. Launer, L. A. Farrer, C. M. van Duijn, C. Van Broeckhoven, V. Moskvina, S. Seshadri, J. Williams, G. D. Schellenberg, P. Amouyel; European Alzheimer's Disease Initiative (EADI); Genetic and Environmental Risk in Alzheimer's Disease; Alzheimer's Disease Genetic Consortium; Cohorts for Heart and Aging Research in Genomic Epidemiology, Meta-analysis of 74,046 individuals identifies 11 new susceptibility loci for Alzheimer's disease. *Nat. Genet.* **45**, 1452–1458 (2013). [doi:10.1038/ng.2802](https://doi.org/10.1038/ng.2802) [Medline](#)
19. T. W. Mühleisen, M. Leber, T. G. Schulze, J. Strohmaier, F. Degenhardt, J. Treutlein, M. Mattheisen, A. J. Forstner, J. Schumacher, R. Breuer, S. Meier, S. Herms, P. Hoffmann, A. Lacour, S. H. Witt, A. Reif, B. Müller-Myhsok, S. Lucae, W. Maier, M. Schwarz, H. Vedder, J. Kammerer-Ciernioch, A. Pfennig, M. Bauer, M. Hautzinger, S. Moebus, L. Priebe, P. M. Czerski, J. Hauser, J. Lissowska, N. Szeszenia-Dabrowska, P. Brennan, J. D. McKay, A. Wright, P. B. Mitchell, J. M. Fullerton, P. R. Schofield, G. W. Montgomery, S. E. Medland, S. D. Gordon, N. G. Martin, V. Krasnow, A. Chuchalin, G. Babadjanova, G. Pantelejeva, L. I. Abramova, A. S. Tiganov, A. Polonikov, E. Khusnutdinova, M. Alda, P. Grof, G. A. Rouleau, G. Turecki, C. Laprise, F. Rivas, F. Mayoral, M. Kogevinas, M. Grigoriou-Serbanescu, P. Propping, T. Becker, M. Rietschel, M. M. Nöthen, S. Cichon, Genome-wide association study reveals two new risk loci for bipolar disorder. *Nat. Commun.* **5**, 3339 (2014). [doi:10.1038/ncomms4339](https://doi.org/10.1038/ncomms4339) [Medline](#)
20. V. Anttila, B. S. Winsvold, P. Gormley, T. Kurth, F. Bettella, G. McMahon, M. Kallela, R. Malik, B. de Vries, G. Terwindt, S. E. Medland, U. Todt, W. L. McArdle, L. Quaye, M. Koironen, M. A. Ikram, T. Lehtimäki, A. H. Stam, L. Ligthart, J. Wedenoja, I. Dunham, B. M. Neale, P. Palta, E. Hamalainen, M. Schürks, L. M. Rose, J. E. Buring, P. M. Ridker, S. Steinberg, H. Stefansson, F. Jakobsson, D. A. Lawlor, D. M. Evans, S. M. Ring, M. Färkkilä, V. Artto, M. A. Kaunisto, T. Freilinger, J. Schoenen, R. R. Frants, N. Pelzer, C. M. Weller, R. Zielman, A. C. Heath, P. A. F. Madden, G. W. Montgomery, N. G. Martin, G. Borck, H. Göbel, A. Heinze, K. Heinze-Kuhn, F. M. K. Williams, A.-L. Hartikainen, A. Pouta, J. van den Ende, A. G. Uitterlinden, A. Hofman, N. Amin, J.-J. Hottenga, J. M. Vink, K. Heikkilä, M. Alexander, B. Muller-Myhsok, S. Schreiber, T. Meitinger, H. E. Wichmann, A. Aromaa, J. G. Eriksson, B. Traynor, D. Trabzuni, E. Rossin, K. Lage, S. B. R. Jacobs, J. R. Gibbs, E. Birney, J. Kaprio, B. W. Penninx, D. I. Boomsma, C. van Duijn, O. Raitakari, M.-R. Jarvelin, J.-A. Zwart, L. Cherkas, D. P. Strachan, C. Kubisch, M. D. Ferrari, A. M. J. M. van den Maagdenberg, M. Dichgans, M. Wessman, G. D. Smith, K. Stefansson, M. J. Daly, D. R. Nyholt, D. Chasman, A. Palotie; North American Brain Expression Consortium; UK Brain Expression Consortium, Genome-wide meta-analysis identifies new susceptibility loci for migraine. *Nat. Genet.* **45**, 912–917 (2013). [doi:10.1038/ng.2676](https://doi.org/10.1038/ng.2676) [Medline](#)



21. M. A. Nalls, N. Pankratz, C. M. Lill, C. B. Do, D. G. Hernandez, M. Saad, A. L. DeStefano, E. Kara, J. Bras, M. Sharma, C. Schulte, M. F. Keller, S. Arepalli, C. Letson, C. Edsall, H. Stefansson, X. Liu, H. Pliner, J. H. Lee, R. Cheng, M. A. Ikram, J. P. A. Ioannidis, G. M. Hadjigeorgiou, J. C. Bis, M. Martinez, J. S. Perlmutter, A. Goate, K. Marder, B. Fiske, M. Sutherland, G. Xiomerisiou, R. H. Myers, L. N. Clark, K. Stefansson, J. A. Hardy, P. Heutink, H. Chen, N. W. Wood, H. Houlden, H. Payami, A. Brice, W. K. Scott, T. Gasser, L. Bertram, N. Eriksson, T. Foroud, A. B. Singleton; International Parkinson's Disease Genomics Consortium (IPDGC); Parkinson's Study Group (PSG) Parkinson's Research: The Organized GENetics Initiative (PROGENI); 23andMe; GenePD; NeuroGenetics Research Consortium (NGRC); Hussman Institute of Human Genomics (HIHG); Ashkenazi Jewish Dataset Investigator; Cohorts for Health and Aging Research in Genetic Epidemiology (CHARGE); North American Brain Expression Consortium (NABEC); United Kingdom Brain Expression Consortium (UKBEC); Greek Parkinson's Disease Consortium; Alzheimer Genetic Analysis Group, Large-scale meta-analysis of genome-wide association data identifies six new risk loci for Parkinson's disease. *Nat. Genet.* **46**, 989–993 (2014). [doi:10.1038/ng.3043](https://doi.org/10.1038/ng.3043) [Medline](#)
22. Schizophrenia Working Group of the Psychiatric Genomics Consortium, Biological insights from 108 schizophrenia-associated genetic loci. *Nature* **511**, 421–427 (2014). [doi:10.1038/nature13595](https://doi.org/10.1038/nature13595) [Medline](#)
23. N. Solovieff, C. Cotsapas, P. H. Lee, S. M. Purcell, J. W. Smoller, Pleiotropy in complex traits: Challenges and strategies. *Nat. Rev. Genet.* **14**, 483–495 (2013). [doi:10.1038/nrg3461](https://doi.org/10.1038/nrg3461) [Medline](#)
24. B. Bulik-Sullivan, H. K. Finucane, V. Anttila, A. Gusev, F. R. Day, P.-R. Loh, L. Duncan, J. R. B. Perry, N. Patterson, E. B. Robinson, M. J. Daly, A. L. Price, B. M. Neale; ReproGen Consortium; Psychiatric Genomics Consortium; Genetic Consortium for Anorexia Nervosa of the Wellcome Trust Case Control Consortium 3, An atlas of genetic correlations across human diseases and traits. *Nat. Genet.* **47**, 1236–1241 (2015). [doi:10.1038/ng.3406](https://doi.org/10.1038/ng.3406) [Medline](#)
25. See materials and methods and other supplementary materials.
26. H. K. Finucane, B. Bulik-Sullivan, A. Gusev, G. Trynka, Y. Reshef, P.-R. Loh, V. Anttila, H. Xu, C. Zang, K. Farh, S. Ripke, F. R. Day, S. Purcell, E. Stahl, S. Lindstrom, J. R. B. Perry, Y. Okada, S. Raychaudhuri, M. J. Daly, N. Patterson, B. M. Neale, A. L. Price; ReproGen Consortium; Schizophrenia Working Group of the Psychiatric Genomics Consortium; RACI Consortium, Partitioning heritability by functional annotation using genome-wide association summary statistics. *Nat. Genet.* **47**, 1228–1235 (2015). [doi:10.1038/ng.3404](https://doi.org/10.1038/ng.3404) [Medline](#)
27. M. H. de Moor, P. T. Costa, A. Terracciano, R. F. Krueger, E. J. C. de Geus, T. Toshiko, B. W. J. H. Penninx, T. Esko, P. A. F. Madden, J. Derringer, N. Amin, G. Willemsen, J.-J. Hottenga, M. A. Distel, M. Uda, S. Sanna, P. Spinhoven, C. A. Hartman, P. Sullivan, A. Realo, J. Allik, A. C. Heath, M. L. Pergadia, A. Agrawal, P. Lin, R. Grucza, T. Nobile, M. Ciullo, D. Rujescu, I. Giegling, B. Konte, E. Widen, D. L. Cousminer, J. G. Eriksson, A. Palotie, L. Peltonen, M. Luciano, A. Tenesa, G. Davies, L. M. Lopez, N. K. Hansell, S. E. Medland, L. Ferrucci, D. Schlessinger, G. W. Montgomery, M. J. Wright, Y. S. Aulchenko, A. C. J. W. Janssens, B. A. Oostra, A. Metspalu, G. R. Abecasis, I. J. Deary,

- K. Rääkkönen, L. J. Bierut, N. G. Martin, C. M. van Duijn, D. I. Boomsma, Meta-analysis of genome-wide association studies for personality. *Mol. Psychiatry* **17**, 337–349 (2012). [doi:10.1038/mp.2010.128](https://doi.org/10.1038/mp.2010.128) [Medline](#)
28. R. A. Power, M. Pluess, Heritability estimates of the Big Five personality traits based on common genetic variants. *Transl. Psychiatry* **5**, e604 (2015). [doi:10.1038/tp.2015.96](https://doi.org/10.1038/tp.2015.96) [Medline](#)
29. C. M. Haworth, M. J. Wright, M. Luciano, N. G. Martin, E. J. C. de Geus, C. E. M. van Beijsterveldt, M. Bartels, D. Posthuma, D. I. Boomsma, O. S. P. Davis, Y. Kovas, R. P. Corley, J. C. Defries, J. K. Hewitt, R. K. Olson, S.-A. Rhea, S. J. Wadsworth, W. G. Iacono, M. McGue, L. A. Thompson, S. A. Hart, S. A. Petrill, D. Lubinski, R. Plomin, The heritability of general cognitive ability increases linearly from childhood to young adulthood. *Mol. Psychiatry* **15**, 1112–1120 (2010). [doi:10.1038/mp.2009.55](https://doi.org/10.1038/mp.2009.55) [Medline](#)
30. I. J. Deary, J. Yang, G. Davies, S. E. Harris, A. Tenesa, D. Liewald, M. Luciano, L. M. Lopez, A. J. Gow, J. Corley, P. Redmond, H. C. Fox, S. J. Rowe, P. Haggarty, G. McNeill, M. E. Goddard, D. J. Porteous, L. J. Whalley, J. M. Starr, P. M. Visscher, Genetic contributions to stability and change in intelligence from childhood to old age. *Nature* **482**, 212–215 (2012). [doi:10.1038/nature10781](https://doi.org/10.1038/nature10781) [Medline](#)
31. S. De Rubeis, X. He, A. P. Goldberg, C. S. Poultney, K. Samocha, A. E. Cicek, Y. Kou, L. Liu, M. Fromer, S. Walker, T. Singh, L. Klei, J. Kosmicki, F. Shih-Chen, B. Aleksic, M. Biscaldi, P. F. Bolton, J. M. Brownfeld, J. Cai, N. G. Campbell, A. Carracedo, M. H. Chahrour, A. G. Chiocchetti, H. Coon, E. L. Crawford, S. R. Curran, G. Dawson, E. Duketis, B. A. Fernandez, L. Gallagher, E. Geller, S. J. Guter, R. S. Hill, J. Ionita-Laza, P. Jimenez Gonzalez, H. Kilpinen, S. M. Klauck, A. Kolevzon, I. Lee, I. Lei, J. Lei, T. Lehtimäki, C.-F. Lin, A. Ma'ayan, C. R. Marshall, A. L. McInnes, B. Neale, M. J. Owen, N. Ozaki, M. Parellada, J. R. Parr, S. Purcell, K. Puura, D. Rajagopalan, K. Rehnström, A. Reichenberg, A. Sabo, M. Sachse, S. J. Sanders, C. Schafer, M. Schulte-Rüther, D. Skuse, C. Stevens, P. Szatmari, K. Tammimies, O. Valladares, A. Voran, W. Li-San, L. A. Weiss, A. J. Willsey, T. W. Yu, R. K. C. Yuen, E. H. Cook, C. M. Freitag, M. Gill, C. M. Hultman, T. Lehner, A. Palotie, G. D. Schellenberg, P. Sklar, M. W. State, J. S. Sutcliffe, C. A. Walsh, S. W. Scherer, M. E. Zwick, J. C. Barrett, D. J. Cutler, K. Roeder, B. Devlin, M. J. Daly, J. D. Buxbaum; DDD Study; Homozygosity Mapping Collaborative for Autism; UK10K Consortium, Synaptic, transcriptional and chromatin genes disrupted in autism. *Nature* **515**, 209–215 (2014). [doi:10.1038/nature13772](https://doi.org/10.1038/nature13772) [Medline](#)
32. S. H. Lee, D. Harold, D. R. Nyholt, M. E. Goddard, K. T. Zondervan, J. Williams, G. W. Montgomery, N. R. Wray, P. M. Visscher; ANZGene Consortium; International Endogene Consortium; Genetic and Environmental Risk for Alzheimer's disease Consortium, Estimation and partitioning of polygenic variation captured by common SNPs for Alzheimer's disease, multiple sclerosis and endometriosis. *Hum. Mol. Genet.* **22**, 832–841 (2013). [doi:10.1093/hmg/dds491](https://doi.org/10.1093/hmg/dds491) [Medline](#)
33. A. Okbay, J. P. Beauchamp, M. A. Fontana, J. J. Lee, T. H. Pers, C. A. Rietveld, P. Turley, G.-B. Chen, V. Emilsson, S. F. W. Meddens, S. Oskarsson, J. K. Pickrell, K. Thom, P. Timshel, R. de Vlaming, A. Abdellaoui, T. S. Ahluwalia, J. Bacelis, C. Baumbach, G. Bjornsdottir, J. H. Brandsma, M. Pina Concas, J. Derringer, N. A. Furlotte, T. E.

Galesloot, G. Girotto, R. Gupta, L. M. Hall, S. E. Harris, E. Hofer, M. Horikoshi, J. E. Huffman, K. Kaasik, I. P. Kalafati, R. Karlsson, A. Kong, J. Lahti, S. J. van der Lee, C. deLeeuw, P. A. Lind, K.-O. Lindgren, T. Liu, M. Mangino, J. Marten, E. Mihailov, M. B. Miller, P. J. van der Most, C. Oldmeadow, A. Payton, N. Pervjakova, W. J. Peyrot, Y. Qian, O. Raitakari, R. Rueedi, E. Salvi, B. Schmidt, K. E. Schraut, J. Shi, A. V. Smith, R. A. Poot, B. St Pourcain, A. Teumer, G. Thorleifsson, N. Verweij, D. Vuckovic, J. Wellmann, H.-J. Westra, J. Yang, W. Zhao, Z. Zhu, B. Z. Alizadeh, N. Amin, A. Bakshi, S. E. Baumeister, G. Biino, K. Bønnelykke, P. A. Boyle, H. Campbell, F. P. Cappuccio, G. Davies, J.-E. De Neve, P. Deloukas, I. Demuth, J. Ding, P. Eibich, L. Eisele, N. Eklund, D. M. Evans, J. D. Faul, M. F. Feitosa, A. J. Forstner, I. Gandin, B. Gunnarsson, B. V. Halldórsson, T. B. Harris, A. C. Heath, L. J. Hocking, E. G. Holliday, G. Homuth, M. A. Horan, J.-J. Hottenga, P. L. de Jager, P. K. Joshi, A. Jugessur, M. A. Kaakinen, M. Kähönen, S. Kanoni, L. Keltigangas-Järvinen, L. A. L. M. Kiemenev, I. Kolcic, S. Koskinen, A. T. Kraja, M. Kroh, Z. Kutalik, A. Latvala, L. J. Launer, M. P. Lebreton, D. F. Levinson, P. Lichtenstein, P. Lichtner, D. C. M. Liewald, A. Loukola, P. A. Madden, R. Mägi, T. Mäki-Opas, R. E. Marioni, P. Marques-Vidal, G. A. Meddens, G. McMahon, C. Meisinger, T. Meitinger, Y. Milaneschi, L. Milani, G. W. Montgomery, R. Myhre, C. P. Nelson, D. R. Nyholt, W. E. Ollier, A. Palotie, L. Paternoster, N. L. Pedersen, K. E. Petrovic, D. J. Porteous, K. Räikkönen, S. M. Ring, A. Robino, O. Rostapshova, I. Rudan, A. Rustichini, V. Salomaa, A. R. Sanders, A. P. Sarin, H. Schmidt, R. J. Scott, B. H. Smith, J. A. Smith, J. A. Staessen, E. Steinhausen-Thiessen, K. Strauch, A. Terracciano, M. D. Tobin, S. Ulivi, S. Vaccargiu, L. Quaye, F. J. van Rooij, C. Venturini, A. A. Vinkhuyzen, U. Völker, H. Völzke, J. M. Vonk, D. Vozzi, J. Waage, E. B. Ware, G. Willemsen, J. R. Attia, D. A. Bennett, K. Berger, L. Bertram, H. Bisgaard, D. I. Boomsma, I. B. Borecki, U. Bültmann, C. F. Chabris, F. Cucca, D. Cusi, I. J. Deary, G. V. Dedoussis, C. M. van Duijn, J. G. Eriksson, B. Franke, L. Franke, P. Gasparini, P. V. Gejman, C. Gieger, H. J. Grabe, J. Gratten, P. J. Groenen, V. Gudnason, P. van der Harst, C. Hayward, D. A. Hinds, W. Hoffmann, E. Hyppönen, W. G. Iacono, B. Jacobsson, M. R. Jarvelin, K. H. Jöckel, J. Kaprio, S. L. Kardia, T. Lehtimäki, S. F. Lehrer, P. K. Magnusson, N. G. Martin, M. McGue, A. Metspalu, N. Pendleton, B. W. Penninx, M. Perola, N. Pirastu, M. Pirastu, O. Polasek, D. Posthuma, C. Power, M. A. Province, N. J. Samani, D. Schlessinger, R. Schmidt, T. I. Sørensen, T. D. Spector, K. Stefansson, U. Thorsteinsdóttir, A. R. Thurik, N. J. Timpson, H. Tiemeier, J. Y. Tung, A. G. Uitterlinden, V. Vitart, P. Vollenweider, D. R. Weir, J. F. Wilson, A. F. Wright, D. C. Conley, R. F. Krueger, G. Davey Smith, A. Hofman, D. I. Laibson, S. E. Medland, M. N. Meyer, J. Yang, M. Johannesson, P. M. Visscher, T. Esko, P. D. Koellinger, D. Cesarini, D. J. Benjamin, D. J. Benjamin; LifeLines Cohort Study, Genome-wide association study identifies 74 loci associated with educational attainment. *Nature* **533**, 539–542 (2016). [doi:10.1038/nature17671](https://doi.org/10.1038/nature17671) [Medline](#)

34. D. J. Smith, V. Escott-Price, G. Davies, M. E. S. Bailey, L. Colodro-Conde, J. Ward, A. Vedernikov, R. Marioni, B. Cullen, D. Lyall, S. P. Hagenaars, D. C. M. Liewald, M. Luciano, C. R. Gale, S. J. Ritchie, C. Hayward, B. Nicholl, B. Bulik-Sullivan, M. Adams, B. Couvy-Duchesne, N. Graham, D. Mackay, J. Evans, B. H. Smith, D. J. Porteous, S. E. Medland, N. G. Martin, P. Holmans, A. M. McIntosh, J. P. Pell, I. J. Deary, M. C. O'Donovan, Genome-wide analysis of over 106 000 individuals identifies 9 neuroticism-associated loci. *Mol. Psychiatry* **21**, 749–757 (2016). [doi:10.1038/mp.2016.49](https://doi.org/10.1038/mp.2016.49) [Medline](#)

35. P. F. Buckley, B. J. Miller, D. S. Lehrer, D. J. Castle, Psychiatric comorbidities and schizophrenia. *Schizophr. Bull.* **35**, 383–402 (2009). [doi:10.1093/schbul/sbn135](https://doi.org/10.1093/schbul/sbn135) [Medline](#)
36. C. G. Lyketsos, M. Steinberg, J. T. Tschanz, M. C. Norton, D. C. Steffens, J. C. Breitner, Mental and behavioral disturbances in dementia: Findings from the Cache County Study on Memory in Aging. *Am. J. Psychiatry* **157**, 708–714 (2000). [doi:10.1176/appi.ajp.157.5.708](https://doi.org/10.1176/appi.ajp.157.5.708) [Medline](#)
37. R. Kendell, A. Jablensky, Distinguishing between the validity and utility of psychiatric diagnoses. *Am. J. Psychiatry* **160**, 4–12 (2003). [doi:10.1176/appi.ajp.160.1.4](https://doi.org/10.1176/appi.ajp.160.1.4) [Medline](#)
38. A. S. Cristino, S. M. Williams, Z. Hawi, J.-Y. An, M. A. Bellgrove, C. E. Schwartz, Lda. F. Costa, C. Cladianos, Neurodevelopmental and neuropsychiatric disorders represent an interconnected molecular system. *Mol. Psychiatry* **19**, 294–301 (2014). [doi:10.1038/mp.2013.16](https://doi.org/10.1038/mp.2013.16) [Medline](#)
39. D. A. Regier, C. T. Kaelber, D. S. Rae, M. E. Farmer, B. Knauper, R. C. Kessler, G. S. Norquist, Limitations of diagnostic criteria and assessment instruments for mental disorders. Implications for research and policy. *Arch. Gen. Psychiatry* **55**, 109–115 (1998). [doi:10.1001/archpsyc.55.2.109](https://doi.org/10.1001/archpsyc.55.2.109) [Medline](#)
40. T. M. Laursen, E. Agerbo, C. B. Pedersen, Bipolar disorder, schizoaffective disorder, and schizophrenia overlap: A new comorbidity index. *J. Clin. Psychiatry* **70**, 1432–1438 (2009). [doi:10.4088/JCP.08m04807](https://doi.org/10.4088/JCP.08m04807) [Medline](#)
41. N. R. Wray, S. H. Lee, K. S. Kendler, Impact of diagnostic misclassification on estimation of genetic correlations using genome-wide genotypes. *Eur. J. Hum. Genet.* **20**, 668–674 (2012). [doi:10.1038/ejhg.2011.257](https://doi.org/10.1038/ejhg.2011.257) [Medline](#)
42. E. G. Willcutt, A. E. Doyle, J. T. Nigg, S. V. Faraone, B. F. Pennington, Validity of the executive function theory of attention-deficit/hyperactivity disorder: A meta-analytic review. *Biol. Psychiatry* **57**, 1336–1346 (2005). [doi:10.1016/j.biopsych.2005.02.006](https://doi.org/10.1016/j.biopsych.2005.02.006) [Medline](#)
43. J. T. Spector, S. R. Kahn, M. R. Jones, M. Jayakumar, D. Dalal, S. Nazarian, Migraine headache and ischemic stroke risk: An updated meta-analysis. *Am. J. Med.* **123**, 612–624 (2010). [doi:10.1016/j.amjmed.2009.12.021](https://doi.org/10.1016/j.amjmed.2009.12.021) [Medline](#)
44. O. B. Fasmer, A. Halmøy, K. J. Oedegaard, J. Haavik, Adult attention deficit hyperactivity disorder is associated with migraine headaches. *Eur. Arch. Psychiatry Clin. Neurosci.* **261**, 595–602 (2011). [doi:10.1007/s00406-011-0203-9](https://doi.org/10.1007/s00406-011-0203-9) [Medline](#)
45. N. Breslau, R. B. Lipton, W. F. Stewart, L. R. Schultz, K. M. Welch, Comorbidity of migraine and depression: Investigating potential etiology and prognosis. *Neurology* **60**, 1308–1312 (2003). [doi:10.1212/01.WNL.0000058907.41080.54](https://doi.org/10.1212/01.WNL.0000058907.41080.54) [Medline](#)
46. K. R. Merikangas, J. Angst, H. Isler, Migraine and psychopathology. Results of the Zurich cohort study of young adults. *Arch. Gen. Psychiatry* **47**, 849–853 (1990). [doi:10.1001/archpsyc.1990.01810210057008](https://doi.org/10.1001/archpsyc.1990.01810210057008) [Medline](#)
47. G. Barabas, W. S. Matthews, M. Ferrari, Tourette's syndrome and migraine. *Arch. Neurol.* **41**, 871–872 (1984). [doi:10.1001/archneur.1984.04050190077018](https://doi.org/10.1001/archneur.1984.04050190077018) [Medline](#)

48. R. S. McIntyre, J. Z. Konarski, K. Wilkins, B. Bouffard, J. K. Soczynska, S. H. Kennedy, The prevalence and impact of migraine headache in bipolar disorder: Results from the Canadian Community Health Survey. *Headache* **46**, 973–982 (2006). [doi:10.1111/j.1526-4610.2006.00469.x](https://doi.org/10.1111/j.1526-4610.2006.00469.x) [Medline](#)
49. M. T. Heneka, M. J. Carson, J. El Khoury, G. E. Landreth, F. Brosseron, D. L. Feinstein, A. H. Jacobs, T. Wyss-Coray, J. Vitorica, R. M. Ransohoff, K. Herrup, S. A. Frautschy, B. Finsen, G. C. Brown, A. Verkhratsky, K. Yamanaka, J. Koistinaho, E. Latz, A. Halle, G. C. Petzold, T. Town, D. Morgan, M. L. Shinohara, V. H. Perry, C. Holmes, N. G. Bazan, D. J. Brooks, S. Hunot, B. Joseph, N. Deigendesch, O. Garaschuk, E. Boddeke, C. A. Dinarello, J. C. Breitner, G. M. Cole, D. T. Golenbock, M. P. Kummer, Neuroinflammation in Alzheimer's disease. *Lancet Neurol.* **14**, 388–405 (2015). [doi:10.1016/S1474-4422\(15\)70016-5](https://doi.org/10.1016/S1474-4422(15)70016-5) [Medline](#)
50. E. C. Hirsch, S. Hunot, Neuroinflammation in Parkinson's disease: A target for neuroprotection? *Lancet Neurol.* **8**, 382–397 (2009). [doi:10.1016/S1474-4422\(09\)70062-6](https://doi.org/10.1016/S1474-4422(09)70062-6) [Medline](#)
51. E. M. Frohman, M. K. Racke, C. S. Raine, Multiple sclerosis—the plaque and its pathogenesis. *N. Engl. J. Med.* **354**, 942–955 (2006). [doi:10.1056/NEJMra052130](https://doi.org/10.1056/NEJMra052130) [Medline](#)
52. C. Waeber, M. A. Moskowitz, Migraine as an inflammatory disorder. *Neurology* **64** (Suppl 2), S9–S15 (2005). [doi:10.1212/WNL.64.10\\_suppl\\_2.S9](https://doi.org/10.1212/WNL.64.10_suppl_2.S9) [Medline](#)
53. J. Steiner, M. Walter, W. Glanz, Z. Sarnyai, H.-G. Bernstein, S. Vielhaber, A. Kästner, M. Skalej, W. Jordan, K. Schiltz, C. Klingbeil, K.-P. Wandinger, B. Bogerts, W. Stoecker, Increased prevalence of diverse N-methyl-D-aspartate glutamate receptor antibodies in patients with an initial diagnosis of schizophrenia: Specific relevance of IgG NR1a antibodies for distinction from N-methyl-D-aspartate glutamate receptor encephalitis. *JAMA Psychiatry* **70**, 271–278 (2013). [doi:10.1001/2013.jamapsychiatry.86](https://doi.org/10.1001/2013.jamapsychiatry.86) [Medline](#)
54. L. Jones, J.-C. Lambert, L.-S. Wang, S.-H. Choi, D. Harold, A. Vedernikov, V. Escott-Price, T. Stone, A. Richards, C. Bellenguez, C. A. Ibrahim-Verbaas, A. C. Naj, R. Sims, A. Gerrish, G. Jun, A. L. DeStefano, J. C. Bis, G. W. Beecham, B. Grenier-Boley, G. Russo, T. A. Thornton-Wells, N. Jones, A. V. Smith, V. Chouraki, C. Thomas, M. A. Ikram, D. Zelenika, B. N. Vardarajan, Y. Kamatani, C.-F. Lin, H. Schmidt, B. W. Kunkle, M. L. Dunstan, A. Ruiz, M.-T. Bihoreau, C. Reitz, F. Pasquier, P. Hollingworth, O. Hanon, A. L. Fitzpatrick, J. D. Buxbaum, D. Champion, P. K. Crane, T. Becker, V. Gudnason, C. Cruchaga, D. Craig, N. Amin, C. Berr, O. L. Lopez, P. L. De Jager, V. Deramecourt, J. A. Johnston, D. Evans, S. Lovestone, L. Letteneur, J. Kornhuber, L. Tárrega, D. C. Rubinsztein, G. Eiriksdottir, K. Sleegers, A. M. Goate, N. Fiévet, M. J. Huentelman, M. Gill, V. Emilsson, K. Brown, M. I. Kamboh, L. Keller, P. Barberger-Gateau, B. McGuinness, E. B. Larson, A. J. Myers, C. Dufouil, S. Todd, D. Wallon, S. Love, P. Kehoe, E. Rogaeva, J. Gallacher, P. St George-Hyslop, J. Clarimon, A. Lleò, A. Bayer, D. W. Tsuang, L. Yu, M. Tsolaki, P. Bossù, G. Spalletta, P. Proitsi, J. Collinge, S. Sorbi, F. Sanchez Garcia, N. Fox, J. Hardy, M. C. Deniz Naranjo, C. Razquin, P. Bosco, R. Clarke, C. Brayne, D. Galimberti, M. Mancuso, S. Moebus, P. Mecocci, M. del Zompo, W. Maier, H. Hampel, A. Pilotto, M. Bullido, F. Panza, P. Caffarra, B. Nacmias, J. R. Gilbert, M. Mayhaus, F. Jessen, M. Dichgans, L. Lannfelt, H. Hakonarson, S. Pichler, M.

- M. Carrasquillo, M. Ingelsson, D. Beekly, V. Alavarez, F. Zou, O. Valladares, S. G. Younkin, E. Coto, K. L. Hamilton-Nelson, I. Mateo, M. J. Owen, K. M. Faber, P. V. Jonsson, O. Combarros, M. C. O'Donovan, L. B. Cantwell, H. Soininen, D. Blacker, S. Mead, T. H. Mosley Jr., D. A. Bennett, T. B. Harris, L. Fratiglioni, C. Holmes, R. F. A. G. de Bruijn, P. Passmore, T. J. Montine, K. Bettens, J. I. Rotter, A. Brice, K. Morgan, T. M. Foroud, W. A. Kukull, D. Hannequin, J. F. Powell, M. A. Nalls, K. Ritchie, K. L. Lunetta, J. S. K. Kauwe, E. Boerwinkle, M. Riemenschneider, M. Boada, M. Hiltunen, E. R. Martin, P. Pastor, R. Schmidt, D. Rujescu, J.-F. Dartigues, R. Mayeux, C. Tzourio, A. Hofman, M. M. Nöthen, C. Graff, B. M. Psaty, J. L. Haines, M. Lathrop, M. A. Pericak-Vance, L. J. Launer, L. A. Farrer, C. M. van Duijn, C. Van Broeckhoven, A. Ramirez, G. D. Schellenberg, S. Seshadri, P. Amouyel, J. Williams, P. A. Holmans; International Genomics of Alzheimer's Disease Consortium (IGAP), Convergent genetic and expression data implicate immunity in Alzheimer's disease. *Alzheimers Dement.* **11**, 658–671 (2015). [doi:10.1016/j.jalz.2014.05.1757](https://doi.org/10.1016/j.jalz.2014.05.1757) [Medline](#)
55. M. H. M. de Moor, S. M. van den Berg, K. J. H. Verweij, R. F. Krueger, M. Luciano, A. Arias Vasquez, L. K. Matteson, J. Derringer, T. Esko, N. Amin, S. D. Gordon, N. K. Hansell, A. B. Hart, I. Seppälä, J. E. Huffman, B. Konte, J. Lahti, M. Lee, M. Miller, T. Nutile, T. Tanaka, A. Teumer, A. Viktorin, J. Wedenoja, G. R. Abecasis, D. E. Adkins, A. Agrawal, J. Allik, K. Appel, T. B. Bigdeli, F. Busonero, H. Campbell, P. T. Costa, G. Davey Smith, G. Davies, H. de Wit, J. Ding, B. E. Engelhardt, J. G. Eriksson, I. O. Fedko, L. Ferrucci, B. Franke, I. Giegling, R. Grucza, A. M. Hartmann, A. C. Heath, K. Heinonen, A. K. Henders, G. Homuth, J.-J. Hottenga, W. G. Iacono, J. Janzing, M. Jokela, R. Karlsson, J. P. Kemp, M. G. Kirkpatrick, A. Latvala, T. Lehtimäki, D. C. Liewald, P. A. F. Madden, C. Magri, P. K. E. Magnusson, J. Marten, A. Maschio, S. E. Medland, E. Mihailov, Y. Milaneschi, G. W. Montgomery, M. Nauck, K. G. Ouwens, A. Palotie, E. Pettersson, O. Polasek, Y. Qian, L. Pulkki-Råback, O. T. Raitakari, A. Realo, R. J. Rose, D. Ruggiero, C. O. Schmidt, W. S. Slutske, R. Sorice, J. M. Starr, B. St Pourcain, A. R. Sutin, N. J. Timpson, H. Trochet, S. Vermeulen, E. Vuoksima, E. Widen, J. Wouda, M. J. Wright, L. Zgaga, D. Porteous, A. Minelli, A. A. Palmer, D. Rujescu, M. Ciullo, C. Hayward, I. Rudan, A. Metspalu, J. Kaprio, I. J. Deary, K. Rääkkönen, J. F. Wilson, L. Keltikangas-Järvinen, L. J. Bierut, J. M. Hettema, H. J. Grabe, C. M. van Duijn, D. M. Evans, D. Schlessinger, N. L. Pedersen, A. Terracciano, M. McGue, B. W. J. H. Penninx, N. G. Martin, D. I. Boomsma; Genetics of Personality Consortium, Meta-analysis of Genome-wide Association Studies for Neuroticism, and the Polygenic Association With Major Depressive Disorder. *JAMA Psychiatry* **72**, 642–650 (2015). [doi:10.1001/jamapsychiatry.2015.0554](https://doi.org/10.1001/jamapsychiatry.2015.0554) [Medline](#)
56. K. S. Kendler, M. Gatz, C. O. Gardner, N. L. Pedersen, Personality and major depression: A Swedish longitudinal, population-based twin study. *Arch. Gen. Psychiatry* **63**, 1113–1120 (2006). [doi:10.1001/archpsyc.63.10.1113](https://doi.org/10.1001/archpsyc.63.10.1113) [Medline](#)
57. R. E. Ørstavik, K. S. Kendler, N. Czajkowski, K. Tambs, T. Reichborn-Kjennerud, The relationship between depressive personality disorder and major depressive disorder: A population-based twin study. *Am. J. Psychiatry* **164**, 1866–1872 (2007). [doi:10.1176/appi.ajp.2007.07010045](https://doi.org/10.1176/appi.ajp.2007.07010045) [Medline](#)

58. H. Hemingway, M. Marmot, Evidence based cardiology: Psychosocial factors in the aetiology and prognosis of coronary heart disease. Systematic review of prospective cohort studies. *BMJ* **318**, 1460–1467 (1999). [doi:10.1136/bmj.318.7196.1460](https://doi.org/10.1136/bmj.318.7196.1460) [Medline](#)
59. F. J. McClermon, S. H. Kollins, ADHD and smoking: From genes to brain to behavior. *Ann. N. Y. Acad. Sci.* **1141**, 131–147 (2008). [doi:10.1196/annals.1441.016](https://doi.org/10.1196/annals.1441.016) [Medline](#)
60. T. Korhonen, E. Levälähti, D. M. Dick, L. Pulkkinen, R. J. Rose, J. Kaprio, A. C. Huizink, Externalizing behaviors and cigarette smoking as predictors for use of illicit drugs: A longitudinal study among Finnish adolescent twins. *Twin Res. Hum. Genet.* **13**, 550–558 (2010). [doi:10.1375/twin.13.6.550](https://doi.org/10.1375/twin.13.6.550) [Medline](#)
61. D. A. Snowdon, S. J. Kemper, J. A. Mortimer, L. H. Greiner, D. R. Wekstein, W. R. Markesbery, Linguistic ability in early life and cognitive function and Alzheimer's disease in late life. Findings from the Nun Study. *JAMA* **275**, 528–532 (1996). [doi:10.1001/jama.1996.03530310034029](https://doi.org/10.1001/jama.1996.03530310034029) [Medline](#)
62. S. Cortese, C. R. Moreira-Maia, D. St Fleur, C. Morcillo-Peñalver, L. A. Rohde, S. V. Faraone, Association Between ADHD and Obesity: A Systematic Review and Meta-Analysis. *Am. J. Psychiatry* **173**, 34–43 (2016). [doi:10.1176/appi.ajp.2015.15020266](https://doi.org/10.1176/appi.ajp.2015.15020266) [Medline](#)
63. A. E. Locke, B. Kahali, S. I. Berndt, A. E. Justice, T. H. Pers, F. R. Day, C. Powell, S. Vedantam, M. L. Buchkovich, J. Yang, D. C. Croteau-Chonka, T. Esko, T. Fall, T. Ferreira, S. Gustafsson, Z. Kutalik, J. Luan, R. Mägi, J. C. Randall, T. W. Winkler, A. R. Wood, T. Workalemahu, J. D. Faul, J. A. Smith, J. H. Zhao, W. Zhao, J. Chen, R. Fehrmann, Å. K. Hedman, J. Karjalainen, E. M. Schmidt, D. Absher, N. Amin, D. Anderson, M. Beekman, J. L. Bolton, J. L. Bragg-Gresham, S. Buyske, A. Demirkan, G. Deng, G. B. Ehret, B. Feenstra, M. F. Feitosa, K. Fischer, A. Goel, J. Gong, A. U. Jackson, S. Kanoni, M. E. Kleber, K. Kristiansson, U. Lim, V. Lotay, M. Mangino, I. M. Leach, C. Medina-Gomez, S. E. Medland, M. A. Nalls, C. D. Palmer, D. Pasko, S. Pechlivanis, M. J. Peters, I. Prokopenko, D. Shungin, A. Stančáková, R. J. Strawbridge, Y. J. Sung, T. Tanaka, A. Teumer, S. Trompet, S. W. van der Laan, J. van Setten, J. V. Van Vliet-Ostaptchouk, Z. Wang, L. Yengo, W. Zhang, A. Isaacs, E. Albrecht, J. Ärnlöv, G. M. Arscott, A. P. Attwood, S. Bandinelli, A. Barrett, I. N. Bas, C. Bellis, A. J. Bennett, C. Berne, R. Blagieva, M. Blüher, S. Böhringer, L. L. Bonnycastle, Y. Böttcher, H. A. Boyd, M. Bruinenberg, I. H. Caspersen, Y. I. Chen, R. Clarke, E. W. Daw, A. J. M. de Craen, G. Delgado, M. Dimitriou, A. S. F. Doney, N. Eklund, K. Estrada, E. Eury, L. Folkersen, R. M. Fraser, M. E. Garcia, F. Geller, V. Giedraitis, B. Gigante, A. S. Go, A. Golay, A. H. Goodall, S. D. Gordon, M. Gorski, H.-J. Grabe, H. Grallert, T. B. Grammer, J. Gräßler, H. Grönberg, C. J. Groves, G. Gusto, J. Haessler, P. Hall, T. Haller, G. Hallmans, C. A. Hartman, M. Hassinen, C. Hayward, N. L. Heard-Costa, Q. Helmer, C. Hengstenberg, O. Holmen, J.-J. Hottenga, A. L. James, J. M. Jeff, Å. Johansson, J. Jolley, T. Juliusdottir, L. Kinnunen, W. Koenig, M. Koskenvuo, W. Kratzer, J. Laitinen, C. Lamina, K. Leander, N. R. Lee, P. Lichtner, L. Lind, J. Lindström, K. S. Lo, S. Lobbens, R. Lorbeer, Y. Lu, F. Mach, P. K. E. Magnusson, A. Mahajan, W. L. McArdle, S. McLachlan, C. Menni, S. Merger, E. Mihailov, L. Milani, A. Moayyeri, K. L. Monda, M. A. Morken, A. Mulas, G. Müller, M. Müller-Nurasyid, A. W. Musk, R. Nagaraja, M. M. Nöthen, I. M. Nolte, S. Pilz, N. W. Rayner, F. Renstrom, R. Rettig, J. S. Ried, S. Ripke,

N. R. Robertson, L. M. Rose, S. Sanna, H. Scharnagl, S. Scholtens, F. R. Schumacher, W. R. Scott, T. Seufferlein, J. Shi, A. V. Smith, J. Smolonska, A. V. Stanton, V. Steinhorsdottir, K. Stirrups, H. M. Stringham, J. Sundström, M. A. Swertz, A. J. Swift, A.-C. Syvänen, S.-T. Tan, B. O. Tayo, B. Thorand, G. Thorleifsson, J. P. Tyrer, H.-W. Uh, L. Vandenput, F. C. Verhulst, S. H. Vermeulen, N. Verweij, J. M. Vonk, L. L. Waite, H. R. Warren, D. Waterworth, M. N. Weedon, L. R. Wilkens, C. Willenborg, T. Wilsgaard, M. K. Wojczynski, A. Wong, A. F. Wright, Q. Zhang, E. P. Brennan, M. Choi, Z. Dastani, A. W. Drong, P. Eriksson, A. Franco-Cereceda, J. R. Gådin, A. G. Gharavi, M. E. Goddard, R. E. Handsaker, J. Huang, F. Karpe, S. Kathiresan, S. Keildson, K. Kiryluk, M. Kubo, J.-Y. Lee, L. Liang, R. P. Lifton, B. Ma, S. A. McCarroll, A. J. McKnight, J. L. Min, M. F. Moffatt, G. W. Montgomery, J. M. Murabito, G. Nicholson, D. R. Nyholt, Y. Okada, J. R. B. Perry, R. Dorajoo, E. Reinmaa, R. M. Salem, N. Sandholm, R. A. Scott, L. Stolk, A. Takahashi, T. Tanaka, F. M. van 't Hooft, A. A. E. Vinkhuyzen, H.-J. Westra, W. Zheng, K. T. Zondervan, A. C. Heath, D. Arveiler, S. J. L. Bakker, J. Beilby, R. N. Bergman, J. Blangero, P. Bovet, H. Campbell, M. J. Caulfield, G. Cesana, A. Chakravarti, D. I. Chasman, P. S. Chines, F. S. Collins, D. C. Crawford, L. A. Cupples, D. Cusi, J. Danesh, U. de Faire, H. M. den Ruijter, A. F. Dominiczak, R. Erbel, J. Erdmann, J. G. Eriksson, M. Farrall, S. B. Felix, E. Ferrannini, J. Ferrières, I. Ford, N. G. Forouhi, T. Forrester, O. H. Franco, R. T. Gansevoort, P. V. Gejman, C. Gieger, O. Gottesman, V. Gudnason, U. Gyllensten, A. S. Hall, T. B. Harris, A. T. Hattersley, A. A. Hicks, L. A. Hindorf, A. D. Hingorani, A. Hofman, G. Homuth, G. K. Hovingh, S. E. Humphries, S. C. Hunt, E. Hyppönen, T. Illig, K. B. Jacobs, M.-R. Jarvelin, K.-H. Jöckel, B. Johansen, P. Jousilahti, J. W. Jukema, A. M. Jula, J. Kaprio, J. J. P. Kastelein, S. M. Keinanen-Kiukaanniemi, L. A. Kiemeny, P. Knekt, J. S. Kooner, C. Kooperberg, P. Kovacs, A. T. Kraja, M. Kumari, J. Kuusisto, T. A. Lakka, C. Langenberg, L. L. Marchand, T. Lehtimäki, V. Lyssenko, S. Männistö, A. Marette, T. C. Matise, C. A. McKenzie, B. McKnight, F. L. Moll, A. D. Morris, A. P. Morris, J. C. Murray, M. Nelis, C. Ohlsson, A. J. Oldehinkel, K. K. Ong, P. A. F. Madden, G. Pasterkamp, J. F. Peden, A. Peters, D. S. Postma, P. P. Pramstaller, J. F. Price, L. Qi, O. T. Raitakari, T. Rankinen, D. C. Rao, T. K. Rice, P. M. Ridker, J. D. Rioux, M. D. Ritchie, I. Rudan, V. Salomaa, N. J. Samani, J. Saramies, M. A. Sarzynski, H. Schunkert, P. E. H. Schwarz, P. Sever, A. R. Shuldiner, J. Sinisalo, R. P. Stolk, K. Strauch, A. Tönjes, D.-A. Trégouët, A. Tremblay, E. Tremoli, J. Virtamo, M.-C. Vohl, U. Völker, G. Waeber, G. Willemsen, J. C. Witteman, M. C. Zillikens, L. S. Adair, P. Amouyel, F. W. Asselbergs, T. L. Assimes, M. Bochud, B. O. Boehm, E. Boerwinkle, S. R. Bornstein, E. P. Bottinger, C. Bouchard, S. Cauchi, J. C. Chambers, S. J. Chanock, R. S. Cooper, P. I. W. de Bakker, G. Dedoussis, L. Ferrucci, P. W. Franks, P. Froguel, L. C. Groop, C. A. Haiman, A. Hamsten, J. Hui, D. J. Hunter, K. Hveem, R. C. Kaplan, M. Kivimaki, D. Kuh, M. Laakso, Y. Liu, N. G. Martin, W. März, M. Melbye, A. Metspalu, S. Moebus, P. B. Munroe, I. Njølstad, B. A. Oostra, C. N. A. Palmer, N. L. Pedersen, M. Perola, L. Pérusse, U. Peters, C. Power, T. Quertermous, R. Rauramaa, F. Rivadeneira, T. E. Saaristo, D. Saleheen, N. Sattar, E. E. Schadt, D. Schlessinger, P. E. Slagboom, H. Snieder, T. D. Spector, U. Thorsteinsdottir, M. Stumvoll, J. Tuomilehto, A. G. Uitterlinden, M. Uusitupa, P. van der Harst, M. Walker, H. Wallaschofski, N. J. Wareham, H. Watkins, D. R. Weir, H.-E. Wichmann, J. F. Wilson, P. Zanen, I. B. Borecki, P. Deloukas, C. S. Fox, I. M. Heid, J. R. O'Connell, D. P. Strachan, K.



- Stefansson, C. M. van Duijn, G. R. Abecasis, L. Franke, T. M. Frayling, M. I. McCarthy, P. M. Visscher, A. Scherag, C. J. Willer, M. Boehnke, K. L. Mohlke, C. M. Lindgren, J. S. Beckmann, I. Barroso, K. E. North, E. Ingelsson, J. N. Hirschhorn, R. J. F. Loos, E. K. Speliotes; LifeLines Cohort Study; ADIPOGen Consortium; AGEN-BMI Working Group; CARDIOGRAMplusC4D Consortium; CKDGen Consortium; GLGC; ICBP; MAGIC Investigators; MuTHER Consortium; MIGen Consortium; PAGE Consortium; ReproGen Consortium; GENIE Consortium; International Endogene Consortium, Genetic studies of body mass index yield new insights for obesity biology. *Nature* **518**, 197–206 (2015). [doi:10.1038/nature14177](https://doi.org/10.1038/nature14177) [Medline](#)
64. L. Mustelin, A. Raevuori, C. M. Bulik, A. Rissanen, H. W. Hoek, J. Kaprio, A. Keski-Rahkonen, Long-term outcome in anorexia nervosa in the community. *Int. J. Eat. Disord.* **48**, 851–859 (2015). [doi:10.1002/eat.22415](https://doi.org/10.1002/eat.22415) [Medline](#)
65. T. Kurth, J. M. Gaziano, K. M. Rexrode, C. S. Kase, N. R. Cook, J. E. Manson, J. E. Buring, Prospective study of body mass index and risk of stroke in apparently healthy women. *Circulation* **111**, 1992–1998 (2005). [doi:10.1161/01.CIR.0000161822.83163.B6](https://doi.org/10.1161/01.CIR.0000161822.83163.B6) [Medline](#)
66. S. R. Korndörfer, A. R. Lucas, V. J. Suman, C. S. Crowson, L. E. Krahn, L. J. Melton III, Long-term survival of patients with anorexia nervosa: A population-based study in Rochester, Minn. *Mayo Clin. Proc.* **78**, 278–284 (2003). [doi:10.4065/78.3.278](https://doi.org/10.4065/78.3.278) [Medline](#)
67. P. F. Sullivan, Discrepant results regarding long-term survival of patients with anorexia nervosa? *Mayo Clin. Proc.* **78**, 273–274 (2003). [doi:10.4065/78.3.273](https://doi.org/10.4065/78.3.273) [Medline](#)
68. L. Duncan, Z. Yilmaz, H. Gaspar, R. Walters, J. Goldstein, V. Anttila, B. Bulik-Sullivan, S. Ripke, L. Thornton, A. Hinney, M. Daly, P. F. Sullivan, E. Zeggini, G. Breen, C. M. Bulik; Eating Disorders Working Group of the Psychiatric Genomics Consortium, Significant Locus and Metabolic Genetic Correlations Revealed in Genome-Wide Association Study of Anorexia Nervosa. *Am. J. Psychiatry* **174**, 850–858 (2017). [doi:10.1176/appi.ajp.2017.16121402](https://doi.org/10.1176/appi.ajp.2017.16121402) [Medline](#)
69. T. Otowa, K. Hek, M. Lee, E. M. Byrne, S. S. Mirza, M. G. Nivard, T. Bigdeli, S. H. Aggen, D. Adkins, A. Wolen, A. Fanous, M. C. Keller, E. Castelao, Z. Kutalik, S. Van der Auwera, G. Homuth, M. Nauck, A. Teumer, Y. Milaneschi, J.-J. Hottenga, N. Direk, A. Hofman, A. Uitterlinden, C. L. Mulder, A. K. Henders, S. E. Medland, S. Gordon, A. C. Heath, P. A. F. Madden, M. L. Pergadia, P. J. van der Most, I. M. Nolte, F. V. A. van Oort, C. A. Hartman, A. J. Oldehinkel, M. Preisig, H. J. Grabe, C. M. Middeldorp, B. W. J. H. Penninx, D. Boomsma, N. G. Martin, G. Montgomery, B. S. Maher, E. J. van den Oord, N. R. Wray, H. Tiemeier, J. M. Hettema, Meta-analysis of genome-wide association studies of anxiety disorders. *Mol. Psychiatry* **21**, 1391–1399 (2016). [doi:10.1038/mp.2015.197](https://doi.org/10.1038/mp.2015.197) [Medline](#)
70. Autism Spectrum Disorders Working Group of The Psychiatric Genomics Consortium, Meta-analysis of GWAS of over 16,000 individuals with autism spectrum disorder highlights a novel locus at 10q24.32 and a significant overlap with schizophrenia. *Mol. Autism* **8**, 21 (2017). [doi:10.1186/s13229-017-0137-9](https://doi.org/10.1186/s13229-017-0137-9) [Medline](#)
71. International League Against Epilepsy Consortium on Complex Epilepsies, Genetic determinants of common epilepsies: A meta-analysis of genome-wide association studies. *Lancet Neurol.* **13**, 893–903 (2014). [doi:10.1016/S1474-4422\(14\)70171-1](https://doi.org/10.1016/S1474-4422(14)70171-1) [Medline](#)

72. D. Woo, G. J. Falcone, W. J. Devan, W. M. Brown, A. Biffi, T. D. Howard, C. D. Anderson, H. B. Brouwers, V. Valant, T. W. K. Battey, F. Radmanesh, M. R. Raffeld, S. Baedorf-Kassis, R. Deka, J. G. Woo, L. J. Martin, M. Haverbusch, C. J. Moomaw, G. Sun, J. P. Broderick, M. L. Flaherty, S. R. Martini, D. O. Kleindorfer, B. Kissela, M. E. Comeau, J. M. Jagiella, H. Schmidt, P. Freudenberger, A. Pichler, C. Enzinger, B. M. Hansen, B. Norrving, J. Jimenez-Conde, E. Giralt-Steinhauer, R. Elosua, E. Cuadrado-Godia, C. Soriano, J. Roquer, P. Kraft, A. M. Ayres, K. Schwab, J. L. McCauley, J. Pera, A. Urbanik, N. S. Rost, J. N. Goldstein, A. Viswanathan, E.-M. Stögerer, D. L. Tirschwell, M. Selim, D. L. Brown, S. L. Silliman, B. B. Worrall, J. F. Meschia, C. S. Kidwell, J. Montaner, I. Fernandez-Cadenas, P. Delgado, R. Malik, M. Dichgans, S. M. Greenberg, P. M. Rothwell, A. Lindgren, A. Slowik, R. Schmidt, C. D. Langefeld, J. Rosand; International Stroke Genetics Consortium, Meta-analysis of genome-wide association studies identifies 1q22 as a susceptibility locus for intracerebral hemorrhage. *Am. J. Hum. Genet.* **94**, 511–521 (2014). [doi:10.1016/j.ajhg.2014.02.012](https://doi.org/10.1016/j.ajhg.2014.02.012) [Medline](#)
73. M. Traylor, M. Farrall, E. G. Holliday, C. Sudlow, J. C. Hopewell, Y.-C. Cheng, M. Fornage, M. A. Ikram, R. Malik, S. Bevan, U. Thorsteinsdottir, M. A. Nalls, W. Longstreth, K. L. Wiggins, S. Yadav, E. A. Parati, A. L. Destefano, B. B. Worrall, S. J. Kittner, M. S. Khan, A. P. Reiner, A. Helgadottir, S. Achterberg, I. Fernandez-Cadenas, S. Abboud, R. Schmidt, M. Walters, W.-M. Chen, E. B. Ringelstein, M. O'Donnell, W. K. Ho, J. Pera, R. Lemmens, B. Norrving, P. Higgins, M. Benn, M. Sale, G. Kuhlenbäumer, A. S. F. Doney, A. M. Vicente, H. Delavaran, A. Algra, G. Davies, S. A. Oliveira, C. N. A. Palmer, I. Deary, H. Schmidt, M. Pandolfo, J. Montaner, C. Carty, P. I. W. de Bakker, K. Kostulas, J. M. Ferro, N. R. van Zuydam, E. Valdimarsson, B. G. Nordestgaard, A. Lindgren, V. Thijs, A. Slowik, D. Saleheen, G. Paré, K. Berger, G. Thorleifsson, A. Hofman, T. H. Mosley, B. D. Mitchell, K. Furie, R. Clarke, C. Levi, S. Seshadri, A. Gschwendtner, G. B. Boncoraglio, P. Sharma, J. C. Bis, S. Gretarsdottir, B. M. Psaty, P. M. Rothwell, J. Rosand, J. F. Meschia, K. Stefansson, M. Dichgans, H. S. Markus; Australian Stroke Genetics Collaborative, Wellcome Trust Case Control Consortium 2 (WTCCC2); International Stroke Genetics Consortium, Genetic risk factors for ischaemic stroke and its subtypes (the METASTROKE collaboration): A meta-analysis of genome-wide association studies. *Lancet Neurol.* **11**, 951–962 (2012). [doi:10.1016/S1474-4422\(12\)70234-X](https://doi.org/10.1016/S1474-4422(12)70234-X) [Medline](#)
74. N. A. Patsopoulos, F. Esposito, J. Reischl, S. Lehr, D. Bauer, J. Heubach, R. Sandbrink, C. Pohl, G. Edan, L. Kappos, D. Miller, J. Montalbán, C. H. Polman, M. S. Freedman, H. P. Hartung, B. G. Arnason, G. Comi, S. Cook, M. Filippi, D. S. Goodin, D. Jeffery, P. O'Connor, G. C. Ebers, D. Langdon, A. T. Reder, A. Traboulsee, F. Zipp, S. Schimrigk, J. Hillert, M. Bahlo, D. R. Booth, S. Broadley, M. A. Brown, B. L. Browning, S. R. Browning, H. Butzkueven, W. M. Carroll, C. Chapman, S. J. Foote, L. Griffiths, A. G. Kermodé, T. J. Kilpatrick, J. Lechner-Scott, M. Marriott, D. Mason, P. Moscato, R. N. Heard, M. P. Pender, V. M. Perreau, D. Perera, J. P. Rubio, R. J. Scott, M. Slee, J. Stankovich, G. J. Stewart, B. V. Taylor, N. Tubridy, E. Willoughby, J. Wiley, P. Matthews, F. M. Boneschi, A. Compston, J. Haines, S. L. Hauser, J. McCauley, A. Iverson, J. R. Oksenberg, M. Pericak-Vance, S. J. Sawcer, P. L. De Jager, D. A. Hafler, P. I. de Bakker; Bayer Pharma MS Genetics Working Group; Steering Committees of Studies Evaluating IFN $\beta$ -1b and a CCR1-Antagonist; ANZgene Consortium; GeneMSA; International Multiple Sclerosis Genetics Consortium, Genome-wide meta-analysis

identifies novel multiple sclerosis susceptibility loci. *Ann. Neurol.* **70**, 897–912 (2011).  
[doi:10.1002/ana.22609](https://doi.org/10.1002/ana.22609) [Medline](#)

75. C. A. Rietveld, S. E. Medland, J. Derringer, J. Yang, T. Esko, N. W. Martin, H.-J. Westra, K. Shakhbazov, A. Abdellaoui, A. Agrawal, E. Albrecht, B. Z. Alizadeh, N. Amin, J. Barnard, S. E. Baumeister, K. S. Benke, L. F. Bielak, J. A. Boatman, P. A. Boyle, G. Davies, C. de Leeuw, N. Eklund, D. S. Evans, R. Ferhmann, K. Fischer, C. Gieger, H. K. Gjessing, S. Hägg, J. R. Harris, C. Hayward, C. Holzapfel, C. A. Ibrahim-Verbaas, E. Ingelsson, B. Jacobsson, P. K. Joshi, A. Jugessur, M. Kaakinen, S. Kanoni, J. Karjalainen, I. Kolcic, K. Kristiansson, Z. Kutalik, J. Lahti, S. H. Lee, P. Lin, P. A. Lind, Y. Liu, K. Lohman, M. Loitfelder, G. McMahon, P. M. Vidal, O. Meirelles, L. Milani, R. Myhre, M.-L. Nuotio, C. J. Oldmeadow, K. E. Petrovic, W. J. Peyrot, O. Polasek, L. Quaye, E. Reinmaa, J. P. Rice, T. S. Rizzi, H. Schmidt, R. Schmidt, A. V. Smith, J. A. Smith, T. Tanaka, A. Terracciano, M. J. H. M. van der Loos, V. Vitart, H. Völzke, J. Wellmann, L. Yu, W. Zhao, J. Allik, J. R. Attia, S. Bandinelli, F. Bastardot, J. Beauchamp, D. A. Bennett, K. Berger, L. J. Bierut, D. I. Boomsma, U. Bültmann, H. Campbell, C. F. Chabris, L. Cherkas, M. K. Chung, F. Cucca, M. de Andrade, P. L. De Jager, J.-E. De Neve, I. J. Deary, G. V. Dedoussis, P. Deloukas, M. Dimitriou, G. Eiríksdóttir, M. F. Elderson, J. G. Eriksson, D. M. Evans, J. D. Faul, L. Ferrucci, M. E. Garcia, H. Grönberg, V. Guðnason, P. Hall, J. M. Harris, T. B. Harris, N. D. Hastie, A. C. Heath, D. G. Hernandez, W. Hoffmann, A. Hofman, R. Holle, E. G. Holliday, J.-J. Hottenga, W. G. Iacono, T. Illig, M.-R. Jarvelin, M. Kähönen, J. Kaprio, R. M. Kirkpatrick, M. Kowgier, A. Latvala, L. J. Launer, D. A. Lawlor, T. Lehtimäki, J. Li, P. Lichtenstein, P. Lichtner, D. C. Liewald, P. A. Madden, P. K. E. Magnusson, T. E. Mäkinen, M. Masala, M. McGue, A. Metspalu, A. Mielck, M. B. Miller, G. W. Montgomery, S. Mukherjee, D. R. Nyholt, B. A. Oostra, L. J. Palmer, A. Palotie, B. W. J. H. Penninx, M. Perola, P. A. Peyser, M. Preisig, K. Räikkönen, O. T. Raitakari, A. Realo, S. M. Ring, S. Ripatti, F. Rivadeneira, I. Rudan, A. Rustichini, V. Salomaa, A.-P. Sarin, D. Schlessinger, R. J. Scott, H. Snieder, B. St Pourcain, J. M. Starr, J. H. Sul, I. Surakka, R. Svento, A. Teumer, H. Tiemeier, F. J. A. van Rooij, D. R. Van Wagoner, E. Vartiainen, J. Viikari, P. Vollenweider, J. M. Vonk, G. Waeber, D. R. Weir, H.-E. Wichmann, E. Widen, G. Willemsen, J. F. Wilson, A. F. Wright, D. Conley, G. Davey-Smith, L. Franke, P. J. F. Groenen, A. Hofman, M. Johannesson, S. L. R. Kardina, R. F. Krueger, D. Laibson, N. G. Martin, M. N. Meyer, D. Posthuma, A. R. Thurik, N. J. Timpson, A. G. Uitterlinden, C. M. van Duijn, P. M. Visscher, D. J. Benjamin, D. Cesarini, P. D. Koellinger; LifeLines Cohort Study, GWAS of 126,559 individuals identifies genetic variants associated with educational attainment. *Science* **340**, 1467–1471 (2013). [doi:10.1126/science.1235488](https://doi.org/10.1126/science.1235488) [Medline](#)
76. B. Benjamin, B. Pourcain, O. S. Davis, G. Davies, N. K. Hansell, M.-J. A. Brion, R. M. Kirkpatrick, R. A. M. Cents, S. Franić, M. B. Miller, C. M. A. Haworth, E. Meaburn, T. S. Price, D. M. Evans, N. Timpson, J. Kemp, S. Ring, W. McArdle, S. E. Medland, J. Yang, S. E. Harris, D. C. Liewald, P. Scheet, X. Xiao, J. J. Hudziak, E. J. C. de Geus, V. W. V. Jaddoe, J. M. Starr, F. C. Verhulst, C. Pennell, H. Tiemeier, W. G. Iacono, L. J. Palmer, G. W. Montgomery, N. G. Martin, D. I. Boomsma, D. Posthuma, M. McGue, M. J. Wright, G. Davey Smith, I. J. Deary, R. Plomin, P. M. Visscher; Wellcome Trust Case Control Consortium 2 (WTCCC2), Childhood intelligence is heritable, highly polygenic

and associated with FBNP1L. *Mol. Psychiatry* **19**, 253–258 (2014).  
[doi:10.1038/mp.2012.184](https://doi.org/10.1038/mp.2012.184) [Medline](#)

77. S. Sniekers, S. Stringer, K. Watanabe, P. R. Jansen, J. R. I. Coleman, E. Krapohl, E. Taskesen, A. R. Hammerschlag, A. Okbay, D. Zabaneh, N. Amin, G. Breen, D. Cesarini, C. F. Chabris, W. G. Iacono, M. A. Ikram, M. Johannesson, P. Koellinger, J. J. Lee, P. K. E. Magnusson, M. McGue, M. B. Miller, W. E. R. Ollier, A. Payton, N. Pendleton, R. Plomin, C. A. Rietveld, H. Tiemeier, C. M. van Duijn, D. Posthuma, Genome-wide association meta-analysis of 78,308 individuals identifies new loci and genes influencing human intelligence. *Nat. Genet.* **49**, 1107–1112 (2017). [doi:10.1038/ng.3869](https://doi.org/10.1038/ng.3869) [Medline](#)
78. A. Okbay, B. M. L. Baselmans, J.-E. De Neve, P. Turley, M. G. Nivard, M. A. Fontana, S. F. W. Meddens, R. K. Linnér, C. A. Rietveld, J. Derringer, J. Gratten, J. J. Lee, J. Z. Liu, R. de Vlaming, T. S. Ahluwalia, J. Buchwald, A. Cavadino, A. C. Frazier-Wood, N. A. Furlotte, V. Garfield, M. H. Geisel, J. R. Gonzalez, S. Haitjema, R. Karlsson, S. W. van der Laan, K.-H. Ladwig, J. Lahti, S. J. van der Lee, P. A. Lind, T. Liu, L. Matteson, E. Mihailov, M. B. Miller, C. C. Minica, I. M. Nolte, D. Mook-Kanamori, P. J. van der Most, C. Oldmeadow, Y. Qian, O. Raitakari, R. Rawal, A. Realo, R. Rueedi, B. Schmidt, A. V. Smith, E. Stergiakouli, T. Tanaka, K. Taylor, G. Thorleifsson, J. Wedenoja, J. Wellmann, H.-J. Westra, S. M. Willems, W. Zhao, N. Amin, A. Bakshi, S. Bergmann, G. Bjornsdottir, P. A. Boyle, S. Cherny, S. R. Cox, G. Davies, O. S. P. Davis, J. Ding, N. Direk, P. Eibich, R. T. Emeny, G. Fatemifar, J. D. Faul, L. Ferrucci, A. J. Forstner, C. Gieger, R. Gupta, T. B. Harris, J. M. Harris, E. G. Holliday, J.-J. Hottenga, P. L. De Jager, M. A. Kaakinen, E. Kajantie, V. Karhunen, I. Kolcic, M. Kumari, L. J. Launer, L. Franke, R. Li-Gao, D. C. Liewald, M. Koini, A. Loukola, P. Marques-Vidal, G. W. Montgomery, M. A. Mosing, L. Paternoster, A. Pattie, K. E. Petrovic, L. Pulkki-Råback, L. Quaye, K. Räikkönen, I. Rudan, R. J. Scott, J. A. Smith, A. R. Sutin, M. Trzaskowski, A. E. Vinkhuyzen, L. Yu, D. Zabaneh, J. R. Attia, D. A. Bennett, K. Berger, L. Bertram, D. I. Boomsma, H. Snieder, S.-C. Chang, F. Cucca, I. J. Deary, C. M. van Duijn, J. G. Eriksson, U. Bültmann, E. J. C. de Geus, P. J. F. Groenen, V. Gudnason, T. Hansen, C. A. Hartman, C. M. A. Haworth, C. Hayward, A. C. Heath, D. A. Hinds, E. Hyppönen, W. G. Iacono, M.-R. Jarvelin, K.-H. Jöckel, J. Kaprio, S. L. R. Kardia, L. Keltikangas-Järvinen, P. Kraft, L. D. Kubzansky, T. Lehtimäki, P. K. E. Magnusson, N. G. Martin, M. McGue, A. Metspalu, M. Mills, R. de Mutsert, A. J. Oldehinkel, G. Pasterkamp, N. L. Pedersen, R. Plomin, O. Polasek, C. Power, S. S. Rich, F. R. Rosendaal, H. M. den Ruijter, D. Schlessinger, H. Schmidt, R. Svento, R. Schmidt, B. Z. Alizadeh, T. I. A. Sørensen, T. D. Spector, J. M. Starr, K. Stefansson, A. Steptoe, A. Terracciano, U. Thorsteinsdottir, A. R. Thurik, N. J. Timpson, H. Tiemeier, A. G. Uitterlinden, P. Vollenweider, G. G. Wagner, D. R. Weir, J. Yang, D. C. Conley, G. D. Smith, A. Hofman, M. Johannesson, D. I. Laibson, S. E. Medland, M. N. Meyer, J. K. Pickrell, T. Esko, R. F. Krueger, J. P. Beauchamp, P. D. Koellinger, D. J. Benjamin, M. Bartels, D. Cesarini; LifeLines Cohort Study, Genetic variants associated with subjective well-being, depressive symptoms, and neuroticism identified through genome-wide analyses. *Nat. Genet.* **48**, 624–633 (2016). [doi:10.1038/ng.3552](https://doi.org/10.1038/ng.3552) [Medline](#)
79. The Tobacco and Genetics Consortium, Genome-wide meta-analyses identify multiple loci associated with smoking behavior. *Nat. Genet.* **42**, 441–447 (2010). [doi:10.1038/ng.571](https://doi.org/10.1038/ng.571) [Medline](#)

80. A. R. Wood, T. Esko, J. Yang, S. Vedantam, T. H. Pers, S. Gustafsson, A. Y. Chu, K. Estrada, J. Luan, Z. Kutalik, N. Amin, M. L. Buchkovich, D. C. Croteau-Chonka, F. R. Day, Y. Duan, T. Fall, R. Fehrmann, T. Ferreira, A. U. Jackson, J. Karjalainen, K. S. Lo, A. E. Locke, R. Mägi, E. Mihailov, E. Porcu, J. C. Randall, A. Scherag, A. A. E. Vinkhuyzen, H.-J. Westra, T. W. Winkler, T. Workalemahu, J. H. Zhao, D. Absher, E. Albrecht, D. Anderson, J. Baron, M. Beekman, A. Demirkan, G. B. Ehret, B. Feenstra, M. F. Feitosa, K. Fischer, R. M. Fraser, A. Goel, J. Gong, A. E. Justice, S. Kanoni, M. E. Kleber, K. Kristiansson, U. Lim, V. Lotay, J. C. Lui, M. Mangino, I. Mateo Leach, C. Medina-Gomez, M. A. Nalls, D. R. Nyholt, C. D. Palmer, D. Pasko, S. Pechlivanis, I. Prokopenko, J. S. Ried, S. Ripke, D. Shungin, A. Stancáková, R. J. Strawbridge, Y. J. Sung, T. Tanaka, A. Teumer, S. Trompet, S. W. van der Laan, J. van Setten, J. V. Van Vliet-Ostaptchouk, Z. Wang, L. Yengo, W. Zhang, U. Afzal, J. Arnlöv, G. M. Arscott, S. Bandinelli, A. Barrett, C. Bellis, A. J. Bennett, C. Berne, M. Blüher, J. L. Bolton, Y. Böttcher, H. A. Boyd, M. Bruinenberg, B. M. Buckley, S. Buyske, I. H. Caspersen, P. S. Chines, R. Clarke, S. Claudi-Boehm, M. Cooper, E. W. Daw, P. A. De Jong, J. Deelen, G. Delgado, J. C. Denny, R. Dhonukshe-Rutten, M. Dimitriou, A. S. F. Doney, M. Dörr, N. Eklund, E. Eury, L. Folkersen, M. E. Garcia, F. Geller, V. Giedraitis, A. S. Go, H. Grallert, T. B. Grammer, J. Gräßler, H. Grönberg, L. C. P. G. M. de Groot, C. J. Groves, J. Haessler, P. Hall, T. Haller, G. Hallmans, A. Hannemann, C. A. Hartman, M. Hassinen, C. Hayward, N. L. Heard-Costa, Q. Helmer, G. Hemani, A. K. Henders, H. L. Hillege, M. A. Hlatky, W. Hoffmann, P. Hoffmann, O. Holmen, J. J. Houwing-Duistermaat, T. Illig, A. Isaacs, A. L. James, J. Jeff, B. Johansen, Å. Johansson, J. Jolley, T. Juliusdottir, J. Junttila, A. N. Kho, L. Kinnunen, N. Klopp, T. Kocher, W. Kratzer, P. Lichtner, L. Lind, J. Lindström, S. Lobbens, M. Lorentzon, Y. Lu, V. Lyssenko, P. K. E. Magnusson, A. Mahajan, M. Maillard, W. L. McArdle, C. A. McKenzie, S. McLachlan, P. J. McLaren, C. Menni, S. Merger, L. Milani, A. Moayyeri, K. L. Monda, M. A. Morken, G. Müller, M. Müller-Nurasyid, A. W. Musk, N. Narisu, M. Nauck, I. M. Nolte, M. M. Nöthen, L. Oozageer, S. Pilz, N. W. Rayner, F. Renstrom, N. R. Robertson, L. M. Rose, R. Roussel, S. Sanna, H. Scharnagl, S. Scholtens, F. R. Schumacher, H. Schunkert, R. A. Scott, J. Sehmi, T. Seufferlein, J. Shi, K. Silventoinen, J. H. Smit, A. V. Smith, J. Smolonska, A. V. Stanton, K. Stirrups, D. J. Stott, H. M. Stringham, J. Sundström, M. A. Swertz, A.-C. Syvänen, B. O. Tayo, G. Thorleifsson, J. P. Tyrer, S. van Dijk, N. M. van Schoor, N. van der Velde, D. van Heemst, F. V. A. van Oort, S. H. Vermeulen, N. Verweij, J. M. Vonk, L. L. Waite, M. Waldenberger, R. Wennauer, L. R. Wilkens, C. Willenborg, T. Wilsgaard, M. K. Wojczynski, A. Wong, A. F. Wright, Q. Zhang, D. Arveiler, S. J. L. Bakker, J. Beilby, R. N. Bergman, S. Bergmann, R. Biffar, J. Blangero, D. I. Boomsma, S. R. Bornstein, P. Bovet, P. Brambilla, M. J. Brown, H. Campbell, M. J. Caulfield, A. Chakravarti, R. Collins, F. S. Collins, D. C. Crawford, L. A. Cupples, J. Danesh, U. de Faire, H. M. den Ruijter, R. Erbel, J. Erdmann, J. G. Eriksson, M. Farrall, E. Ferrannini, J. Ferrières, I. Ford, N. G. Forouhi, T. Forrester, R. T. Gansevoort, P. V. Gejman, C. Gieger, A. Golay, O. Gottesman, V. Gudnason, U. Gyllensten, D. W. Haas, A. S. Hall, T. B. Harris, A. T. Hattersley, A. C. Heath, C. Hengstenberg, A. A. Hicks, L. A. Hindorff, A. D. Hingorani, A. Hofman, G. K. Hovingh, S. E. Humphries, S. C. Hunt, E. Hyppönen, K. B. Jacobs, M.-R. Jarvelin, P. Jousilahti, A. M. Jula, J. Kaprio, J. J. P. Kastelein, M. Kayser, F. Kee, S. M. Keinanen-Kiukaanniemi, L. A. Kiemeny, J. S. Kooner, C. Kooperberg, S. Koskinen, P. Kovacs, A. T. Kraja, M. Kumari, J. Kuusisto, T.

- A. Lakka, C. Langenberg, L. Le Marchand, T. Lehtimäki, S. Lupoli, P. A. F. Madden, S. Männistö, P. Manunta, A. Marette, T. C. Matise, B. McKnight, T. Meitinger, F. L. Moll, G. W. Montgomery, A. D. Morris, A. P. Morris, J. C. Murray, M. Nelis, C. Ohlsson, A. J. Oldehinkel, K. K. Ong, W. H. Ouwehand, G. Pasterkamp, A. Peters, P. P. Pramstaller, J. F. Price, L. Qi, O. T. Raitakari, T. Rankinen, D. C. Rao, T. K. Rice, M. Ritchie, I. Rudan, V. Salomaa, N. J. Samani, J. Saramies, M. A. Sarzynski, P. E. H. Schwarz, S. Sebert, P. Sever, A. R. Shuldiner, J. Sinisalo, V. Steinthorsdottir, R. P. Stolk, J.-C. Tardif, A. Tönjes, A. Tremblay, E. Tremoli, J. Virtamo, M.-C. Vohl, P. Amouyel, F. W. Asselbergs, T. L. Assimes, M. Bochud, B. O. Boehm, E. Boerwinkle, E. P. Bottinger, C. Bouchard, S. Cauchi, J. C. Chambers, S. J. Chanock, R. S. Cooper, P. I. W. de Bakker, G. Dedoussis, L. Ferrucci, P. W. Franks, P. Froguel, L. C. Groop, C. A. Haiman, A. Hamsten, M. G. Hayes, J. Hui, D. J. Hunter, K. Hveem, J. W. Jukema, R. C. Kaplan, M. Kivimaki, D. Kuh, M. Laakso, Y. Liu, N. G. Martin, W. März, M. Melbye, S. Moebus, P. B. Munroe, I. Njølstad, B. A. Oostra, C. N. A. Palmer, N. L. Pedersen, M. Perola, L. Pérusse, U. Peters, J. E. Powell, C. Power, T. Quertermous, R. Rauramaa, E. Reinmaa, P. M. Ridker, F. Rivadeneira, J. I. Rotter, T. E. Saaristo, D. Saleheen, D. Schlessinger, P. E. Slagboom, H. Snieder, T. D. Spector, K. Strauch, M. Stumvoll, J. Tuomilehto, M. Uusitupa, P. van der Harst, H. Völzke, M. Walker, N. J. Wareham, H. Watkins, H.-E. Wichmann, J. F. Wilson, P. Zanen, P. Deloukas, I. M. Heid, C. M. Lindgren, K. L. Mohlke, E. K. Speliotes, U. Thorsteinsdottir, I. Barroso, C. S. Fox, K. E. North, D. P. Strachan, J. S. Beckmann, S. I. Berndt, M. Boehnke, I. B. Borecki, M. I. McCarthy, A. Metspalu, K. Stefansson, A. G. Uitterlinden, C. M. van Duijn, L. Franke, C. J. Willer, A. L. Price, G. Lettre, R. J. F. Loos, M. N. Weedon, E. Ingelsson, J. R. O'Connell, G. R. Abecasis, D. I. Chasman, M. E. Goddard, P. M. Visscher, J. N. Hirschhorn, T. M. Frayling; Electronic Medical Records and Genomics (eMEMERGE) Consortium; MIGen Consortium; PAGEGE Consortium; LifeLines Cohort Study, Defining the role of common variation in the genomic and biological architecture of adult human height. *Nat. Genet.* **46**, 1173–1186 (2014). [doi:10.1038/ng.3097](https://doi.org/10.1038/ng.3097) [Medline](#)
81. H. Schunkert, I. R. König, S. Kathiresan, M. P. Reilly, T. L. Assimes, H. Holm, M. Preuss, A. F. R. Stewart, M. Barbalic, C. Gieger, D. Absher, Z. Aherrahrou, H. Allayee, D. Altshuler, S. S. Anand, K. Andersen, J. L. Anderson, D. Ardissino, S. G. Ball, A. J. Balmforth, T. A. Barnes, D. M. Becker, L. C. Becker, K. Berger, J. C. Bis, S. M. Boekholdt, E. Boerwinkle, P. S. Braund, M. J. Brown, M. S. Burnett, I. Buysschaert, J. F. Carlquist, L. Chen, S. Cichon, V. Codd, R. W. Davies, G. Dedoussis, A. Dehghan, S. Demissie, J. M. Devaney, P. Diemert, R. Do, A. Doering, S. Eifert, N. E. E. Mokhtari, S. G. Ellis, R. Elosua, J. C. Engert, S. E. Epstein, U. de Faire, M. Fischer, A. R. Folsom, J. Freyer, B. Gigante, D. Girelli, S. Gretarsdottir, V. Gudnason, J. R. Gulcher, E. Halperin, N. Hammond, S. L. Hazen, A. Hofman, B. D. Horne, T. Illig, C. Iribarren, G. T. Jones, J. W. Jukema, M. A. Kaiser, L. M. Kaplan, J. J. P. Kastelein, K.-T. Khaw, J. W. Knowles, G. Kolovou, A. Kong, R. Laaksonen, D. Lambrechts, K. Leander, G. Lettre, M. Li, W. Lieb, C. Loley, A. J. Lotery, P. M. Mannucci, S. Maouche, N. Martinelli, P. P. McKeown, C. Meisinger, T. Meitinger, O. Melander, P. A. Merlini, V. Mooser, T. Morgan, T. W. Mühleisen, J. B. Muhlestein, T. Münzel, K. Musunuru, J. Nahrstaedt, C. P. Nelson, M. M. Nöthen, O. Olivieri, R. S. Patel, C. C. Patterson, A. Peters, F. Peyvandi, L. Qu, A. A. Quyyumi, D. J. Rader, L. S. Rallidis, C. Rice, F. R. Rosendaal, D. Rubin, V. Salomaa, M. L. Sampietro, M. S. Sandhu, E. Schadt, A. Schäfer, A. Schillert, S.

- Schreiber, J. Schrezenmeir, S. M. Schwartz, D. S. Siscovick, M. Sivananthan, S. Sivapalaratnam, A. Smith, T. B. Smith, J. D. Snoep, N. Soranzo, J. A. Spertus, K. Stark, K. Stirrups, M. Stoll, W. H. W. Tang, S. Tennstedt, G. Thorgeirsson, G. Thorleifsson, M. Tomaszewski, A. G. Uitterlinden, A. M. van Rij, B. F. Voight, N. J. Wareham, G. A. Wells, H.-E. Wichmann, P. S. Wild, C. Willenborg, J. C. M. Witteman, B. J. Wright, S. Ye, T. Zeller, A. Ziegler, F. Cambien, A. H. Goodall, L. A. Cupples, T. Quertermous, W. März, C. Hengstenberg, S. Blankenberg, W. H. Ouwehand, A. S. Hall, P. Deloukas, J. R. Thompson, K. Stefansson, R. Roberts, U. Thorsteinsdottir, C. J. O'Donnell, R. McPherson, J. Erdmann, N. J. Samani; Cardiogenics; CARDIoGRAM Consortium, Large-scale association analysis identifies 13 new susceptibility loci for coronary artery disease. *Nat. Genet.* **43**, 333–338 (2011). [doi:10.1038/ng.784](https://doi.org/10.1038/ng.784) [Medline](#)
82. L. Jostins, S. Ripke, R. K. Weersma, R. H. Duerr, D. P. McGovern, K. Y. Hui, J. C. Lee, L. P. Schumm, Y. Sharma, C. A. Anderson, J. Essers, M. Mitrovic, K. Ning, I. Cleyne, E. Theatre, S. L. Spain, S. Raychaudhuri, P. Goyette, Z. Wei, C. Abraham, J.-P. Achkar, T. Ahmad, L. Amininejad, A. N. Ananthakrishnan, V. Andersen, J. M. Andrews, L. Baidoo, T. Balschun, P. A. Bampton, A. Bitton, G. Boucher, S. Brand, C. Büning, A. Cohain, S. Cichon, M. D'Amato, D. De Jong, K. L. Devaney, M. Dubinsky, C. Edwards, D. Ellinghaus, L. R. Ferguson, D. Franchimont, K. Fransen, R. Gearry, M. Georges, C. Gieger, J. Glas, T. Haritunians, A. Hart, C. Hawkey, M. Hedl, X. Hu, T. H. Karlsen, L. Kupcinkas, S. Kugathasan, A. Latiano, D. Laukens, I. C. Lawrance, C. W. Lees, E. Louis, G. Mahy, J. Mansfield, A. R. Morgan, C. Mowat, W. Newman, O. Palmieri, C. Y. Ponsioen, U. Potocnik, N. J. Prescott, M. Regueiro, J. I. Rotter, R. K. Russell, J. D. Sanderson, M. Sans, J. Satsangi, S. Schreiber, L. A. Simms, J. Sventoraityte, S. R. Targan, K. D. Taylor, M. Tremelling, H. W. Verspaget, M. De Vos, C. Wijmenga, D. C. Wilson, J. Winkelmann, R. J. Xavier, S. Zeissig, B. Zhang, C. K. Zhang, H. Zhao, M. S. Silverberg, V. Annese, H. Hakonarson, S. R. Brant, G. Radford-Smith, C. G. Mathew, J. D. Rioux, E. E. Schadt, M. J. Daly, A. Franke, M. Parkes, S. Vermeire, J. C. Barrett, J. H. Cho; International IBD Genetics Consortium (IBDGC), Host-microbe interactions have shaped the genetic architecture of inflammatory bowel disease. *Nature* **491**, 119–124 (2012). [doi:10.1038/nature11582](https://doi.org/10.1038/nature11582) [Medline](#)
83. D. M. Altshuler, R. A. Gibbs, L. Peltonen, D. M. Altshuler, R. A. Gibbs, L. Peltonen, E. Dermitzakis, S. F. Schaffner, F. Yu, L. Peltonen, E. Dermitzakis, P. E. Bonnen, D. M. Altshuler, R. A. Gibbs, P. I. de Bakker, P. Deloukas, S. B. Gabriel, R. Gwilliam, S. Hunt, M. Inouye, X. Jia, A. Palotie, M. Parkin, P. Whittaker, F. Yu, K. Chang, A. Hawes, L. R. Lewis, Y. Ren, D. Wheeler, R. A. Gibbs, D. M. Muzny, C. Barnes, K. Darvishi, M. Hurles, J. M. Korn, K. Kristiansson, C. Lee, S. A. McCarroll, J. Nemesh, E. Dermitzakis, A. Keinan, S. B. Montgomery, S. Pollack, A. L. Price, N. Soranzo, P. E. Bonnen, R. A. Gibbs, C. Gonzaga-Jauregui, A. Keinan, A. L. Price, F. Yu, V. Anttila, W. Brodeur, M. J. Daly, S. Leslie, G. McVean, L. Moutsianas, H. Nguyen, S. F. Schaffner, Q. Zhang, M. J. Ghorji, R. McGinnis, W. McLaren, S. Pollack, A. L. Price, S. F. Schaffner, F. Takeuchi, S. R. Grossman, I. Shlyakhter, E. B. Hostetter, P. C. Sabeti, C. A. Adebamowo, M. W. Foster, D. R. Gordon, J. Licinio, M. C. Manca, P. A. Marshall, I. Matsuda, D. Ngare, V. O. Wang, D. Reddy, C. N. Rotimi, C. D. Royal, R. R. Sharp, C. Zeng, L. D. Brooks, J. E. McEwen; International HapMap 3 Consortium, Integrating common and rare genetic variation in diverse human populations. *Nature* **467**, 52–58 (2010). [doi:10.1038/nature09298](https://doi.org/10.1038/nature09298) [Medline](#)

84. C. Sudlow, J. Gallacher, N. Allen, V. Beral, P. Burton, J. Danesh, P. Downey, P. Elliott, J. Green, M. Landray, B. Liu, P. Matthews, G. Ong, J. Pell, A. Silman, A. Young, T. Sprosen, T. Peakman, R. Collins, UK biobank: An open access resource for identifying the causes of a wide range of complex diseases of middle and old age. *PLOS Med.* **12**, e1001779 (2015). [doi:10.1371/journal.pmed.1001779](https://doi.org/10.1371/journal.pmed.1001779) [Medline](#)
85. C. C. Chang, C. C. Chow, L. C. A. M. Tellier, S. Vattikuti, S. M. Purcell, J. J. Lee, Second-generation PLINK: Rising to the challenge of larger and richer datasets. *Gigascience* **4**, 7 (2015). [doi:10.1186/s13742-015-0047-8](https://doi.org/10.1186/s13742-015-0047-8) [Medline](#)
86. W. J. Peyrot, D. I. Boomsma, B. W. Penninx, N. R. Wray, Disease and polygenic architecture: Avoid trio design and appropriately account for unscreened control subjects for common disease. *Am. J. Hum. Genet.* **98**, 382–391 (2016). [doi:10.1016/j.ajhg.2015.12.017](https://doi.org/10.1016/j.ajhg.2015.12.017) [Medline](#)
87. D. R. Nyholt, A simple correction for multiple testing for single-nucleotide polymorphisms in linkage disequilibrium with each other. *Am. J. Hum. Genet.* **74**, 765–769 (2004). [doi:10.1086/383251](https://doi.org/10.1086/383251) [Medline](#)
88. J. Li, L. Ji, Adjusting multiple testing in multilocus analyses using the eigenvalues of a correlation matrix. *Heredity* **95**, 221–227 (2005). [doi:10.1038/sj.hdy.6800717](https://doi.org/10.1038/sj.hdy.6800717) [Medline](#)
89. L. E. Duncan, A. Ratanatharathorn, A. E. Aiello, L. M. Almli, A. B. Amstadter, A. E. Ashley-Koch, D. G. Baker, J. C. Beckham, L. J. Bierut, J. Bisson, B. Bradley, C. Y. Chen, S. Dalvie, L. A. Farrer, S. Galea, M. E. Garrett, J. E. Gelernter, G. Guffanti, M. A. Hauser, E. O. Johnson, R. C. Kessler, N. A. Kimbrel, A. King, N. Koen, H. R. Kranzler, M. W. Logue, A. X. Maihofer, A. R. Martin, M. W. Miller, R. A. Morey, N. R. Nugent, J. P. Rice, S. Ripke, A. L. Roberts, N. L. Saccone, J. W. Smoller, D. J. Stein, M. B. Stein, J. A. Sumner, M. Uddin, R. J. Ursano, D. E. Wildman, R. Yehuda, H. Zhao, M. J. Daly, I. Liberzon, K. J. Ressler, C. M. Nievergelt, K. C. Koenen, Largest GWAS of PTSD (N=20 070) yields genetic overlap with schizophrenia and sex differences in heritability. *Mol. Psychiatry* **23**, 666–673 (2018). [Medline](#)
90. P. Gormley, V. Anttila, B. S. Winsvold, P. Palta, T. Esko, T. H. Pers, K.-H. Farh, E. Cuenca-Leon, M. Muona, N. A. Furlotte, T. Kurth, A. Ingason, G. McMahon, L. Ligthart, G. M. Terwindt, M. Kallela, T. M. Freilinger, C. Ran, S. G. Gordon, A. H. Stam, S. Steinberg, G. Borck, M. Koiranen, L. Quaye, H. H. H. Adams, T. Lehtimäki, A.-P. Sarin, J. Wedenoja, D. A. Hinds, J. E. Buring, M. Schürks, P. M. Ridker, M. G. Hrafnisdottir, H. Stefansson, S. M. Ring, J.-J. Hottenga, B. W. J. H. Penninx, M. Färkkilä, V. Artto, M. Kaunisto, S. Vepsäläinen, R. Malik, A. C. Heath, P. A. F. Madden, N. G. Martin, G. W. Montgomery, M. I. Kurki, M. Kals, R. Mägi, K. Pärn, E. Hämäläinen, H. Huang, A. E. Byrnes, L. Franke, J. Huang, E. Stergiakouli, P. H. Lee, C. Sandor, C. Webber, Z. Cader, B. Muller-Myhsok, S. Schreiber, T. Meitinger, J. G. Eriksson, V. Salomaa, K. Heikkilä, E. Loehrer, A. G. Uitterlinden, A. Hofman, C. M. van Duijn, L. Cherkas, L. M. Pedersen, A. Stubhaug, C. S. Nielsen, M. Männikkö, E. Mihailov, L. Milani, H. Göbel, A.-L. Esserlind, A. F. Christensen, T. F. Hansen, T. Werge, J. Kaprio, A. J. Aromaa, O. Raitakari, M. A. Ikram, T. Spector, M.-R. Jarvelin, A. Metspalu, C. Kubisch, D. P. Strachan, M. D. Ferrari, A. C. Belin, M. Dichgans, M. Wessman, A. M. J. M. van den Maagdenberg, J.-A. Zwart, D. I. Boomsma, G. D. Smith, K. Stefansson, N. Eriksson, M. J. Daly, B. M. Neale, J. Olesen, D. I. Chasman, D. R. Nyholt, A. Palotie; International



Headache Genetics Consortium, Meta-analysis of 375,000 individuals identifies 38 susceptibility loci for migraine. *Nat. Genet.* **48**, 856–866 (2016). [doi:10.1038/ng.3598](https://doi.org/10.1038/ng.3598) [Medline](#)

91. M. A. Nalls, V. Plagnol, D. G. Hernandez, M. Sharma, U. M. Sheerin, M. Saad, J. Simón-Sánchez, C. Schulte, S. Lesage, S. Sveinbjörnsdóttir, K. Stefánsson, M. Martinez, J. Hardy, P. Heutink, A. Brice, T. Gasser, A. B. Singleton, N. W. Wood; International Parkinson Disease Genomics Consortium, Imputation of sequence variants for identification of genetic risks for Parkinson's disease: A meta-analysis of genome-wide association studies. *Lancet* **377**, 641–649 (2011). [doi:10.1016/S0140-6736\(10\)62345-8](https://doi.org/10.1016/S0140-6736(10)62345-8) [Medline](#)
92. J. I. Hudson, E. Hiripi, H. G. Pope Jr., R. C. Kessler, The prevalence and correlates of eating disorders in the National Comorbidity Survey Replication. *Biol. Psychiatry* **61**, 348–358 (2007). [doi:10.1016/j.biopsych.2006.03.040](https://doi.org/10.1016/j.biopsych.2006.03.040) [Medline](#)
93. M. Karno, J. M. Golding, S. B. Sorenson, M. A. Burnam, The epidemiology of obsessive-compulsive disorder in five US communities. *Arch. Gen. Psychiatry* **45**, 1094–1099 (1988). [doi:10.1001/archpsyc.1988.01800360042006](https://doi.org/10.1001/archpsyc.1988.01800360042006) [Medline](#)
94. R. C. Kessler, A. Sonnega, E. Bromet, M. Hughes, C. B. Nelson, Posttraumatic stress disorder in the National Comorbidity Survey. *Arch. Gen. Psychiatry* **52**, 1048–1060 (1995). [doi:10.1001/archpsyc.1995.03950240066012](https://doi.org/10.1001/archpsyc.1995.03950240066012) [Medline](#)
95. M. M. Robertson, The prevalence and epidemiology of Gilles de la Tourette syndrome. Part 1: The epidemiological and prevalence studies. *J. Psychosom. Res.* **65**, 461–472 (2008). [doi:10.1016/j.jpsychores.2008.03.006](https://doi.org/10.1016/j.jpsychores.2008.03.006) [Medline](#)
96. D. C. Hesdorffer, G. Logroscino, E. K. T. Benn, N. Katri, G. Cascino, W. A. Hauser, Estimating risk for developing epilepsy: A population-based study in Rochester, Minnesota. *Neurology* **76**, 23–27 (2011). [doi:10.1212/WNL.0b013e318204a36a](https://doi.org/10.1212/WNL.0b013e318204a36a) [Medline](#)
97. V. L. Feigin, C. M. Lawes, D. A. Bennett, S. L. Barker-Collo, V. Parag, Worldwide stroke incidence and early case fatality reported in 56 population-based studies: A systematic review. *Lancet Neurol.* **8**, 355–369 (2009). [doi:10.1016/S1474-4422\(09\)70025-0](https://doi.org/10.1016/S1474-4422(09)70025-0) [Medline](#)
98. R. Bonita, N. Solomon, J. B. Broad, Prevalence of stroke and stroke-related disability. Estimates from the Auckland stroke studies. *Stroke* **28**, 1898–1902 (1997). [doi:10.1161/01.STR.28.10.1898](https://doi.org/10.1161/01.STR.28.10.1898) [Medline](#)
99. R. B. Lipton, W. F. Stewart, S. Diamond, M. L. Diamond, M. Reed, Prevalence and burden of migraine in the United States: Data from the American Migraine Study II. *Headache* **41**, 646–657 (2001). [doi:10.1046/j.1526-4610.2001.041007646.x](https://doi.org/10.1046/j.1526-4610.2001.041007646.x) [Medline](#)
100. M. B. Russell, V. Ulrich, M. Gervil, J. Olesen, Migraine without aura and migraine with aura are distinct disorders. A population-based twin survey. *Headache* **42**, 332–336 (2002). [doi:10.1046/j.1526-4610.2002.02102.x](https://doi.org/10.1046/j.1526-4610.2002.02102.x) [Medline](#)
101. B. K. MacDonald, O. C. Cockerell, J. W. Sander, S. D. Shorvon, The incidence and lifetime prevalence of neurological disorders in a prospective community-based study in the UK. *Brain* **123**, 665–676 (2000). [doi:10.1093/brain/123.4.665](https://doi.org/10.1093/brain/123.4.665) [Medline](#)

102. S. M. van den Berg, M. H. M. de Moor, K. J. H. Verweij, R. F. Krueger, M. Luciano, A. Arias Vasquez, L. K. Matteson, J. Derringer, T. Esko, N. Amin, S. D. Gordon, N. K. Hansell, A. B. Hart, I. Seppälä, J. E. Huffman, B. Konte, J. Lahti, M. Lee, M. Miller, T. Nutile, T. Tanaka, A. Teumer, A. Viktorin, J. Wedenoja, A. Abdellaoui, G. R. Abecasis, D. E. Adkins, A. Agrawal, J. Allik, K. Appel, T. B. Bigdeli, F. Busonero, H. Campbell, P. T. Costa, G. D. Smith, G. Davies, H. de Wit, J. Ding, B. E. Engelhardt, J. G. Eriksson, I. O. Fedko, L. Ferrucci, B. Franke, I. Giegling, R. Grucza, A. M. Hartmann, A. C. Heath, K. Heinonen, A. K. Henders, G. Homuth, J.-J. Hottenga, W. G. Iacono, J. Janzing, M. Jokela, R. Karlsson, J. P. Kemp, M. G. Kirkpatrick, A. Latvala, T. Lehtimäki, D. C. Liewald, P. A. F. Madden, C. Magri, P. K. E. Magnusson, J. Marten, A. Maschio, H. Mbarek, S. E. Medland, E. Mihailov, Y. Milaneschi, G. W. Montgomery, M. Nauck, M. G. Nivard, K. G. Ouwens, A. Palotie, E. Pettersson, O. Polasek, Y. Qian, L. Pulkki-Råback, O. T. Raitakari, A. Realo, R. J. Rose, D. Ruggiero, C. O. Schmidt, W. S. Slutske, R. Sorice, J. M. Starr, B. St Pourcain, A. R. Sutin, N. J. Timpson, H. Trochet, S. Vermeulen, E. Vuoksima, E. Widen, J. Wouda, M. J. Wright, L. Zgaga, D. Porteous, A. Minelli, A. A. Palmer, D. Rujescu, M. Ciullo, C. Hayward, I. Rudan, A. Metspalu, J. Kaprio, I. J. Deary, K. Räikkönen, J. F. Wilson, L. Keltikangas-Järvinen, L. J. Bierut, J. M. Hettema, H. J. Grabe, B. W. J. H. Penninx, C. M. van Duijn, D. M. Evans, D. Schlessinger, N. L. Pedersen, A. Terracciano, M. McGue, N. G. Martin, D. I. Boomsma; Generation Scotland, Meta-analysis of genome-wide association studies for extraversion: Findings from the Genetics of Personality Consortium. *Behav. Genet.* **46**, 170–182 (2016). [doi:10.1007/s10519-015-9735-5](https://doi.org/10.1007/s10519-015-9735-5) [Medline](#)
103. L. K. Davis, D. Yu, C. L. Keenan, E. R. Gamazon, A. I. Konkashbaev, E. M. Derks, B. M. Neale, J. Yang, S. H. Lee, P. Evans, C. L. Barr, L. Bellodi, F. Benarroch, G. B. Berrio, O. J. Bienvenu, M. H. Bloch, R. M. Blom, R. D. Bruun, C. L. Budman, B. Camarena, D. Campbell, C. Cappi, J. C. Cardona Silgado, D. C. Cath, M. C. Cavallini, D. A. Chavira, S. Chouinard, D. V. Conti, E. H. Cook, V. Coric, B. A. Cullen, D. Deforce, R. Delorme, Y. Dion, C. K. Edlund, K. Egberts, P. Falkai, T. V. Fernandez, P. J. Gallagher, H. Garrido, D. Geller, S. L. Girard, H. J. Grabe, M. A. Grados, B. D. Greenberg, V. Gross-Tsur, S. Haddad, G. A. Heiman, S. M. J. Hemmings, A. G. Hounie, C. Illmann, J. Jankovic, M. A. Jenike, J. L. Kennedy, R. A. King, B. Kremeyer, R. Kurlan, N. Lanzagorta, M. Leboyer, J. F. Leckman, L. Lennertz, C. Liu, C. Lochner, T. L. Lowe, F. Macciardi, J. T. McCracken, L. M. McGrath, S. C. Mesa Restrepo, R. Moessner, J. Morgan, H. Muller, D. L. Murphy, A. L. Naarden, W. C. Ochoa, R. A. Ophoff, L. Osiecki, A. J. Pakstis, M. T. Pato, C. N. Pato, J. Piacentini, C. Pittenger, Y. Pollak, S. L. Rauch, T. J. Renner, V. I. Reus, M. A. Richter, M. A. Riddle, M. M. Robertson, R. Romero, M. C. Rosário, D. Rosenberg, G. A. Rouleau, S. Ruhrmann, A. Ruiz-Linares, A. S. Sampaio, J. Samuels, P. Sandor, B. Sheppard, H. S. Singer, J. H. Smit, D. J. Stein, E. Strengman, J. A. Tischfield, A. V. Valencia Duarte, H. Vallada, F. Van Nieuwerburgh, J. Veenstra-Vanderweele, S. Walitza, Y. Wang, J. R. Wendland, H. G. M. Westenberg, Y. Y. Shugart, E. C. Miguel, W. McMahon, M. Wagner, H. Nicolini, D. Posthuma, G. L. Hanna, P. Heutink, D. Denys, P. D. Arnold, B. A. Oostra, G. Nestadt, N. B. Freimer, D. L. Pauls, N. R. Wray, S. E. Stewart, C. A. Mathews, J. A. Knowles, N. J. Cox, J. M. Scharf, Partitioning the heritability of Tourette syndrome and obsessive compulsive disorder reveals differences in genetic architecture. *PLOS Genet.* **9**, e1003864 (2013). [doi:10.1371/journal.pgen.1003864](https://doi.org/10.1371/journal.pgen.1003864) [Medline](#)

104. D. Speed, T. J. O'Brien, A. Palotie, K. Shkura, A. G. Marson, D. J. Balding, M. R. Johnson, Describing the genetic architecture of epilepsy through heritability analysis. *Brain* **137**, 2680–2689 (2014). [doi:10.1093/brain/awu206](https://doi.org/10.1093/brain/awu206) [Medline](#)
105. W. J. Devan, G. J. Falcone, C. D. Anderson, J. M. Jagiella, H. Schmidt, B. M. Hansen, J. Jimenez-Conde, E. Giralt-Steinhauer, E. Cuadrado-Godia, C. Soriano, A. M. Ayres, K. Schwab, S. B. Kassis, V. Valant, J. Pera, A. Urbanik, A. Viswanathan, N. S. Rost, J. N. Goldstein, P. Freudenberger, E.-M. Stögerer, B. Norrving, D. L. Tirschwell, M. Selim, D. L. Brown, S. L. Silliman, B. B. Worrall, J. F. Meschia, C. S. Kidwell, J. Montaner, I. Fernandez-Cadenas, P. Delgado, S. M. Greenberg, J. Roquer, A. Lindgren, A. Slowik, R. Schmidt, D. Woo, J. Rosand, A. Biffi; International Stroke Genetics Consortium, Heritability estimates identify a substantial genetic contribution to risk and outcome of intracerebral hemorrhage. *Stroke* **44**, 1578–1583 (2013). [doi:10.1161/STROKEAHA.111.000089](https://doi.org/10.1161/STROKEAHA.111.000089) [Medline](#)
106. S. Bevan, M. Traylor, P. Adib-Samii, R. Malik, N. L. M. Paul, C. Jackson, M. Farrall, P. M. Rothwell, C. Sudlow, M. Dichgans, H. S. Markus, Genetic heritability of ischemic stroke and the contribution of previously reported candidate gene and genomewide associations. *Stroke* **43**, 3161–3167 (2012). [doi:10.1161/STROKEAHA.112.665760](https://doi.org/10.1161/STROKEAHA.112.665760) [Medline](#)
107. M. F. Keller, M. Saad, J. Bras, F. Bettella, N. Nicolaou, J. Simón-Sánchez, F. Mittag, F. Büchel, M. Sharma, J. R. Gibbs, C. Schulte, V. Moskvina, A. Durr, P. Holmans, L. L. Kilarski, R. Guerreiro, D. G. Hernandez, A. Brice, P. Ylikotila, H. Stefánsson, K. Majamaa, H. R. Morris, N. Williams, T. Gasser, P. Heutink, N. W. Wood, J. Hardy, M. Martinez, A. B. Singleton, M. A. Nalls; International Parkinson's Disease Genomics Consortium (IPDGC); Wellcome Trust Case Control Consortium 2 (WTCCC2), Using genome-wide complex trait analysis to quantify 'missing heritability' in Parkinson's disease. *Hum. Mol. Genet.* **21**, 4996–5009 (2012). [doi:10.1093/hmg/dds335](https://doi.org/10.1093/hmg/dds335) [Medline](#)
108. K. R. Merikangas, H. S. Akiskal, J. Angst, P. E. Greenberg, R. M. A. Hirschfeld, M. Petukhova, R. C. Kessler, Lifetime and 12-month prevalence of bipolar spectrum disorder in the National Comorbidity Survey replication. *Arch. Gen. Psychiatry* **64**, 543–552 (2007). [doi:10.1001/archpsyc.64.5.543](https://doi.org/10.1001/archpsyc.64.5.543) [Medline](#)
